# Supplementary material for: Al42−; the anion–π interactions and aromaticity in the presence of counter ions
Source: Royal Society of Chemistry journal article supplement (doi:10.1039/c2cp40511c), 2012-01-01
Supplement: c2cp40511c.pdf [file c2cp40511c.pdf]

# **$\text{Al}_4^{2-}$ ; From Aromaticity to Molecular Machines**

*Cina Foroutan-Nejad*

School of Chemistry, College of Science, University of Tehran, Tehran, Iran

[Cina-foroutan@khayam.ut.ac.ir](mailto:Cina-foroutan@khayam.ut.ac.ir)

Table S-1: The out-of-plane intra- and interatomic dipole moments of  $Al_4^{2-}$  salts with alkaline metals and alkaline earth metals, page S-3.

Figure S-1: The plot of  $\pi$ -isotropic intra-atomic magnetizability versus bond length variation among  $Al_4^{2-}$  salts with alkaline metals and alkaline earth metals, page S-4.

Figure S-2: The plot of Total and  $\sigma$ -isotropic intra-atomic magnetizabilities versus bond length variation among  $Al_4^{2-}$  salts with alkaline metals and alkaline earth metals, page S-4.

Figure S-3: The plot of bond length magnetizability versus 1,2 delocalization indices among  $Al_4^{2-}$  salts with alkaline metals and alkaline earth metals, page S-5.

Figure S-4: The plot of  $\pi$ -bond magnetizability versus  $\pi$ -charge of the  $Al_4$  framework among  $Al_4^{2-}$  salts with alkaline metals and alkaline earth metals, page S-5.

Figure S-5: The plot of  $\sigma$ -bond magnetizability versus  $\pi$ -charge of the  $Al_4$  framework among  $Al_4^{2-}$  salts with alkaline metals and alkaline earth metals, page S-6.

Figure S-6: The plot of binding energy versus the distance between the geometric center of the  $Al_4$  framework and the nearest hydrogen nucleus in benzene for T-shaped complexes between  $Al_4^{2-}$  salts with alkaline metals and alkaline earth metals and the benzene, page S-6.

Figure S-7: The plot of binding energy versus the distance between the geometric centers of the  $Al_4$  framework and the benzene for PPS complexes between  $Al_4^{2-}$  salts with alkaline metals and alkaline earth metals and the benzene, page S-7.

Figure S-8: The plot of binding energy versus the charge of the benzene for T-shaped complexes between  $Al_4^{2-}$  salts with alkaline metals and alkaline earth metals and the benzene, page S-7.

Figure S-9: The plot of binding energy versus the charge of the benzene for PPS complexes between  $Al_4^{2-}$  salts with alkaline metals and alkaline earth metals and the benzene, page S-8.

The Z-matrixes of all studied molecules, page S-9.

The electronic delocalization indices between various atomic basins in  $Al_4$  complexes;  $2*D2(A,B) = 2*D2(B,A) =$  Average Number of Electron Pairs Shared Between Atoms A and B;  $DI(A,B) = DI(B,A) =$  Electron Delocalization Index. Average Number of Electrons Delocalized (Shared) Between Atoms A and B. Bond Index When Atoms A and B Connected by a Bond Path;

$\%Deloc(A,B) = 100 * (DI(A,B)/2)/N(A) =$  Percentage of Average Number of Electrons in Atom A That are Shared With Atom B;

$\%Deloc(B,A) = 100 * (DI(A,B)/2)/N(B) =$  Percentage of Average Number of Electrons in Atom B That are Shared With Atom A page S-15.

| Molecule                           | $ \mu_{zz}(\Omega)^{\text{intra}} $ | $ \mu_{zz}(\Omega \Omega') $ |
|------------------------------------|-------------------------------------|------------------------------|
| $\text{Al}_4^{2-}$                 | 0.000                               | 0.000                        |
| $\text{Al}_4^{2-}(\pi)$            | 0.000                               | 0.000                        |
| $\text{Al}_4^{2-}(\sigma)$         | 0.000                               | 0.000                        |
| <br>                               |                                     |                              |
| $\text{LiAl}_4^-$                  | 0.622                               | 0.010                        |
| $\text{LiAl}_4^-(\pi)$             | 0.041                               | 0.070                        |
| $\text{LiAl}_4^-(\sigma)$          | 0.581                               | 0.003                        |
| <br>                               |                                     |                              |
| $\text{Li}_2\text{Al}_4$           | 0.004                               | 0.000                        |
| $\text{Li}_2\text{Al}_4^-(\pi)$    | 0.002                               | 0.000                        |
| $\text{Li}_2\text{Al}_4^-(\sigma)$ | 0.002                               | 0.000                        |
| <br>                               |                                     |                              |
| $\text{NaAl}_4^-$                  | 0.427                               | 0.004                        |
| $\text{NaAl}_4^-(\pi)$             | 0.005                               | 0.000                        |
| $\text{NaAl}_4^-(\sigma)$          | 0.422                               | 0.004                        |
| <br>                               |                                     |                              |
| $\text{Na}_2\text{Al}_4$           | 0.000                               | 0.000                        |
| $\text{Na}_2\text{Al}_4^-(\pi)$    | 0.000                               | 0.000                        |
| $\text{Na}_2\text{Al}_4^-(\sigma)$ | 0.000                               | 0.000                        |
| <br>                               |                                     |                              |
| $\text{KAl}_4^-$                   | 0.347                               | 0.008                        |
| $\text{KAl}_4^-(\pi)$              | 0.034                               | 0.003                        |
| $\text{KAl}_4^-(\sigma)$           | 0.313                               | 0.005                        |
| <br>                               |                                     |                              |
| $\text{K}_2\text{Al}_4$            | 0.000                               | 0.000                        |
| $\text{K}_2\text{Al}_4^-(\pi)$     | 0.000                               | 0.000                        |
| $\text{K}_2\text{Al}_4^-(\sigma)$  | 0.000                               | 0.000                        |
| <br>                               |                                     |                              |
| $\text{MgAl}_4$                    | 0.428                               | 0.010                        |
| $\text{MgAl}_4(\pi)$               | 0.273                               | 0.032                        |
| $\text{MgAl}_4(\sigma)$            | 0.701                               | 0.022                        |
| <br>                               |                                     |                              |
| $\text{CaAl}_4$                    | 0.518                               | 0.029                        |
| $\text{CaAl}_4(\pi)$               | 0.018                               | 0.014                        |
| $\text{CaAl}_4(\sigma)$            | 0.536                               | 0.015                        |

a. Average values

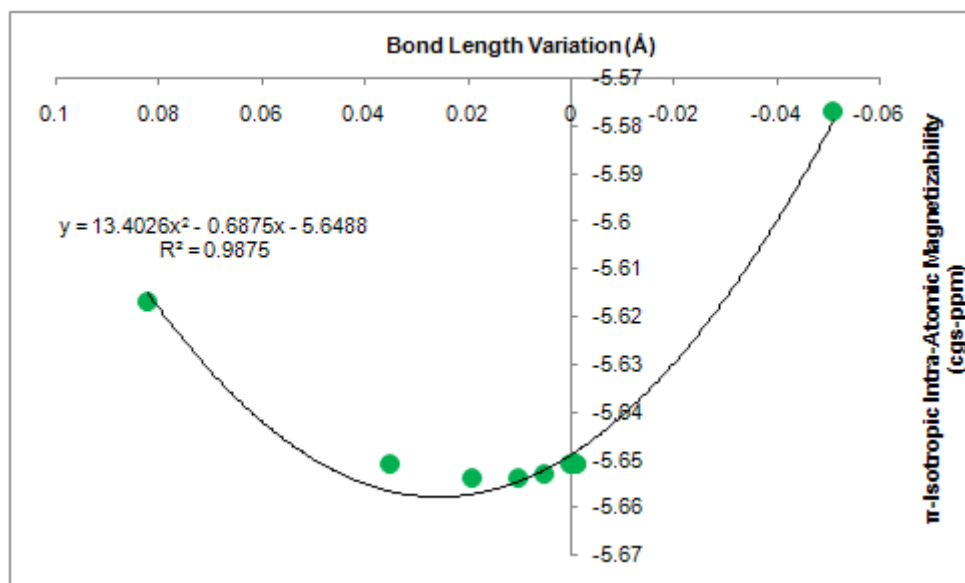

Figure S-1

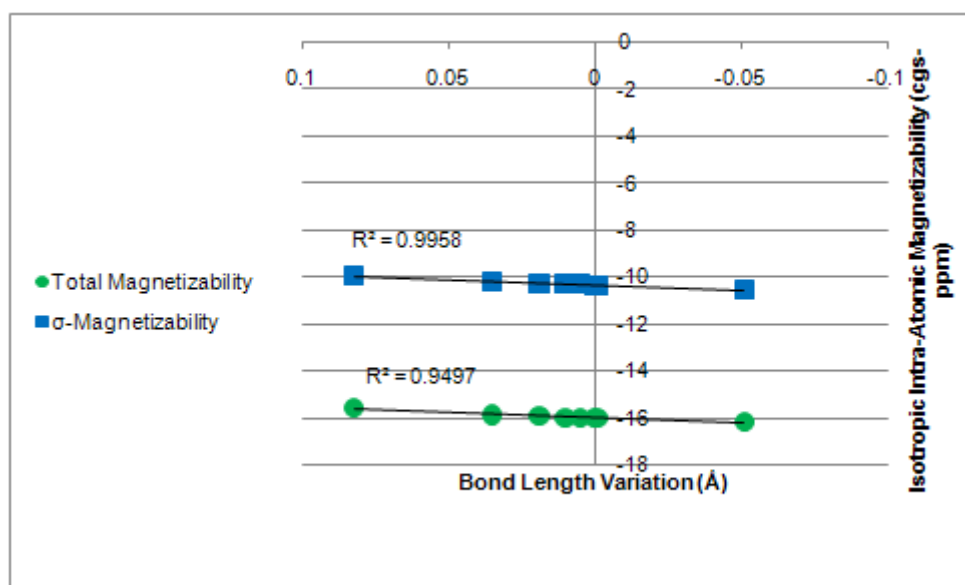

Figure S-2

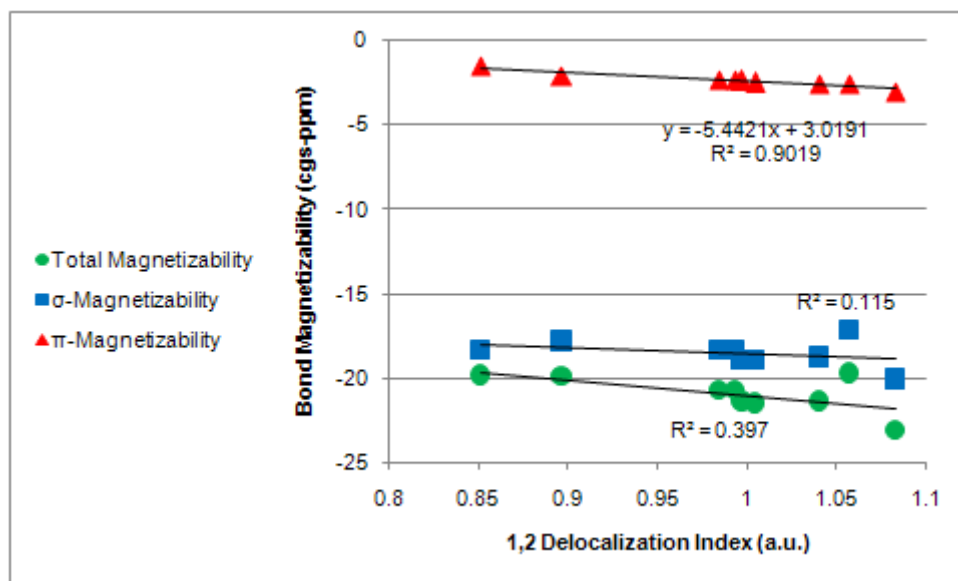

Figure S-3

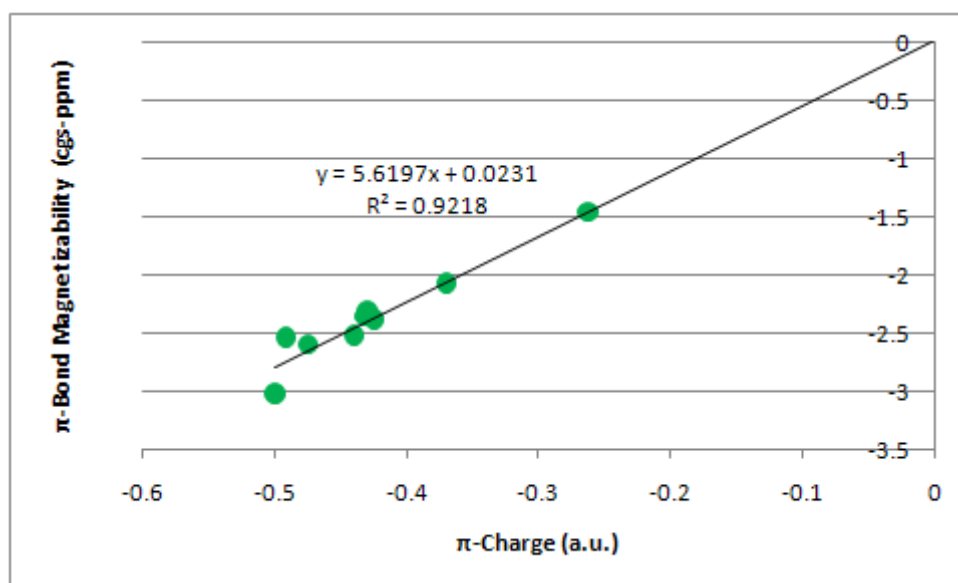

Figure S-4

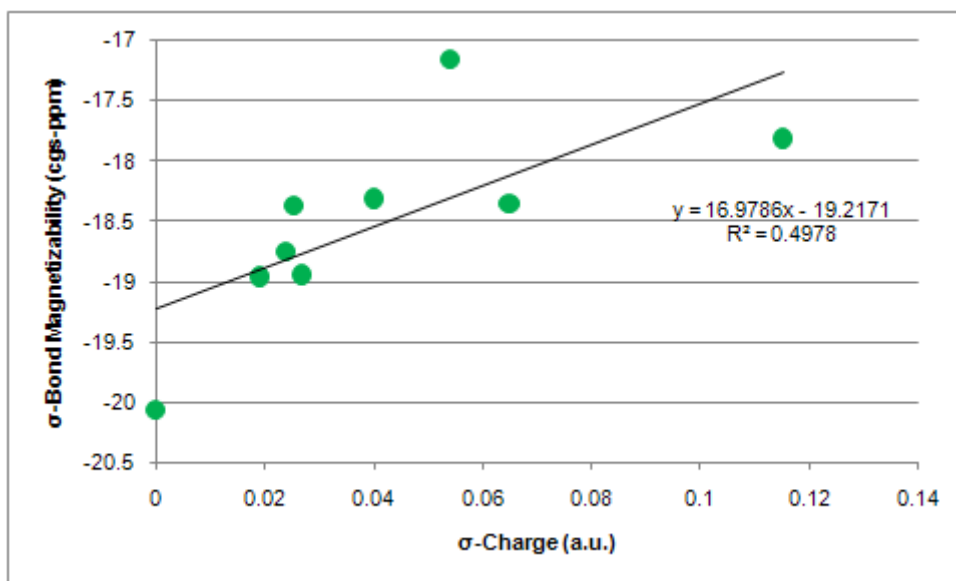

Figure S-5

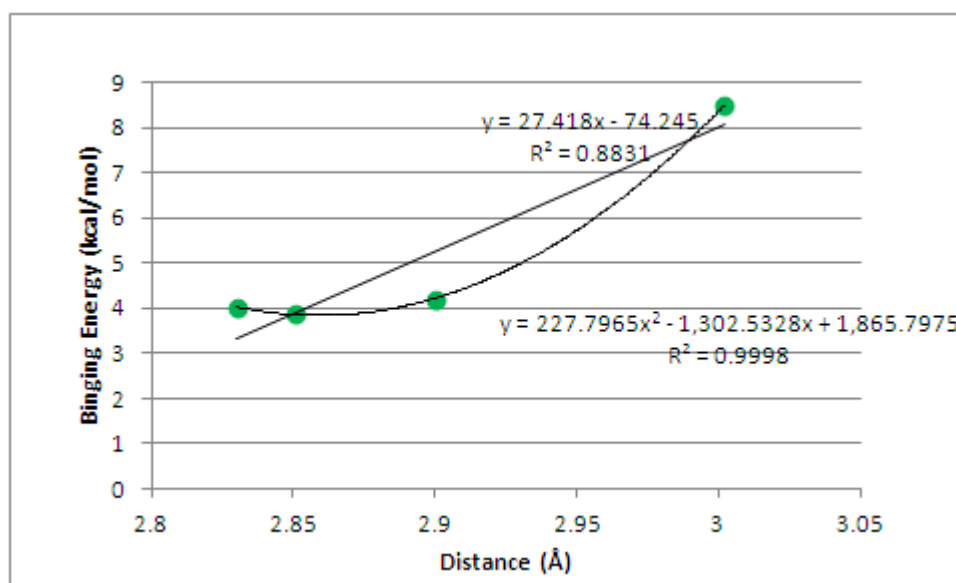

Figure S-6

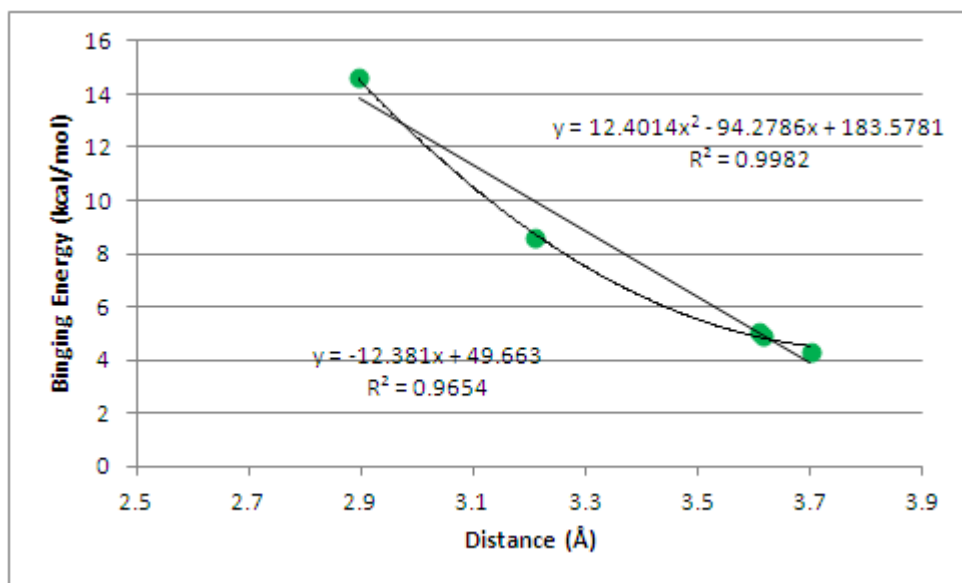

Figure S-7

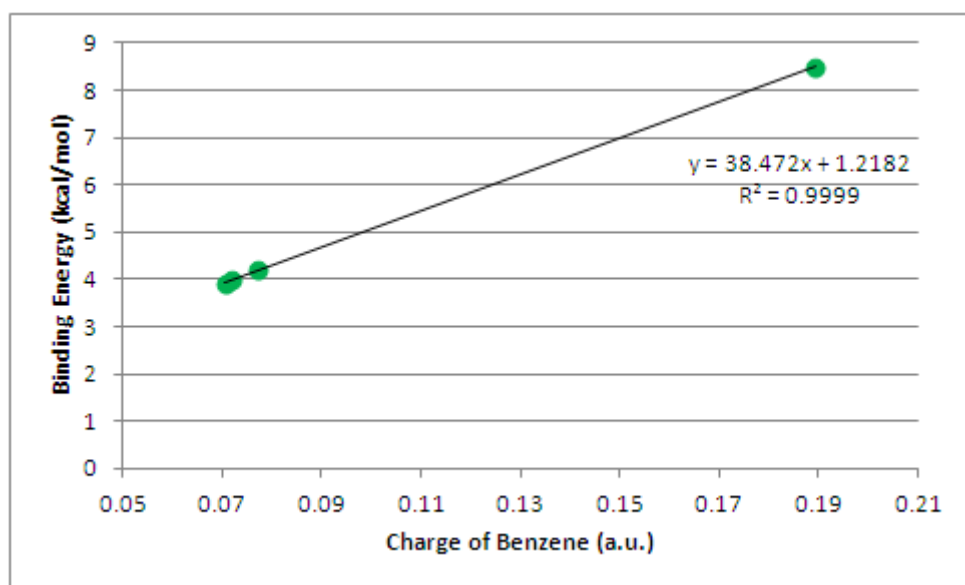

Figure S-8

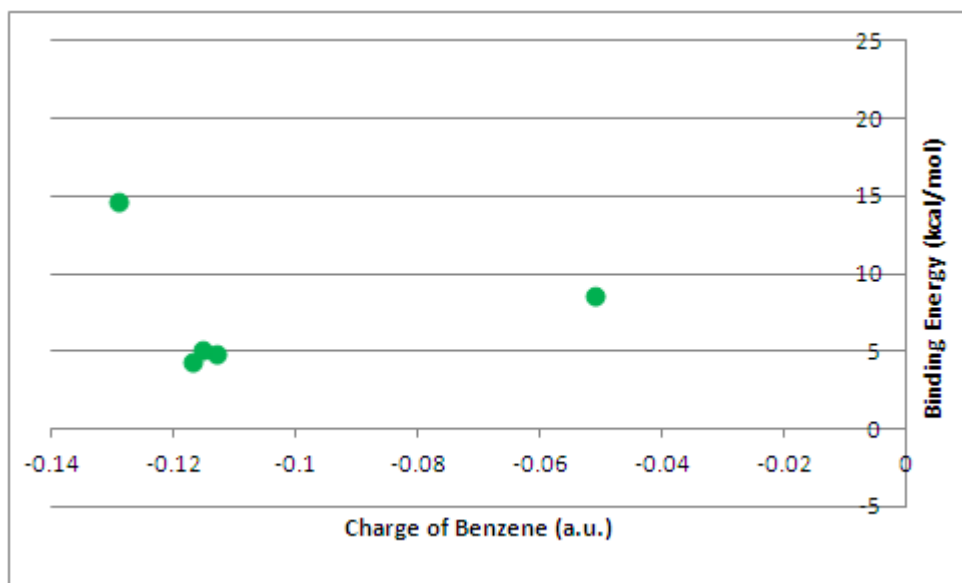

Figure S-9



$\text{Al}_4^{2-}$

|    |              |              |             |
|----|--------------|--------------|-------------|
| 13 | 0.000000000  | 1.812632218  | 0.000000000 |
| 13 | 1.812632218  | 0.000000000  | 0.000000000 |
| 13 | -1.812632218 | 0.000000000  | 0.000000000 |
| 13 | 0.000000000  | -1.812632218 | 0.000000000 |

$\text{LiAl}_4^-$

|    |              |              |              |
|----|--------------|--------------|--------------|
| 13 | 0.000000000  | 1.810325137  | -0.120052009 |
| 13 | -1.810325137 | 0.000000000  | -0.120052009 |
| 13 | 1.810325137  | 0.000000000  | -0.120052009 |
| 13 | 0.000000000  | -1.810325137 | -0.120052009 |
| 3  | 0.000000000  | 0.000000000  | 2.080896158  |

$\text{Li}_2\text{Al}_4$

|    |              |              |              |
|----|--------------|--------------|--------------|
| 13 | -1.210691626 | 1.281202785  | 0.199393137  |
| 13 | 1.197852728  | 1.284810552  | -0.200515724 |
| 13 | -1.197834122 | -1.284801757 | 0.200647570  |
| 13 | 1.210672798  | -1.281196192 | -0.199523719 |
| 3  | 3.421778765  | 0.015326589  | 0.610079677  |
| 3  | -3.421777823 | -0.015393267 | -0.610085154 |

$\text{NaAl}_4^-$

|    |              |              |              |
|----|--------------|--------------|--------------|
| 13 | 0.000000000  | 1.813309136  | -0.444291034 |
| 13 | -1.813309136 | 0.000000000  | -0.444291034 |
| 13 | 1.813309136  | 0.000000000  | -0.444291034 |
| 13 | 0.000000000  | -1.813309136 | -0.444291034 |
| 11 | 0.000000000  | 0.000000000  | 2.100286160  |

$\text{Na}_2\text{Al}_4$

|    |              |              |              |
|----|--------------|--------------|--------------|
| 13 | 0.000000000  | 1.820069984  | 0.000000000  |
| 13 | -1.820069984 | 0.000000000  | 0.000000000  |
| 13 | 1.820069984  | 0.000000000  | 0.000000000  |
| 13 | 0.000000000  | -1.820069984 | 0.000000000  |
| 11 | 0.000000000  | 0.000000000  | 2.586693928  |
| 11 | 0.000000000  | 0.000000000  | -2.586693928 |

$\text{KAl}_4^-$

|    |              |              |              |
|----|--------------|--------------|--------------|
| 13 | 0.000000000  | 1.805964140  | -0.781585060 |
| 13 | -1.805964140 | 0.000000000  | -0.781585060 |
| 13 | 1.805964140  | 0.000000000  | -0.781585060 |
| 13 | 0.000000000  | -1.805964140 | -0.781585060 |
| 19 | 0.000000000  | 0.000000000  | 2.139074164  |

### K<sub>2</sub>Al<sub>4</sub>

|    |              |              |              |
|----|--------------|--------------|--------------|
| 13 | -0.000000422 | 1.805590372  | 0.000000000  |
| 13 | -1.805590372 | -0.000000422 | 0.000000000  |
| 13 | 1.805590372  | 0.000000422  | 0.000000000  |
| 13 | 0.000000422  | -1.805590372 | 0.000000000  |
| 19 | 0.000000000  | 0.000000000  | 2.992914277  |
| 19 | 0.000000000  | 0.000000000  | -2.992914277 |

### BeAl<sub>4</sub>

|    |              |              |             |
|----|--------------|--------------|-------------|
| 13 | 2.134531000  | 0.212700000  | 0.000000000 |
| 13 | 0.000000000  | 1.420864000  | 0.000000000 |
| 13 | 0.372707000  | -1.559301000 | 0.000000000 |
| 13 | -1.845769000 | -0.594103000 | 0.000000000 |
| 4  | -2.149775000 | 1.689483000  | 0.000000000 |

### MgAl<sub>4</sub>

|    |              |              |              |
|----|--------------|--------------|--------------|
| 13 | 0.000000000  | 1.864442142  | -0.396056030 |
| 13 | -1.864442142 | 0.000000000  | -0.396056030 |
| 13 | 1.864442142  | 0.000000000  | -0.396056030 |
| 13 | 0.000000000  | -1.864442142 | -0.396056030 |
| 12 | 0.000000000  | 0.000000000  | 1.716243132  |

### CaAl<sub>4</sub>

|    |              |              |              |
|----|--------------|--------------|--------------|
| 13 | 0.000000000  | 1.831336141  | -0.655418049 |
| 13 | -1.831336141 | 0.000000000  | -0.655418049 |
| 13 | 1.831336141  | 0.000000000  | -0.655418049 |
| 13 | 0.000000000  | -1.831336141 | -0.655418049 |
| 20 | 0.000000000  | 0.000000000  | 1.704087132  |

### T-shaped Benzene-LiAl<sub>4</sub><sup>-</sup>

|    |              |              |              |
|----|--------------|--------------|--------------|
| 13 | 2.238473205  | 0.982263609  | -1.523036418 |
| 13 | 2.231333159  | -1.521286471 | -0.982018076 |
| 13 | 2.243839845  | 1.519934651  | 0.983454427  |
| 13 | 2.231462437  | -0.984004555 | 1.524798033  |
| 6  | -3.773282044 | 1.205431985  | 0.004961232  |
| 6  | -2.387017910 | 1.197999955  | -0.002614904 |
| 6  | -1.700918276 | -0.005243690 | -0.008461149 |
| 6  | -2.399154918 | -1.201657671 | -0.007031482 |
| 6  | -3.785380311 | -1.196230757 | 0.000420010  |
| 6  | -4.472836449 | 0.007994748  | 0.005997129  |
| 1  | -4.312151698 | 2.146791209  | 0.009751809  |
| 1  | -1.829383445 | 2.128449153  | -0.003391643 |
| 1  | -0.614216456 | -0.010812993 | -0.014563495 |
| 1  | -1.850605236 | -2.137497587 | -0.010968538 |

|   |              |              |             |
|---|--------------|--------------|-------------|
| 1 | -4.333009896 | -2.132436356 | 0.001168445 |
| 1 | -5.557547159 | 0.013745530  | 0.011904864 |
| 3 | 4.440680295  | -0.005933462 | 0.001633333 |

PPS Benzene-LiAl<sub>4</sub><sup>-</sup>

|    |              |              |              |
|----|--------------|--------------|--------------|
| 13 | 0.000000000  | 1.805526881  | 1.490641377  |
| 13 | 1.811433325  | 0.000137321  | 1.497596666  |
| 13 | -1.811433325 | -0.000137321 | 1.497596666  |
| 13 | 0.000000000  | -1.805526881 | 1.490641377  |
| 6  | -1.326541369 | 0.401365720  | -2.121975913 |
| 6  | -0.315269131 | 1.349333086  | -2.120431663 |
| 6  | 1.011813634  | 0.948665706  | -2.117319132 |
| 6  | 1.326541369  | -0.401365720 | -2.121975913 |
| 6  | 0.315269131  | -1.349333086 | -2.120431663 |
| 6  | -1.011813634 | -0.948665706 | -2.117319132 |
| 1  | -2.363245659 | 0.716636236  | -2.093452640 |
| 1  | -0.562618902 | 2.404521167  | -2.092186420 |
| 1  | 1.801781116  | 1.690205342  | -2.083635169 |
| 1  | 2.363245659  | -0.716636236 | -2.093452640 |
| 1  | 0.562618902  | -2.404521167 | -2.092186420 |
| 1  | -1.801781116 | -1.690205342 | -2.083635169 |
| 3  | 0.000000000  | 0.000000000  | 3.720359953  |

T-shaped Benzene-NaAl<sub>4</sub><sup>-</sup>

|    |              |              |              |
|----|--------------|--------------|--------------|
| 13 | 0.948961125  | 1.548790876  | 1.852653073  |
| 13 | -1.546659266 | 0.945266113  | 1.855124072  |
| 13 | 1.546659266  | -0.945266113 | 1.855124072  |
| 13 | -0.948961125 | -1.548790876 | 1.852653073  |
| 1  | 0.000000000  | 0.000000000  | -0.976245144 |
| 6  | 0.000000000  | 0.000000000  | -2.063086227 |
| 6  | -1.199774170 | 0.004594050  | -2.755452278 |
| 6  | 1.199774170  | -0.004594050 | -2.755452278 |
| 1  | -2.133360765 | 0.009046711  | -2.203370237 |
| 1  | 2.133360765  | -0.009046711 | -2.203370237 |
| 6  | -1.200684112 | 0.004351940  | -4.141711384 |
| 6  | 1.200684112  | -0.004351940 | -4.141711384 |
| 1  | -2.139646734 | 0.007883501  | -4.684631430 |
| 1  | 2.139646734  | -0.007883501 | -4.684631430 |
| 6  | 0.000000000  | 0.000000000  | -4.835377438 |
| 1  | 0.000000000  | 0.000000000  | -5.920043524 |
| 11 | 0.000000000  | 0.000000000  | 4.402439264  |

PPS Benzene-NaAl<sub>4</sub><sup>-</sup>

|    |              |              |             |
|----|--------------|--------------|-------------|
| 13 | -0.404999416 | -1.768046669 | 1.172947440 |
|----|--------------|--------------|-------------|

|    |              |              |              |
|----|--------------|--------------|--------------|
| 13 | -1.766607397 | 0.404181619  | 1.172441520  |
| 13 | 1.766607397  | -0.404181619 | 1.172441520  |
| 13 | 0.404999416  | 1.768046669  | 1.172947440  |
| 6  | 1.200360769  | -0.693079276 | -2.435848778 |
| 6  | 0.000000000  | -1.385891011 | -2.436212815 |
| 6  | -1.201092568 | -0.693595737 | -2.433484795 |
| 6  | -1.200360769 | 0.693079276  | -2.435848778 |
| 6  | 0.000000000  | 1.385891011  | -2.436212815 |
| 6  | 1.201092568  | 0.693595737  | -2.433484795 |
| 1  | 2.137895972  | -1.236549513 | -2.406769790 |
| 1  | 0.000748321  | -2.469644122 | -2.407465859 |
| 1  | -2.139509021 | -1.235119543 | -2.400354823 |
| 1  | -2.137895972 | 1.236549513  | -2.406769790 |
| 1  | -0.000748321 | 2.469644122  | -2.407465859 |
| 1  | 2.139509021  | 1.235119543  | -2.400354823 |
| 11 | 0.000000000  | 0.000000000  | 3.737783712  |

T-shaped Benzene-KAl<sub>4</sub><sup>-</sup>

|    |              |              |              |
|----|--------------|--------------|--------------|
| 13 | 0.000000000  | 1.808318137  | 1.503942115  |
| 13 | -1.804330136 | -0.001390000 | 1.505837115  |
| 13 | 1.804330136  | 0.001390000  | 1.505837115  |
| 13 | 0.000000000  | -1.808318137 | 1.503942115  |
| 1  | 0.000000000  | 0.000000000  | -1.395365109 |
| 6  | 0.000000000  | 0.000000000  | -2.482399188 |
| 6  | -1.033494079 | 0.608899045  | -3.175152242 |
| 6  | 1.033494079  | -0.608899045 | -3.175152242 |
| 1  | -1.837092140 | 1.083170085  | -2.622173199 |
| 1  | 1.837092140  | -1.083170085 | -2.622173199 |
| 6  | -1.034566081 | 0.609297045  | -4.561444348 |
| 6  | 1.034566081  | -0.609297045 | -4.561444348 |
| 1  | -1.843687138 | 1.085942085  | -5.104396388 |
| 1  | 1.843687138  | -1.085942085 | -5.104396388 |
| 6  | 0.000000000  | 0.000000000  | -5.255365402 |
| 1  | 0.000000000  | 0.000000000  | -6.340116489 |
| 19 | 0.000000000  | 0.000000000  | 4.431585336  |

PPS Benzene-KAl<sub>4</sub><sup>-</sup>

|    |              |              |              |
|----|--------------|--------------|--------------|
| 13 | -1.807137591 | 0.000244038  | 0.877900854  |
| 13 | 0.000000000  | 1.804989025  | 0.877458854  |
| 13 | 0.000000000  | -1.804989025 | 0.877458854  |
| 13 | 1.807137591  | -0.000244038 | 0.877900854  |
| 6  | -0.368735728 | -1.335624898 | -2.821034426 |
| 6  | -1.341072682 | -0.348369207 | -2.821594428 |
| 6  | -0.973104800 | 0.987835967  | -2.820193426 |

|    |              |              |              |
|----|--------------|--------------|--------------|
| 6  | 0.368735728  | 1.335624898  | -2.821034426 |
| 6  | 1.341072682  | 0.348369207  | -2.821594428 |
| 6  | 0.973104800  | -0.987835967 | -2.820193426 |
| 1  | -0.658716575 | -2.379613482 | -2.787851425 |
| 1  | -2.389633856 | -0.621647258 | -2.788837425 |
| 1  | -1.733127384 | 1.759860027  | -2.783661426 |
| 1  | 0.658716575  | 2.379613482  | -2.787851425 |
| 1  | 2.389633856  | 0.621647258  | -2.788837425 |
| 1  | 1.733127384  | -1.759860027 | -2.783661426 |
| 19 | 0.000000000  | 0.000000000  | 3.822906079  |

PPS Benzene-MgAl<sub>4</sub>

|    |              |              |              |
|----|--------------|--------------|--------------|
| 13 | -0.458772114 | 1.792625593  | 0.904462118  |
| 13 | 1.788991235  | 0.458866811  | 0.900127855  |
| 13 | -1.788991235 | -0.458866811 | 0.900127855  |
| 13 | 0.458772114  | -1.792625593 | 0.904462118  |
| 6  | -1.391566013 | -0.000153738 | -1.996627470 |
| 6  | -0.696639427 | 1.204257217  | -1.996100399 |
| 6  | 0.696642438  | 1.207854818  | -1.988403849 |
| 6  | 1.391566013  | 0.000153738  | -1.996627470 |
| 6  | 0.696639427  | -1.204257217 | -1.996100399 |
| 6  | -0.696642438 | -1.207854818 | -1.988403849 |
| 1  | -2.474207106 | 0.001984531  | -2.050285181 |
| 1  | -1.241423748 | 2.139936453  | -2.048631751 |
| 1  | 1.237020210  | 2.145990384  | -2.024051446 |
| 1  | 2.474207106  | -0.001984531 | -2.050285181 |
| 1  | 1.241423748  | -2.139936453 | -2.048631751 |
| 1  | -1.237020210 | -2.145990384 | -2.024051446 |
| 12 | 0.000000000  | 0.000000000  | 3.091671436  |

PPS Benzene-CaAl<sub>4</sub>

|    |              |              |              |
|----|--------------|--------------|--------------|
| 13 | 0.000000000  | 1.837521165  | 0.757874109  |
| 13 | 1.841519734  | 0.000208109  | 0.762512072  |
| 13 | -1.841519734 | -0.000208109 | 0.762512072  |
| 13 | 0.000000000  | -1.837521165 | 0.757874109  |
| 6  | -1.308256962 | 0.464965693  | -2.449730198 |
| 6  | -0.251428613 | 1.364925754  | -2.450901151 |
| 6  | 1.057092029  | 0.901034912  | -2.448085150 |
| 6  | 1.308256962  | -0.464965693 | -2.449730198 |
| 6  | 0.251428613  | -1.364925754 | -2.450901151 |
| 6  | -1.057092029 | -0.901034912 | -2.448085150 |
| 1  | -2.328725184 | 0.829915596  | -2.466024200 |
| 1  | -0.448549369 | 2.430679055  | -2.470716124 |
| 1  | 1.881636645  | 1.604142679  | -2.458111122 |
| 1  | 2.328725184  | -0.829915596 | -2.466024200 |

|    |              |              |              |
|----|--------------|--------------|--------------|
| 1  | 0.448549369  | -2.430679055 | -2.470716124 |
| 1  | -1.881636645 | -1.604142679 | -2.458111122 |
| 20 | 0.000000000  | 0.000000000  | 3.172213234  |

### Al<sub>4</sub><sup>2-</sup>

| Atom A | Atom B | 2*D2(A,B)        | DI(A,B)          | %Deloc(A,B)      | %Deloc(B,A)               |
|--------|--------|------------------|------------------|------------------|---------------------------|
| Al1    | Al2    | 1.8170299789E+02 | 1.0827279957E+00 | 4.0101657182E+00 | 4.0101657177E+00 (Bonded) |
| Al1    | Al3    | 1.8170299789E+02 | 1.0827279957E+00 | 4.0101657182E+00 | 4.0101657177E+00 (Bonded) |
| Al2    | Al3    | 1.8184004039E+02 | 8.0864303352E-01 | 2.9950205256E+00 | 2.9950205256E+00          |
| Al1    | Al4    | 1.8184004034E+02 | 8.0864303332E-01 | 2.9950205253E+00 | 2.9950205253E+00          |
| Al2    | Al4    | 1.8170299789E+02 | 1.0827279957E+00 | 4.0101657177E+00 | 4.0101657182E+00 (Bonded) |
| Al3    | Al4    | 1.8170299789E+02 | 1.0827279957E+00 | 4.0101657177E+00 | 4.0101657182E+00 (Bonded) |

### LiAl<sub>4</sub><sup>-</sup>

| Atom A | Atom B | 2*D2(A,B)        | DI(A,B)          | %Deloc(A,B)      | %Deloc(B,A)               |
|--------|--------|------------------|------------------|------------------|---------------------------|
| Al1    | Al2    | 1.8041858842E+02 | 1.0401528221E+00 | 3.8663519879E+00 | 3.8663533465E+00 (Bonded) |
| Al1    | Al3    | 1.8041861149E+02 | 1.0401486354E+00 | 3.8663364253E+00 | 3.8663373356E+00 (Bonded) |
| Al2    | Al3    | 1.8055810191E+02 | 7.6104063989E-01 | 2.8288651074E+00 | 2.8288647794E+00          |
| Al1    | Al4    | 1.8055810820E+02 | 7.6104010717E-01 | 2.8288621332E+00 | 2.8288636991E+00          |
| Al2    | Al4    | 1.8041849134E+02 | 1.0401466713E+00 | 3.8663304832E+00 | 3.8663312648E+00 (Bonded) |
| Al3    | Al4    | 1.8041851053E+02 | 1.0401502503E+00 | 3.8663433385E+00 | 3.8663445684E+00 (Bonded) |
| Al1    | Li5    | 2.9425308915E+01 | 9.6153182819E-02 | 3.5741098964E-01 | 2.1941656473E+00          |
| Al2    | Li5    | 2.9425298719E+01 | 9.6152860439E-02 | 3.5740991691E-01 | 2.1941582907E+00 (Bonded) |
| Al3    | Li5    | 2.9425302045E+01 | 9.6153044985E-02 | 3.5741056145E-01 | 2.1941625020E+00          |
| Al4    | Li5    | 2.9425292594E+01 | 9.6153194566E-02 | 3.5741123115E-01 | 2.1941659153E+00          |

### Li<sub>2</sub>Al<sub>4</sub>

| Atom A | Atom B | 2*D2(A,B)        | DI(A,B)          | %Deloc(A,B)      | %Deloc(B,A)               |
|--------|--------|------------------|------------------|------------------|---------------------------|
| Al1    | Al2    | 1.8001832483E+02 | 1.0888135340E+00 | 4.0514878870E+00 | 4.0513929562E+00 (Bonded) |
| Al1    | Al3    | 1.8005036762E+02 | 1.0246654213E+00 | 3.8127920099E+00 | 3.8127033322E+00 (Bonded) |
| Al2    | Al3    | 1.8019453571E+02 | 7.4479100473E-01 | 2.7713110980E+00 | 2.7713115778E+00          |
| Al1    | Al4    | 1.8018675571E+02 | 7.4327891618E-01 | 2.7657495352E+00 | 2.7657511534E+00          |
| Al2    | Al4    | 1.8005029555E+02 | 1.0246607950E+00 | 3.8126854578E+00 | 3.8127770262E+00 (Bonded) |
| Al3    | Al4    | 1.8001818566E+02 | 1.0888180609E+00 | 4.0514105018E+00 | 4.0515071020E+00 (Bonded) |
| Al1    | Li5    | 2.8540689459E+01 | 2.9451347065E-02 | 1.0958880668E-01 | 6.9294004476E-01          |
| Al2    | Li5    | 2.8505467298E+01 | 1.0123387223E-01 | 3.7668359556E-01 | 2.3818606259E+00 (Bonded) |
| Al3    | Li5    | 2.8541286878E+01 | 2.9584821233E-02 | 1.1008290526E-01 | 6.9608046465E-01          |
| Al4    | Li5    | 2.8505019355E+01 | 1.0075814077E-01 | 3.7492243890E-01 | 2.3706674746E+00          |
| Al1    | Li6    | 2.8505041210E+01 | 1.0076062790E-01 | 3.7493147419E-01 | 2.3707254621E+00          |
| Al2    | Li6    | 2.8541297681E+01 | 2.9585886800E-02 | 1.1008685109E-01 | 6.9610537984E-01          |
| Al3    | Li6    | 2.8505469279E+01 | 1.0123280082E-01 | 3.7667967414E-01 | 2.3818348844E+00 (Bonded) |
| Al4    | Li6    | 2.8540679628E+01 | 2.9450376322E-02 | 1.0958525865E-01 | 6.9291704976E-01          |
| Li5    | Li6    | 4.5151618591E+00 | 1.7840167735E-03 | 4.1974876740E-02 | 4.1974867346E-02          |

### NaAl<sub>4</sub><sup>-</sup>

| Atom A | Atom B | 2*D2(A,B)        | DI(A,B)          | %Deloc(A,B)      | %Deloc(B,A)               |
|--------|--------|------------------|------------------|------------------|---------------------------|
| Al1    | Al2    | 1.7921647044E+02 | 9.9704716011E-01 | 3.7187203207E+00 | 3.7187208655E+00 (Bonded) |
| Al1    | Al3    | 1.7921652412E+02 | 9.9705092495E-01 | 3.7187343626E+00 | 3.7187337578E+00 (Bonded) |
| Al2    | Al3    | 1.7935598557E+02 | 7.1807535685E-01 | 2.6782301975E+00 | 2.6782293696E+00          |
| Al1    | Al4    | 1.7935599833E+02 | 7.1807604197E-01 | 2.6782323604E+00 | 2.6782321221E+00          |
| Al2    | Al4    | 1.7921648503E+02 | 9.9704998128E-01 | 3.7187313878E+00 | 3.7187305120E+00 (Bonded) |
| Al3    | Al4    | 1.7921654133E+02 | 9.9704850079E-01 | 3.7187247163E+00 | 3.7187249901E+00 (Bonded) |
| Al1    | Na5    | 1.3897880156E+02 | 1.7296587895E-01 | 6.4511665505E-01 | 8.3368867513E-01          |
| Al2    | Na5    | 1.3897878106E+02 | 1.7296612960E-01 | 6.4511768441E-01 | 8.3368988323E-01          |
| Al3    | Na5    | 1.3897882435E+02 | 1.7296553797E-01 | 6.4511527837E-01 | 8.3368703162E-01          |
| Al4    | Na5    | 1.3897881384E+02 | 1.7296608758E-01 | 6.4511737575E-01 | 8.3368968070E-01 (Bonded) |

### Na<sub>2</sub>Al<sub>4</sub>

| Atom A | Atom B | 2*D2(A,B)        | DI(A,B)          | %Deloc(A,B)      | %Deloc(B,A)               |
|--------|--------|------------------|------------------|------------------|---------------------------|
| Al1    | Al2    | 1.7918637941E+02 | 9.9326235382E-01 | 3.7049338979E+00 | 3.7049340351E+00 (Bonded) |
| Al1    | Al3    | 1.7918636276E+02 | 9.9324407008E-01 | 3.7048656984E+00 | 3.7048663673E+00 (Bonded) |
| Al2    | Al3    | 1.7932401708E+02 | 7.1792212483E-01 | 2.6778968362E+00 | 2.6778972206E+00          |
| Al1    | Al4    | 1.7932402246E+02 | 7.1792221487E-01 | 2.6778970729E+00 | 2.6778975748E+00          |
| Al2    | Al4    | 1.7918635433E+02 | 9.9324517056E-01 | 3.7048699404E+00 | 3.7048704975E+00 (Bonded) |
| Al3    | Al4    | 1.7918632076E+02 | 9.9326071183E-01 | 3.7049284421E+00 | 3.7049284675E+00 (Bonded) |
| Al1    | Na5    | 1.3654974773E+02 | 9.5822993890E-02 | 3.5742606865E-01 | 4.7016467793E-01 (Bonded) |
| Al2    | Na5    | 1.3654974252E+02 | 9.5823280281E-02 | 3.5742715014E-01 | 4.7016608313E-01          |
| Al3    | Na5    | 1.3654972280E+02 | 9.5823510404E-02 | 3.5742805982E-01 | 4.7016721226E-01          |
| Al4    | Na5    | 1.3654972179E+02 | 9.5823666093E-02 | 3.5742864300E-01 | 4.7016797616E-01          |
| Al1    | Na6    | 1.3654974711E+02 | 9.5824231926E-02 | 3.5743068660E-01 | 4.7017075247E-01 (Bonded) |
| Al2    | Na6    | 1.3654974222E+02 | 9.5823886102E-02 | 3.5742940989E-01 | 4.7016905566E-01          |
| Al3    | Na6    | 1.3654972255E+02 | 9.5824013156E-02 | 3.5742993511E-01 | 4.7016967906E-01          |
| Al4    | Na6    | 1.3654972163E+02 | 9.5823982499E-02 | 3.5742982321E-01 | 4.7016952864E-01          |
| Na5    | Na6    | 1.0383457124E+02 | 1.7936597559E-02 | 8.8007630240E-02 | 8.8007630240E-02          |

### KAl<sub>4</sub><sup>-</sup>

| Atom A | Atom B | 2*D2(A,B)        | DI(A,B)          | %Deloc(A,B)      | %Deloc(B,A)               |
|--------|--------|------------------|------------------|------------------|---------------------------|
| Al1    | Al2    | 1.7942000904E+02 | 1.0045105432E+00 | 3.7443991721E+00 | 3.7443976057E+00 (Bonded) |
| Al1    | Al3    | 1.7941997998E+02 | 1.0045094428E+00 | 3.7443950705E+00 | 3.7443941203E+00 (Bonded) |
| Al2    | Al3    | 1.7956044667E+02 | 7.2372660687E-01 | 2.6977518478E+00 | 2.6977522918E+00          |
| Al1    | Al4    | 1.7956042960E+02 | 7.2372589216E-01 | 2.6977503121E+00 | 2.6977487603E+00          |
| Al2    | Al4    | 1.7942011090E+02 | 1.0045138189E+00 | 3.7444098162E+00 | 3.7444092287E+00 (Bonded) |
| Al3    | Al4    | 1.7942008169E+02 | 1.0045130180E+00 | 3.7444074469E+00 | 3.7444062432E+00 (Bonded) |
| Al1    | K5     | 2.4592741107E+02 | 1.8021212903E-01 | 6.7175616158E-01 | 4.9128143600E-01          |
| Al2    | K5     | 2.4592751371E+02 | 1.8021267995E-01 | 6.7175793414E-01 | 4.9128293786E-01          |
| Al3    | K5     | 2.4592747352E+02 | 1.8021207845E-01 | 6.7175580259E-01 | 4.9128129812E-01          |
| Al4    | K5     | 2.4592755214E+02 | 1.8021302075E-01 | 6.7175909910E-01 | 4.9128386693E-01 (Bonded) |

### K<sub>2</sub>Al<sub>4</sub>

| Atom A | Atom B | 2*D2(A,B)        | DI(A,B)          | %Deloc(A,B)      | %Deloc(B,A)               |
|--------|--------|------------------|------------------|------------------|---------------------------|
| Al1    | Al2    | 1.7884319241E+02 | 9.8416280442E-01 | 3.6745493429E+00 | 3.6745494761E+00 (Bonded) |
| Al1    | Al3    | 1.7884321789E+02 | 9.8416291594E-01 | 3.6745497593E+00 | 3.6745493691E+00 (Bonded) |
| Al2    | Al3    | 1.7898381830E+02 | 7.0294909937E-01 | 2.6245873480E+00 | 2.6245869742E+00          |
| Al1    | Al4    | 1.7898383443E+02 | 7.0294944896E-01 | 2.6245885581E+00 | 2.6245881359E+00          |
| Al2    | Al4    | 1.7884322078E+02 | 9.8416374855E-01 | 3.6745530012E+00 | 3.6745522769E+00 (Bonded) |
| Al3    | Al4    | 1.7884324618E+02 | 9.8416403888E-01 | 3.6745535618E+00 | 3.6745533609E+00 (Bonded) |
| Al1    | K5     | 2.4388600037E+02 | 1.2129774306E-01 | 4.5288700208E-01 | 3.3293598300E-01          |
| Al2    | K5     | 2.4388599159E+02 | 1.2129762481E-01 | 4.5288657699E-01 | 3.3293565844E-01          |
| Al3    | K5     | 2.4388602633E+02 | 1.2129764336E-01 | 4.5288658173E-01 | 3.3293570934E-01          |
| Al4    | K5     | 2.4388603955E+02 | 1.2129787414E-01 | 4.5288741864E-01 | 3.3293634279E-01 (Bonded) |
| Al1    | K6     | 2.4388600055E+02 | 1.2129738449E-01 | 4.5288566331E-01 | 3.3293499882E-01          |
| Al2    | K6     | 2.4388599179E+02 | 1.2129722058E-01 | 4.5288506774E-01 | 3.3293454892E-01          |
| Al3    | K6     | 2.4388602652E+02 | 1.2129724964E-01 | 4.5288511174E-01 | 3.3293462869E-01          |
| Al4    | K6     | 2.4388603981E+02 | 1.2129736363E-01 | 4.5288551258E-01 | 3.3293494157E-01 (Bonded) |
| K5     | K6     | 3.3182546598E+02 | 2.1799637195E-02 | 5.9835273564E-02 | 5.9835273564E-02          |



### MgAl<sub>4</sub>

| Atom A | Atom B | *D2(A,B)         | DI(A,B)          | %Deloc(A,B)      | %Deloc(B,A)               |
|--------|--------|------------------|------------------|------------------|---------------------------|
| Al1    | Al2    | 1.7376676479E+02 | 8.5095928696E-01 | 3.2237726305E+00 | 3.2237722640E+00 (Bonded) |
| Al1    | Al3    | 1.7376672614E+02 | 8.5096007559E-01 | 3.2237756182E+00 | 3.2237759597E+00 (Bonded) |
| Al2    | Al3    | 1.7389194084E+02 | 6.0057027628E-01 | 2.2751990946E+00 | 2.2751995943E+00          |
| Al1    | Al4    | 1.7389196224E+02 | 6.0057067678E-01 | 2.2752008706E+00 | 2.2752005708E+00          |
| Al2    | Al4    | 1.7376678673E+02 | 8.5096129722E-01 | 3.2237798796E+00 | 3.2237798215E+00 (Bonded) |
| Al3    | Al4    | 1.7376674945E+02 | 8.5095934568E-01 | 3.2237731945E+00 | 3.2237724282E+00 (Bonded) |
| Al1    | Mg5    | 1.4772197453E+02 | 3.7788185601E-01 | 1.4315669429E+00 | 1.6859325745E+00          |
| Al2    | Mg5    | 1.4772199102E+02 | 3.7788251590E-01 | 1.4315692801E+00 | 1.6859355186E+00          |
| Al3    | Mg5    | 1.4772195914E+02 | 3.7788129478E-01 | 1.4315649684E+00 | 1.6859300705E+00          |
| Al4    | Mg5    | 1.4772199376E+02 | 3.7788236569E-01 | 1.4315686852E+00 | 1.6859348484E+00          |

### CaAl<sub>4</sub>

| Atom A | Atom B | *D2(A,B)         | DI(A,B)          | %Deloc(A,B)      | %Deloc(B,A)               |
|--------|--------|------------------|------------------|------------------|---------------------------|
| Al1    | Al2    | 1.7524157282E+02 | 8.9653089082E-01 | 3.3819094020E+00 | 3.3819089644E+00 (Bonded) |
| Al1    | Al3    | 1.7524160181E+02 | 8.9653241340E-01 | 3.3819151455E+00 | 3.3819141353E+00 (Bonded) |
| Al2    | Al3    | 1.7538393558E+02 | 6.1191032576E-01 | 2.3082584630E+00 | 2.3082580722E+00          |
| Al1    | Al4    | 1.7538392521E+02 | 6.1191014141E-01 | 2.3082580663E+00 | 2.3082572156E+00          |
| Al2    | Al4    | 1.7524163652E+02 | 8.9653299019E-01 | 3.3819168836E+00 | 3.3819160750E+00 (Bonded) |
| Al3    | Al4    | 1.7524166648E+02 | 8.9653255462E-01 | 3.3819146680E+00 | 3.3819144319E+00 (Bonded) |
| Al1    | Ca5    | 2.5136623338E+02 | 4.3029097948E-01 | 1.6231511083E+00 | 1.1335144123E+00          |
| Al2    | Ca5    | 2.5136626588E+02 | 4.3029108450E-01 | 1.6231512945E+00 | 1.1335146889E+00          |
| Al3    | Ca5    | 2.5136630830E+02 | 4.3029144998E-01 | 1.6231523983E+00 | 1.1335156517E+00          |
| Al4    | Ca5    | 2.5136632585E+02 | 4.3029146899E-01 | 1.6231523567E+00 | 1.1335157018E+00 (Bonded) |

### Benzene-Al<sub>4</sub><sup>2-</sup> CH-π

| Atom A | Atom B | *D2(A,B)         | DI(A,B)          | %Deloc(A,B)      | %Deloc(B,A)               |
|--------|--------|------------------|------------------|------------------|---------------------------|
| Al1    | Al2    | 1.8045754508E+02 | 1.0335477875E+00 | 3.8420402741E+00 | 3.8408050845E+00 (Bonded) |
| Al1    | Al3    | 1.8045666419E+02 | 1.0353657890E+00 | 3.8487983895E+00 | 3.8475604295E+00 (Bonded) |
| Al2    | Al3    | 1.8065224102E+02 | 7.6061357823E-01 | 2.8265441946E+00 | 2.8265437555E+00          |
| Al1    | Al4    | 1.8053776034E+02 | 7.5675402177E-01 | 2.8131059487E+00 | 2.8131059427E+00          |
| Al2    | Al4    | 1.8045663624E+02 | 1.0353662327E+00 | 3.8475626758E+00 | 3.8488000304E+00 (Bonded) |
| Al3    | Al4    | 1.8045757135E+02 | 1.0335522484E+00 | 3.8408210654E+00 | 3.8420568488E+00 (Bonded) |
| Al1    | H5     | 1.2563886755E+01 | 3.2157895817E-02 | 1.1954157549E-01 | 1.7191620832E+00          |
| Al2    | H5     | 1.2567992151E+01 | 3.2038450315E-02 | 1.1905926785E-01 | 1.7127765231E+00 (Bonded) |
| Al3    | H5     | 1.2567994051E+01 | 3.2038560905E-02 | 1.1905966032E-01 | 1.7127824352E+00          |
| Al4    | H5     | 1.2563886550E+01 | 3.2158360352E-02 | 1.1954330206E-01 | 1.7191869172E+00          |
| Al1    | C6     | 8.0852838786E+01 | 1.4880101215E-02 | 5.5314276556E-02 | 1.2375971710E-01          |
| Al2    | C6     | 8.0879167181E+01 | 1.4232080648E-02 | 5.2888360248E-02 | 1.1837004664E-01          |
| Al3    | C6     | 8.0879179653E+01 | 1.4232268708E-02 | 5.2889050885E-02 | 1.1837161076E-01          |
| Al4    | C6     | 8.0852838927E+01 | 1.4880161236E-02 | 5.5314499556E-02 | 1.2376021631E-01          |
| H5     | C6     | 5.1711835126E+00 | 9.0283809055E-01 | 4.8265751633E+01 | 7.5090206083E+00 (Bonded) |
| Al1    | C7     | 8.0785390271E+01 | 5.3537057193E-03 | 1.9901501641E-02 | 4.4567260055E-02          |
| Al2    | C7     | 8.0811224893E+01 | 5.6467862572E-03 | 2.0984230850E-02 | 4.7007027430E-02          |
| Al3    | C7     | 8.0812070298E+01 | 3.9810849720E-03 | 1.4794254520E-02 | 3.3140792295E-02          |
| Al4    | C7     | 8.0786007942E+01 | 4.1187074581E-03 | 1.5310603041E-02 | 3.4286439338E-02          |
| H5     | C7     | 5.5969181798E+00 | 4.1326303511E-02 | 2.2093054359E+00 | 3.4402341336E-01          |
| C6     | C7     | 3.5415571501E+01 | 1.3851417767E+00 | 1.1520402446E+01 | 1.1530699858E+01 (Bonded) |
| Al1    | C8     | 8.0786009252E+01 | 4.1187193548E-03 | 1.5310647297E-02 | 3.4286537741E-02          |
| Al2    | C8     | 8.0812059241E+01 | 3.9810665401E-03 | 1.4794188323E-02 | 3.3140638247E-02          |
| Al3    | C8     | 8.0811238906E+01 | 5.6468453947E-03 | 2.0984447354E-02 | 4.7007518859E-02          |
| Al4    | C8     | 8.0785391902E+01 | 5.3537621010E-03 | 1.9901711189E-02 | 4.4567728588E-02          |
| H5     | C8     | 5.5969182774E+00 | 4.1326315298E-02 | 2.2093060661E+00 | 3.4402350515E-01          |
| C6     | C8     | 3.5415572167E+01 | 1.3851417739E+00 | 1.1520402423E+01 | 1.1530699622E+01 (Bonded) |
| C7     | C8     | 3.6035813420E+01 | 8.0167014351E-02 | 6.6735535417E-01 | 6.6735534189E-01          |
| Al1    | H9     | 1.3370196860E+01 | 8.9328438494E-03 | 3.3206346380E-02 | 4.4917496487E-01          |
| Al2    | H9     | 1.3373383369E+01 | 1.1162317394E-02 | 4.1480699702E-02 | 5.6128077549E-01          |

|     |     |                   |                  |                  |                           |
|-----|-----|-------------------|------------------|------------------|---------------------------|
| A13 | H9  | 1.3375574260E+01  | 6.7846925957E-03 | 2.5212842682E-02 | 3.4115832647E-01          |
| A14 | H9  | 1.3371505177E+01  | 6.3162682129E-03 | 2.3479665961E-02 | 3.1760429270E-01          |
| H5  | H9  | 9.2685893365E-01  | 6.2909544522E-03 | 3.3631461533E-01 | 3.1633142734E-01          |
| C6  | H9  | 5.9540094724E+00  | 4.7564680446E-02 | 3.9560156958E-01 | 2.3917202661E+00          |
| C7  | H9  | 5.4944561473E+00  | 9.5599447939E-01 | 7.9582361841E+00 | 4.8070781705E+01 (Bonded) |
| C8  | H9  | 5.9673643059E+00  | 1.0178382127E-02 | 8.4730580762E-02 | 5.1180503221E-01          |
| A11 | H10 | 1.3371502789E+01  | 6.3162781162E-03 | 2.3479702824E-02 | 3.1760484657E-01          |
| A12 | H10 | 1.3375569840E+01  | 6.7846661650E-03 | 2.5212748379E-02 | 3.4115705749E-01          |
| A13 | H10 | 1.3373383083E+01  | 1.1162336862E-02 | 4.1480765606E-02 | 5.6128185323E-01          |
| A14 | H10 | 1.3370194550E+01  | 8.9328148534E-03 | 3.3206238522E-02 | 4.4917358589E-01          |
| H5  | H10 | 9.2685876727E-01  | 6.2909598763E-03 | 3.3631490530E-01 | 3.1633175575E-01          |
| C6  | H10 | 5.9540084377E+00  | 4.7564645699E-02 | 3.9560128059E-01 | 2.3917189398E+00          |
| C7  | H10 | 5.9673631462E+00  | 1.0178379357E-02 | 8.4730559270E-02 | 5.1180498304E-01          |
| C8  | H10 | 5.4944552464E+00  | 9.5599439907E-01 | 7.9582353690E+00 | 4.8070786127E+01 (Bonded) |
| H9  | H10 | 9.8790318637E-01  | 1.7019847932E-03 | 8.5581811634E-02 | 8.5581826696E-02          |
| A11 | C11 | 8.0995498849E+01  | 2.3676325091E-03 | 8.8012761137E-03 | 1.9658741846E-02          |
| A12 | C11 | 8.1021513572E+01  | 2.4346919379E-03 | 9.0476485822E-03 | 2.0215544472E-02          |
| A13 | C11 | 8.1021572383E+01  | 2.3422432580E-03 | 8.7040952784E-03 | 1.9447931794E-02          |
| A14 | C11 | 8.0995511638E+01  | 2.3423995367E-03 | 8.7074767591E-03 | 1.9449229395E-02          |
| H5  | C11 | 5.6277265662E+00  | 8.7216068451E-03 | 4.6625736579E-01 | 7.2416566671E-02          |
| C6  | C11 | 3.6163572480E+01  | 7.5620816551E-02 | 6.2894806482E-01 | 6.2788887423E-01          |
| C7  | C11 | 3.5473405916E+01  | 1.3912951561E+00 | 1.1581924051E+01 | 1.1552093578E+01 (Bonded) |
| C8  | C11 | 3.6117903308E+01  | 1.0230170459E-01 | 8.5161695982E-01 | 8.4942354571E-01          |
| H9  | C11 | 5.9631241468E+00  | 4.9503298121E-02 | 2.4892008154E+00 | 4.1103192937E-01          |
| H10 | C11 | 5.9851056017E+00  | 5.5382806237E-03 | 2.7848437567E-01 | 4.5985020324E-02          |
| A11 | C12 | 8.0995511579E+01  | 2.3424034764E-03 | 8.7074914226E-03 | 1.9449262078E-02          |
| A12 | C12 | 8.10215559918E+01 | 2.3422308267E-03 | 8.7040504339E-03 | 1.9447828547E-02          |
| A13 | C12 | 8.1021526265E+01  | 2.4347094051E-03 | 9.0477120873E-03 | 2.0215689475E-02          |
| A14 | C12 | 8.0995499139E+01  | 2.3676275926E-03 | 8.8012578184E-03 | 1.9658700995E-02          |
| H5  | C12 | 5.6277265733E+00  | 8.7216085931E-03 | 4.6625745923E-01 | 7.2416581081E-02          |
| C6  | C12 | 3.6163572530E+01  | 7.5620819298E-02 | 6.2894808767E-01 | 6.2788889615E-01          |
| C7  | C12 | 3.6117902694E+01  | 1.0230170375E-01 | 8.5161696855E-01 | 8.4942353756E-01          |
| C8  | C12 | 3.5473406625E+01  | 1.3912951727E+00 | 1.1581923977E+01 | 1.1552093700E+01 (Bonded) |
| H9  | C12 | 5.9851066626E+00  | 5.5382836200E-03 | 2.7848447733E-01 | 4.5985045137E-02          |
| H10 | C12 | 5.9631231089E+00  | 4.9503283362E-02 | 2.4892005114E+00 | 4.1103180624E-01          |
| C11 | C12 | 3.6224931209E+01  | 7.5040247565E-02 | 6.2306833904E-01 | 6.2306833815E-01          |
| A11 | H13 | 1.4060774118E+01  | 5.7947519241E-03 | 2.1541016816E-02 | 2.7710527443E-01          |
| A12 | H13 | 1.4065262482E+01  | 5.8636806863E-03 | 2.1790240245E-02 | 2.8040145066E-01          |
| A13 | H13 | 1.4065269167E+01  | 5.8546803112E-03 | 2.1756790239E-02 | 2.7997105236E-01          |
| A14 | H13 | 1.4060779427E+01  | 5.7841930029E-03 | 2.1501765755E-02 | 2.7660034638E-01          |
| H5  | H13 | 9.7697397466E-01  | 1.8809558801E-03 | 1.0055595825E-01 | 8.9947387250E-02          |
| C6  | H13 | 6.2801373543E+00  | 1.1211920628E-02 | 9.3250987011E-02 | 5.3615450380E-01          |
| C7  | H13 | 6.2541034974E+00  | 5.2052755165E-02 | 4.3331643494E-01 | 2.4891648847E+00          |
| C8  | H13 | 6.2767584357E+00  | 6.7431098664E-03 | 5.6133441250E-02 | 3.2245579009E-01          |
| H9  | H13 | 1.0363458485E+00  | 6.6902078254E-03 | 3.3640729823E-01 | 3.1992601232E-01          |
| H10 | H13 | 1.0393559126E+00  | 6.6971356319E-03 | 3.3675571210E-02 | 3.2025730031E-02          |
| C11 | H13 | 5.8105030302E+00  | 9.7168750674E-01 | 8.0680400257E+00 | 4.6466136384E+01 (Bonded) |
| C12 | H13 | 6.2908900255E+00  | 1.0913534009E-02 | 9.0616405448E-02 | 5.2188564344E-01          |
| A11 | H14 | 1.4060779503E+01  | 5.7842192183E-03 | 2.1501863252E-02 | 2.7660159768E-01          |
| A12 | H14 | 1.4065267112E+01  | 5.8546573224E-03 | 2.1756708189E-02 | 2.7996995067E-01          |
| A13 | H14 | 1.4065264774E+01  | 5.8637035661E-03 | 2.1790321884E-02 | 2.8040254241E-01          |
| A14 | H14 | 1.4060774279E+01  | 5.7947257434E-03 | 2.1540919448E-02 | 2.7710402014E-01          |
| H5  | H14 | 9.7697398304E-01  | 1.8809555916E-03 | 1.0055594283E-01 | 8.9947372698E-02          |
| C6  | H14 | 6.2801374064E+00  | 1.1211922178E-02 | 9.3250999905E-02 | 5.3615457342E-01          |
| C7  | H14 | 6.2767583731E+00  | 6.7431096104E-03 | 5.6133440152E-02 | 3.2245577513E-01          |
| C8  | H14 | 6.2541036637E+00  | 5.2052759723E-02 | 4.3331646491E-01 | 2.4891650817E+00          |
| H9  | H14 | 1.0393561041E+00  | 6.6971396477E-04 | 3.3675585476E-02 | 3.2025748965E-02          |
| H10 | H14 | 1.0363456744E+00  | 6.6902075053E-03 | 3.3640734135E-01 | 3.1992599432E-01          |
| C11 | H14 | 6.2908900696E+00  | 1.0913533941E-02 | 9.0616405018E-02 | 5.2188563583E-01          |
| C12 | H14 | 5.8105030864E+00  | 9.7168751833E-01 | 8.0680401104E+00 | 4.6466136547E+01 (Bonded) |
| H13 | H14 | 1.0922027595E+00  | 2.0976959538E-03 | 1.0031190646E-01 | 1.0031190561E-01          |
| A11 | C15 | 8.1087438389E+01  | 2.8642275680E-03 | 1.0647284822E-02 | 2.3754994086E-02          |
| A12 | C15 | 8.1113545117E+01  | 2.8065713439E-03 | 1.0429603370E-02 | 2.3276811668E-02          |
| A13 | C15 | 8.1113557711E+01  | 2.8065847968E-03 | 1.0429651743E-02 | 2.3276923242E-02          |
| A14 | C15 | 8.1087438565E+01  | 2.8642213232E-03 | 1.0647261585E-02 | 2.3754942293E-02          |
| H5  | C15 | 5.6362406838E+00  | 4.5138954577E-03 | 2.4131298773E-01 | 3.7436815810E-02          |

|     |     |                  |                  |                  |                           |
|-----|-----|------------------|------------------|------------------|---------------------------|
| C6  | C15 | 3.6190539392E+01 | 1.0409350834E-01 | 8.6575910735E-01 | 8.6331850957E-01          |
| C7  | C15 | 3.6173127508E+01 | 7.4184894834E-02 | 6.1755682393E-01 | 6.1526596479E-01          |
| C8  | C15 | 3.6173128189E+01 | 7.4184865877E-02 | 6.1755657150E-01 | 6.1526572464E-01          |
| H9  | C15 | 5.9896835554E+00 | 1.0014898835E-02 | 5.0358451445E-01 | 8.3060391311E-02          |
| H10 | C15 | 5.9896825142E+00 | 1.0014871236E-02 | 5.0358321528E-01 | 8.3060162410E-02          |
| C11 | C15 | 3.5608986549E+01 | 1.3894749921E+00 | 1.1536980534E+01 | 1.1523864440E+01 (Bonded) |
| C12 | C15 | 3.5608985826E+01 | 1.3894765422E+00 | 1.1536993389E+01 | 1.1523877296E+01 (Bonded) |
| H13 | C15 | 6.2768201449E+00 | 5.3385879009E-02 | 2.5529149215E+00 | 4.4276553102E-01          |
| H14 | C15 | 6.2768198464E+00 | 5.3386582021E-02 | 2.5529485181E+00 | 4.4277136158E-01          |
| Al1 | H16 | 1.4468059082E+01 | 1.6992608630E-02 | 6.3167167989E-02 | 7.8941154928E-01          |
| Al2 | H16 | 1.4472667142E+01 | 1.7087708141E-02 | 6.3500262984E-02 | 7.9382950856E-01          |
| Al3 | H16 | 1.4472669356E+01 | 1.7087780659E-02 | 6.3500522604E-02 | 7.9383287744E-01          |
| Al4 | H16 | 1.4468059152E+01 | 1.6992530396E-02 | 6.3166877033E-02 | 7.8940791483E-01          |
| H5  | H16 | 1.0057151063E+00 | 1.8182825695E-03 | 9.7205441171E-02 | 8.4470447799E-02          |
| C6  | H16 | 6.4662361643E+00 | 8.0903512665E-03 | 6.7288492837E-02 | 3.7584675001E-01          |
| C7  | H16 | 6.4589604665E+00 | 1.1085266992E-02 | 9.2280002433E-02 | 5.1497907007E-01          |
| C8  | H16 | 6.4589605637E+00 | 1.1085310713E-02 | 9.2280364695E-02 | 5.1498110119E-01          |
| H9  | H16 | 1.0690935489E+00 | 2.2416888937E-03 | 1.1272004157E-01 | 1.0414028482E-01          |
| H10 | H16 | 1.0690933567E+00 | 2.2416966274E-03 | 1.1272045029E-01 | 1.0414064410E-01          |
| C11 | H16 | 6.4545811124E+00 | 5.3229990230E-02 | 4.4197510904E-01 | 2.4728615818E+00          |
| C12 | H16 | 6.4545812887E+00 | 5.3229656184E-02 | 4.4197233479E-01 | 2.4728460634E+00          |
| H13 | H16 | 1.1216153111E+00 | 7.4643431915E-03 | 3.5694519724E-01 | 3.4676481119E-01 (Bonded) |
| H14 | H16 | 1.1216153661E+00 | 7.4642520665E-03 | 3.5694083664E-01 | 3.4676057788E-01 (Bonded) |
| C15 | H16 | 6.0014436064E+00 | 9.7425838311E-01 | 8.0801897123E+00 | 4.5260315021E+01 (Bonded) |

### Benzene-LiAl<sub>4</sub><sup>-</sup> CH-π

| Atom A | Atom B | 2*D2(A,B)        | DI(A,B)          | %Deloc(A,B)      | %Deloc(B,A)               |
|--------|--------|------------------|------------------|------------------|---------------------------|
| Al1    | Al2    | 1.8000929224E+02 | 1.0221816564E+00 | 3.8046822419E+00 | 3.8032207769E+00 (Bonded) |
| Al1    | Al3    | 1.8002852878E+02 | 1.0208342227E+00 | 3.7996669329E+00 | 3.7978168668E+00 (Bonded) |
| Al2    | Al3    | 1.8023544683E+02 | 7.4574964406E-01 | 2.7747030315E+00 | 2.7744177395E+00          |
| Al1    | Al4    | 1.8006600805E+02 | 7.4061254675E-01 | 2.7566483777E+00 | 2.7568733684E+00          |
| Al2    | Al4    | 1.7999590642E+02 | 1.0194884505E+00 | 3.7932001936E+00 | 3.7949675184E+00 (Bonded) |
| Al3    | Al4    | 1.8001311484E+02 | 1.0221942247E+00 | 3.8028764920E+00 | 3.8050395553E+00 (Bonded) |
| Al1    | C5     | 8.0731939536E+01 | 5.0950248901E-04 | 1.8964291328E-03 | 4.2388617623E-03          |
| Al2    | C5     | 8.0762961018E+01 | 5.1251495778E-04 | 1.9069091328E-03 | 4.2639243262E-03          |
| Al3    | C5     | 8.0771226131E+01 | 5.9197288843E-04 | 2.2023209747E-03 | 4.9249832832E-03          |
| Al4    | C5     | 8.0725344853E+01 | 5.2162389217E-04 | 1.9417049076E-03 | 4.3397071035E-03          |
| Al1    | C6     | 8.0640256672E+01 | 3.6205161238E-03 | 1.3475993545E-02 | 3.0154944650E-02          |
| Al2    | C6     | 8.0672005041E+01 | 2.1004885517E-03 | 7.8152661533E-03 | 1.7494775289E-02          |
| Al3    | C6     | 8.0679269778E+01 | 4.1621549701E-03 | 1.5484494931E-02 | 3.4666204612E-02          |
| Al4    | C6     | 8.0634343727E+01 | 2.2838724020E-03 | 8.5015397453E-03 | 1.9022162453E-02          |
| C5     | C6     | 3.5383440352E+01 | 1.3902093963E+00 | 1.1565999340E+01 | 1.1578925756E+01 (Bonded) |
| Al1    | C7     | 8.0773437080E+01 | 1.3007549172E-02 | 4.8415651989E-02 | 1.0815376582E-01          |
| Al2    | C7     | 8.0804870830E+01 | 1.2222721857E-02 | 4.5476955518E-02 | 1.0162816838E-01          |
| Al3    | C7     | 8.0813244540E+01 | 1.2094808110E-02 | 4.4996401195E-02 | 1.0056460496E-01          |
| Al4    | C7     | 8.0766810438E+01 | 1.3075796259E-02 | 4.8673648098E-02 | 1.0872121934E-01          |
| C5     | C7     | 3.6102704125E+01 | 7.5048990824E-02 | 6.2437829916E-01 | 6.2400924812E-01          |
| C6     | C7     | 3.5406321068E+01 | 1.3871230511E+00 | 1.1553219872E+01 | 1.1533501019E+01 (Bonded) |
| Al1    | C8     | 8.0642681158E+01 | 2.2483202750E-03 | 8.3685166633E-03 | 1.8725648402E-02          |
| Al2    | C8     | 8.0672727021E+01 | 4.1346416132E-03 | 1.5383718530E-02 | 3.4436306064E-02          |
| Al3    | C8     | 8.0682065369E+01 | 2.0494446179E-03 | 7.6245634835E-03 | 1.7069267115E-02          |
| Al4    | C8     | 8.0635426447E+01 | 3.5949273941E-03 | 1.3381841339E-02 | 2.9941173045E-02          |
| C5     | C8     | 3.6027744883E+01 | 1.0315581356E-01 | 8.5821608942E-01 | 8.5915672998E-01          |
| C6     | C8     | 3.6000471966E+01 | 7.7145581454E-02 | 6.4253842801E-01 | 6.4252457720E-01          |
| C7     | C8     | 3.5407149333E+01 | 1.3870229195E+00 | 1.1532668456E+01 | 1.1552136858E+01 (Bonded) |
| Al1    | C9     | 8.0730065464E+01 | 5.2208113705E-04 | 1.9432483635E-03 | 4.3436116942E-03          |
| Al2    | C9     | 8.0761054727E+01 | 5.8809691590E-04 | 2.1881261471E-03 | 4.8928499039E-03          |
| Al3    | C9     | 8.0763974444E+01 | 5.1196126764E-04 | 1.9046531691E-03 | 4.2594163844E-03          |
| Al4    | C9     | 8.0723483140E+01 | 5.0979078580E-04 | 1.8976570772E-03 | 4.2413584051E-03          |
| C5     | C9     | 3.6080835251E+01 | 7.4392699622E-02 | 6.1891821262E-01 | 6.1893253196E-01          |
| C6     | C9     | 3.6026170151E+01 | 1.0308040450E-01 | 8.5854717556E-01 | 8.5760855669E-01          |
| C7     | C9     | 3.6101913401E+01 | 7.4958192030E-02 | 6.2325428411E-01 | 6.2363731683E-01          |
| C8     | C9     | 3.5383360593E+01 | 1.3902549646E+00 | 1.1579055683E+01 | 1.1566646051E+01 (Bonded) |

|     |     |                  |                  |                  |                           |
|-----|-----|------------------|------------------|------------------|---------------------------|
| A11 | C10 | 8.0786504740E+01 | 5.0266320955E-04 | 1.8709725176E-03 | 4.1791372132E-03          |
| A12 | C10 | 8.0817602685E+01 | 3.9468313681E-04 | 1.4684934883E-03 | 3.2813919005E-03          |
| A13 | C10 | 8.0825917903E+01 | 3.8515600119E-04 | 1.4328986285E-03 | 3.2021833842E-03          |
| A14 | C10 | 8.0779910642E+01 | 5.0470913905E-04 | 1.8787410372E-03 | 4.1961470519E-03          |
| C5  | C10 | 3.5448487555E+01 | 1.3895802651E+00 | 1.1560765214E+01 | 1.1552957301E+01 (Bonded) |
| C6  | C10 | 3.6065826735E+01 | 7.4203043465E-02 | 6.1803030067E-01 | 6.1692340794E-01          |
| C7  | C10 | 3.6112848591E+01 | 1.0360984819E-01 | 8.6148398205E-01 | 8.6141130677E-01          |
| C8  | C10 | 3.6066582966E+01 | 7.4247111855E-02 | 6.1838401182E-01 | 6.1728979212E-01          |
| C9  | C10 | 3.5447624999E+01 | 1.3896329888E+00 | 1.1561471335E+01 | 1.1553395645E+01 (Bonded) |
| A11 | H11 | 1.3696173560E+01 | 1.7512073243E-04 | 6.5182028725E-04 | 8.5878655788E-03          |
| A12 | H11 | 1.3701427536E+01 | 1.9330346002E-04 | 7.1922219581E-04 | 9.4795408146E-03          |
| A13 | H11 | 1.3702837818E+01 | 1.9058048257E-04 | 7.0901793365E-04 | 9.3460068578E-03          |
| A14 | H11 | 1.3695053755E+01 | 1.7920426100E-04 | 6.6707410890E-04 | 8.7881205339E-03          |
| C5  | H11 | 5.6426432868E+00 | 9.6988476964E-01 | 8.0690625710E+00 | 4.7562843718E+01 (Bonded) |
| C6  | H11 | 6.0951428895E+00 | 5.1204204449E-02 | 4.2647509312E-01 | 2.5110380636E+00          |
| C7  | H11 | 6.1259490293E+00 | 1.0521228104E-02 | 8.7480771782E-02 | 5.1595771345E-01          |
| C8  | H11 | 6.1176738512E+00 | 6.4061688539E-03 | 5.3355238975E-02 | 3.1415650350E-01          |
| C9  | H11 | 6.1221728683E+00 | 1.0542076736E-02 | 8.7707991237E-02 | 5.1698012379E-01          |
| C10 | H11 | 6.1056858565E+00 | 5.2082125532E-02 | 4.3301030356E-01 | 2.5540910371E+00          |
| A11 | H12 | 1.3351650210E+01 | 4.9024362259E-03 | 1.8247453312E-02 | 2.4657383088E-01          |
| A12 | H12 | 1.3357687607E+01 | 3.0908132806E-03 | 1.1499957188E-02 | 1.5545611121E-01          |
| A13 | H12 | 1.3356772572E+01 | 7.6683300809E-03 | 2.8528543296E-02 | 3.8568773511E-01          |
| A14 | H12 | 1.3351692610E+01 | 2.6379590228E-03 | 9.8196000175E-03 | 1.3267927047E-01          |
| C5  | H12 | 5.9497520315E+00 | 4.9508861234E-02 | 4.1189439366E-01 | 2.4901067581E+00          |
| C6  | H12 | 5.4881095530E+00 | 9.5945424590E-01 | 7.9912058642E+00 | 4.8256886590E+01 (Bonded) |
| C7  | H12 | 5.9538657961E+00 | 4.8348207565E-02 | 4.0200045756E-01 | 2.4317303084E+00          |
| C8  | H12 | 5.9629176848E+00 | 1.0095277773E-02 | 8.4080824344E-02 | 5.0775394104E-01          |
| C9  | H12 | 5.9715300525E+00 | 5.6763725214E-03 | 4.7226295521E-02 | 2.8549987264E-01          |
| C10 | H12 | 5.9735434292E+00 | 1.0001647981E-02 | 8.3153607578E-02 | 5.0304471984E-01          |
| H11 | H12 | 1.0102994426E+00 | 6.5577229383E-03 | 3.2158866808E-01 | 3.2982843473E-01          |
| A11 | H13 | 1.2915617735E+01 | 2.9424172864E-02 | 1.0952028661E-01 | 1.5284258030E+00          |
| A12 | H13 | 1.2920450629E+01 | 2.9695869305E-02 | 1.1048911554E-01 | 1.5425389559E+00 (Bonded) |
| A13 | H13 | 1.2922246866E+01 | 2.8763654595E-02 | 1.0700963010E-01 | 1.4941154701E+00          |
| A14 | H13 | 1.2914617628E+01 | 2.9313875993E-02 | 1.0911865375E-01 | 1.5226964802E+00          |
| C5  | H13 | 5.7804754263E+00 | 8.8787590877E-03 | 7.3867808707E-02 | 4.6120326137E-01          |
| C6  | H13 | 5.7567096732E+00 | 4.3494003485E-02 | 3.6225754088E-01 | 2.2592770070E+00          |
| C7  | H13 | 5.3303666956E+00 | 9.1593883961E-01 | 7.6157493972E+00 | 4.7578042818E+01 (Bonded) |
| C8  | H13 | 5.7568247998E+00 | 4.3512880866E-02 | 3.6240695649E-01 | 2.2602575843E+00          |
| C9  | H13 | 5.7803464863E+00 | 8.8689649963E-03 | 7.3788032816E-02 | 4.6069451157E-01          |
| C10 | H13 | 5.7864137220E+00 | 4.8214838922E-03 | 4.0085771892E-02 | 2.5044987410E-01          |
| H11 | H13 | 9.8059553643E-01 | 1.6368780023E-03 | 8.0271981835E-02 | 8.5026912622E-02          |
| H12 | H13 | 9.5375638109E-01 | 6.2798643070E-03 | 3.1585320609E-01 | 3.2620480754E-01          |
| A11 | H14 | 1.3357710772E+01 | 2.5739323886E-03 | 9.5804838501E-03 | 1.2941152613E-01          |
| A12 | H14 | 1.3360327879E+01 | 7.6066524105E-03 | 2.8301993398E-02 | 3.8244535930E-01          |
| A13 | H14 | 1.3363975352E+01 | 3.0601592017E-03 | 1.1384732185E-02 | 1.5385791571E-01          |
| A14 | H14 | 1.3355526757E+01 | 4.7614844695E-03 | 1.7724260527E-02 | 2.3939672019E-01          |
| C5  | H14 | 5.9738510621E+00 | 5.6919311302E-03 | 4.7354644466E-02 | 2.8617748369E-01          |
| C6  | H14 | 5.9649749456E+00 | 1.0099700749E-02 | 8.4119475415E-02 | 5.0779021746E-01          |
| C7  | H14 | 5.9560382307E+00 | 4.8387060348E-02 | 4.0232350648E-01 | 2.4327924665E+00          |
| C8  | H14 | 5.4903172431E+00 | 9.5967249553E-01 | 7.9928513445E+00 | 4.8250172684E+01 (Bonded) |
| C9  | H14 | 5.9517775692E+00 | 4.9562368718E-02 | 4.1234909496E-01 | 2.4918843256E+00          |
| C10 | H14 | 5.9757298589E+00 | 1.0012880667E-02 | 8.3246996028E-02 | 5.0342509921E-01          |
| H11 | H14 | 1.0137218275E+00 | 4.5621443111E-04 | 2.2372612054E-02 | 2.2937434578E-02          |
| H12 | H14 | 9.8776627808E-01 | 1.7063637019E-03 | 8.5823581474E-02 | 8.5792125608E-02          |
| H13 | H14 | 9.5410546280E-01 | 6.2833970306E-03 | 3.2638831332E-01 | 3.1591505767E-01          |
| A11 | H15 | 1.3696244426E+01 | 1.7784440645E-04 | 6.6195812731E-04 | 8.7213877022E-03          |
| A12 | H15 | 1.3701502912E+01 | 1.8706206146E-04 | 6.9599988836E-04 | 9.1734162179E-03          |
| A13 | H15 | 1.3702909044E+01 | 1.9265371783E-04 | 7.1673100563E-04 | 9.4476278398E-03          |
| A14 | H15 | 1.3695128758E+01 | 1.7364266315E-04 | 6.4637148770E-04 | 8.5153366205E-03          |
| C5  | H15 | 6.1223440591E+00 | 1.0547853187E-02 | 8.7754019881E-02 | 5.1726067133E-01          |
| C6  | H15 | 6.1175762892E+00 | 6.4019609483E-03 | 5.3321341889E-02 | 3.1394849352E-01          |
| C7  | H15 | 6.1259837559E+00 | 1.0516441079E-02 | 8.7440969141E-02 | 5.1572023957E-01          |
| C8  | H15 | 6.0952985806E+00 | 5.1221267366E-02 | 4.2660801226E-01 | 2.5118615773E+00          |
| C9  | H15 | 5.6425289047E+00 | 9.6989463041E-01 | 8.0693312971E+00 | 4.7563076462E+01 (Bonded) |
| C10 | H15 | 6.1057230773E+00 | 5.2072355694E-02 | 4.3292907721E-01 | 2.5535984608E+00          |
| H11 | H15 | 1.0385642546E+00 | 1.9790072611E-03 | 9.7049892960E-02 | 9.7049381167E-02          |

|     |      |                  |                  |                  |                           |
|-----|------|------------------|------------------|------------------|---------------------------|
| H12 | H15  | 1.0133553610E+00 | 4.5657638681E-04 | 2.2964049627E-02 | 2.2390244172E-02          |
| H13 | H15  | 9.8060273686E-01 | 1.6328281778E-03 | 8.4816546254E-02 | 8.0072957446E-02          |
| H14 | H15  | 1.0106725252E+00 | 6.5655132301E-03 | 3.3009922509E-01 | 3.2196900362E-01          |
| Al1 | H16  | 1.3752145124E+01 | 7.7022485791E-05 | 2.8668689375E-04 | 3.7617988398E-03          |
| Al2 | H16  | 1.3757428405E+01 | 7.9573443507E-05 | 2.9606809294E-04 | 3.8863882980E-03          |
| Al3 | H16  | 1.3758843854E+01 | 7.8022513138E-05 | 2.9026771418E-04 | 3.8106404433E-03          |
| Al4 | H16  | 1.3751022874E+01 | 7.6868195300E-05 | 2.8613595790E-04 | 3.7542632509E-03          |
| C5  | H16  | 6.1266012544E+00 | 5.2007307934E-02 | 4.3268049464E-01 | 2.5400508519E+00          |
| C6  | H16  | 6.1404629428E+00 | 1.0546709529E-02 | 8.7842570289E-02 | 5.1510411877E-01          |
| C7  | H16  | 6.1529522669E+00 | 6.5828199615E-03 | 5.4734120867E-02 | 3.2150669041E-01          |
| C8  | H16  | 6.1405918147E+00 | 1.0553931054E-02 | 8.7900822837E-02 | 5.1545681998E-01          |
| C9  | H16  | 6.1264765474E+00 | 5.1972034264E-02 | 4.3239703521E-01 | 2.5383280764E+00          |
| C10 | H16  | 5.6711662267E+00 | 9.7119367647E-01 | 8.0744951241E+00 | 4.7433359335E+01 (Bonded) |
| H11 | H16  | 1.0403422645E+00 | 6.9010776658E-03 | 3.3842667581E-01 | 3.3705048194E-01          |
| H12 | H16  | 1.0167586070E+00 | 1.9163752589E-03 | 9.6386361235E-02 | 9.3596281029E-02          |
| H13 | H16  | 9.8523093094E-01 | 3.8041301064E-04 | 1.9760387622E-02 | 1.8579473349E-02          |
| H14 | H16  | 1.0171286530E+00 | 1.9225794486E-03 | 9.6662966615E-02 | 9.3899295317E-02          |
| H15 | H16  | 1.0403532528E+00 | 6.8901101276E-03 | 3.3788704933E-01 | 3.3651482444E-01          |
| Al1 | Li17 | 2.9318544821E+01 | 9.1487773804E-02 | 3.4052842386E-01 | 2.0926339887E+00          |
| Al2 | Li17 | 2.9329562287E+01 | 9.2020492822E-02 | 3.4237970132E-01 | 2.1048190696E+00          |
| Al3 | Li17 | 2.9323330879E+01 | 9.2524660182E-02 | 3.4422015564E-01 | 2.1163510778E+00 (Bonded) |
| Al4 | Li17 | 2.9316247927E+01 | 9.1288672716E-02 | 3.3981507841E-01 | 2.0880798752E+00          |
| C5  | Li17 | 1.3137291911E+01 | 6.0500188023E-05 | 5.0333794075E-04 | 1.3838433762E-03          |
| C6  | Li17 | 1.3122515943E+01 | 2.8009526872E-04 | 2.3328876426E-03 | 6.4067235984E-03          |
| C7  | Li17 | 1.3143888927E+01 | 2.4057976504E-03 | 2.0003466622E-02 | 5.5028707378E-02          |
| C8  | Li17 | 1.3122801328E+01 | 2.7509154438E-04 | 2.2911626941E-03 | 6.2922715444E-03          |
| C9  | Li17 | 1.3136987550E+01 | 6.1343963677E-05 | 5.1036963239E-04 | 1.4031433716E-03          |
| C10 | Li17 | 1.3146191121E+01 | 1.9451709323E-05 | 1.6172132901E-04 | 4.4492620573E-04          |
| H11 | Li17 | 2.2287299147E+00 | 4.8016997350E-05 | 2.3547384311E-03 | 1.0983106979E-03          |
| H12 | Li17 | 2.1728611556E+00 | 4.2817290692E-04 | 2.1535462997E-02 | 9.7937586718E-03          |
| H13 | Li17 | 2.1021691932E+00 | 3.8937818816E-03 | 2.0226079851E-01 | 8.9063925935E-02          |
| H14 | Li17 | 2.1736656279E+00 | 4.1275356029E-04 | 2.0752319831E-02 | 9.4410662028E-03          |
| H15 | Li17 | 2.2287417883E+00 | 4.7776488084E-05 | 2.3429315769E-03 | 1.0928094397E-03          |
| H16 | Li17 | 2.2378500567E+00 | 7.9589541937E-06 | 3.8871745496E-04 | 1.8204812914E-04          |

### Benzene-LiAl<sub>4</sub><sup>-</sup> π-π

| Atom A | Atom B | *2D2(A,B)        | DI(A,B)          | %Deloc(A,B)      | %Deloc(B,A)               |
|--------|--------|------------------|------------------|------------------|---------------------------|
| Al1    | Al2    | 1.7965860601E+02 | 9.9947561338E-01 | 3.7233349909E+00 | 3.7230418690E+00 (Bonded) |
| Al1    | Al3    | 1.7965837792E+02 | 9.9940819018E-01 | 3.7230838200E+00 | 3.7227961279E+00 (Bonded) |
| Al2    | Al3    | 1.7981433052E+02 | 7.1587131722E-01 | 2.6666172252E+00 | 2.6666211004E+00          |
| Al1    | Al4    | 1.7978624066E+02 | 7.1579622577E-01 | 2.6665474355E+00 | 2.6665477607E+00          |
| Al2    | Al4    | 1.7965861224E+02 | 9.9941922039E-01 | 3.7228318054E+00 | 3.7231253647E+00 (Bonded) |
| Al3    | Al4    | 1.7965832790E+02 | 9.9946427701E-01 | 3.7230050514E+00 | 3.7232932137E+00 (Bonded) |
| Al1    | C5     | 8.0660889381E+01 | 1.8508970903E-02 | 6.8951256124E-02 | 1.5397476156E-01          |
| Al2    | C5     | 8.0668530383E+01 | 1.5929578302E-02 | 5.9337602821E-02 | 1.3251698507E-01          |
| Al3    | C5     | 8.0656184699E+01 | 4.0386466634E-02 | 1.5043961325E-01 | 3.3597203230E-01 (Bonded) |
| Al4    | C5     | 8.0663738673E+01 | 1.2790709607E-02 | 4.7649088990E-02 | 1.0640496828E-01          |
| Al1    | C6     | 8.0654882732E+01 | 4.1919387812E-02 | 1.5616181260E-01 | 3.4869965811E-01 (Bonded) |
| Al2    | C6     | 8.0675801139E+01 | 1.2786084930E-02 | 4.7628105078E-02 | 1.0635898271E-01          |
| Al3    | C6     | 8.0673500027E+01 | 1.7153811673E-02 | 6.3897959115E-02 | 1.4269121229E-01          |
| Al4    | C6     | 8.0667827269E+01 | 1.6010637539E-02 | 5.9644250892E-02 | 1.3318190287E-01          |
| C5     | C6     | 3.5439372090E+01 | 1.3759632528E+00 | 1.1446536648E+01 | 1.1445728119E+01 (Bonded) |
| Al1    | C7     | 8.0635713157E+01 | 2.9743093924E-02 | 1.1080160522E-01 | 2.4749060723E-01          |
| Al2    | C7     | 8.0641401813E+01 | 3.1065314900E-02 | 1.1571814909E-01 | 2.5849273340E-01          |
| Al3    | C7     | 8.0649452536E+01 | 1.4729445896E-02 | 5.4867195093E-02 | 1.2256288866E-01          |
| Al4    | C7     | 8.0643364840E+01 | 1.4420056761E-02 | 5.3718877919E-02 | 1.1998847912E-01          |
| C5     | C7     | 3.6079996793E+01 | 7.2092583937E-02 | 5.9973287980E-01 | 5.9987832540E-01          |
| C6     | C7     | 3.5431683401E+01 | 1.3738218628E+00 | 1.1427915313E+01 | 1.1431494246E+01 (Bonded) |
| Al1    | C8     | 8.0663743107E+01 | 1.2790378929E-02 | 4.7647851308E-02 | 1.0640222474E-01          |
| Al2    | C8     | 8.0656297181E+01 | 4.0384841378E-02 | 1.5043334055E-01 | 3.3595853511E-01 (Bonded) |
| Al3    | C8     | 8.0668407529E+01 | 1.5929666502E-02 | 5.9338017595E-02 | 1.3251772795E-01          |
| Al4    | C8     | 8.0660874019E+01 | 1.8508879135E-02 | 6.8950922672E-02 | 1.5397400878E-01          |
| C5     | C8     | 3.6076978562E+01 | 9.5641588506E-02 | 7.9563530909E-01 | 7.9563536402E-01          |

|     |     |                  |                  |                  |                           |
|-----|-----|------------------|------------------|------------------|---------------------------|
| C6  | C8  | 3.6091198434E+01 | 7.2305575053E-02 | 6.0146224971E-01 | 6.0150477869E-01          |
| C7  | C8  | 3.5429191344E+01 | 1.3736984954E+00 | 1.1430467713E+01 | 1.1427697088E+01 (Bonded) |
| Al1 | C9  | 8.0667867871E+01 | 1.6010532672E-02 | 5.9643852958E-02 | 1.3318097985E-01          |
| Al2 | C9  | 8.0673648729E+01 | 1.7152333782E-02 | 6.3892361122E-02 | 1.4267886438E-01          |
| Al3 | C9  | 8.0675714125E+01 | 1.2787044061E-02 | 4.7631747052E-02 | 1.0636692059E-01          |
| Al4 | C9  | 8.0654903632E+01 | 4.1919334471E-02 | 1.5616163293E-01 | 3.4869908165E-01 (Bonded) |
| C5  | C9  | 3.6091214478E+01 | 7.2305982155E-02 | 6.0150812382E-01 | 6.0146540716E-01          |
| C6  | C9  | 3.6081957982E+01 | 9.5923066757E-02 | 7.9792054055E-01 | 7.9792023680E-01          |
| C7  | C9  | 3.6082538024E+01 | 7.2140116318E-02 | 6.0027383966E-01 | 6.0008567950E-01          |
| C8  | C9  | 3.5439383213E+01 | 1.3759635235E+00 | 1.1446539690E+01 | 1.1445726014E+01 (Bonded) |
| Al1 | C10 | 8.0643385748E+01 | 1.4419999894E-02 | 5.3718659520E-02 | 1.1998798950E-01          |
| Al2 | C10 | 8.0649580898E+01 | 1.4729235001E-02 | 5.4866329777E-02 | 1.2256111703E-01          |
| Al3 | C10 | 8.0641294651E+01 | 3.1067304817E-02 | 1.1572572970E-01 | 2.5850925599E-01          |
| Al4 | C10 | 8.0635714035E+01 | 2.9743753897E-02 | 1.1080407732E-01 | 2.4749606493E-01          |
| C5  | C10 | 3.5429198780E+01 | 1.3736985010E+00 | 1.1427696346E+01 | 1.1430466195E+01 (Bonded) |
| C6  | C10 | 3.6082529254E+01 | 7.2140047788E-02 | 6.0008533788E-01 | 6.0027318723E-01          |
| C7  | C10 | 3.6060217199E+01 | 9.4148379109E-02 | 7.8340335322E-01 | 7.8340324595E-01          |
| C8  | C10 | 3.6079999235E+01 | 7.2092603776E-02 | 5.9973308626E-01 | 5.9987840834E-01          |
| C9  | C10 | 3.5431701655E+01 | 1.3738227441E+00 | 1.1427918293E+01 | 1.1431500014E+01 (Bonded) |
| Al1 | H11 | 1.3533359620E+01 | 3.1446157626E-03 | 1.1714600882E-02 | 1.5591633231E-01          |
| Al2 | H11 | 1.3534013375E+01 | 3.9683643551E-03 | 1.4782138201E-02 | 1.9675943334E-01          |
| Al3 | H11 | 1.3529782051E+01 | 1.2391671582E-02 | 4.6158984324E-02 | 6.1440383503E-01          |
| Al4 | H11 | 1.3533893087E+01 | 2.0743815390E-03 | 7.7276705974E-03 | 1.0285198122E-01          |
| C5  | H11 | 5.5797539450E+00 | 9.6261587290E-01 | 8.0079303317E+00 | 4.7728418241E+01 (Bonded) |
| C6  | H11 | 6.0367220754E+00 | 4.9535922151E-02 | 4.1205656903E-01 | 2.4560899908E+00          |
| C7  | H11 | 6.0545128022E+00 | 1.0159046588E-02 | 8.4532853754E-02 | 5.0370582713E-01          |
| C8  | H11 | 6.0582551108E+00 | 5.6127042779E-03 | 4.6691675463E-02 | 2.7828909203E-01          |
| C9  | H11 | 6.0564194113E+00 | 1.0145865277E-02 | 8.4396709763E-02 | 5.0305227144E-01          |
| C10 | H11 | 6.0349185710E+00 | 4.9349168583E-02 | 4.1063159259E-01 | 2.4468303757E+00          |
| Al1 | H12 | 1.3531061557E+01 | 1.3028138885E-02 | 4.8533575733E-02 | 6.4583500838E-01          |
| Al2 | H12 | 1.3537624352E+01 | 2.0342244997E-03 | 7.5774765107E-03 | 1.0084121826E-01          |
| Al3 | H12 | 1.3537201199E+01 | 2.8411812417E-03 | 1.0583401887E-02 | 1.4084393230E-01          |
| Al4 | H12 | 1.3535535934E+01 | 4.0760840668E-03 | 1.5184590879E-02 | 2.0206092449E-01          |
| C5  | H12 | 6.0374915681E+00 | 4.9508369757E-02 | 4.1185647049E-01 | 2.4542445149E+00          |
| C6  | H12 | 5.5814345715E+00 | 9.6247884033E-01 | 8.0062248060E+00 | 4.7712304529E+01 (Bonded) |
| C7  | H12 | 6.0360900556E+00 | 4.9371708907E-02 | 4.1081920558E-01 | 2.4474699202E+00          |
| C8  | H12 | 6.0571718748E+00 | 1.0146919217E-02 | 8.4411477176E-02 | 5.0300627862E-01          |
| C9  | H12 | 6.0598591290E+00 | 5.6343411158E-03 | 4.6868338861E-02 | 2.7930733422E-01          |
| C10 | H12 | 6.0556964571E+00 | 1.0160565630E-02 | 8.4545482043E-02 | 5.0368276290E-01          |
| H11 | H12 | 1.0138074599E+00 | 6.6465718716E-03 | 3.2955031295E-01 | 3.2948595639E-01          |
| Al1 | H13 | 1.3518851701E+01 | 6.9863931523E-03 | 2.6026329943E-02 | 3.4672177055E-01          |
| Al2 | H13 | 1.3519588154E+01 | 7.6427632433E-03 | 2.8469256447E-02 | 3.7929620419E-01          |
| Al3 | H13 | 1.3521810668E+01 | 3.1584315107E-03 | 1.1765159335E-02 | 1.5674711424E-01          |
| Al4 | H13 | 1.3520838058E+01 | 3.0103800573E-03 | 1.1214535522E-02 | 1.4939959443E-01          |
| C5  | H13 | 6.0503488451E+00 | 1.0152906085E-02 | 8.4461275659E-02 | 5.0386995083E-01          |
| C6  | H13 | 6.0311740526E+00 | 4.9358004861E-02 | 4.1057659279E-01 | 2.4495464917E+00          |
| C7  | H13 | 5.5724980600E+00 | 9.6291809764E-01 | 8.0123871883E+00 | 4.7787844233E+01 (Bonded) |
| C8  | H13 | 6.0307716964E+00 | 4.9306367327E-02 | 4.1017605552E-01 | 2.4469838165E+00          |
| C9  | H13 | 6.0507786543E+00 | 1.0153412136E-02 | 8.4459487062E-02 | 5.0389506518E-01          |
| C10 | H13 | 6.0512229358E+00 | 5.4700039994E-03 | 4.5515588575E-02 | 2.7146618151E-01          |
| H11 | H13 | 1.0150538901E+00 | 1.8650236016E-03 | 9.2471596399E-02 | 9.2557671915E-02          |
| H12 | H13 | 1.0128696417E+00 | 6.6304137235E-03 | 3.2868495958E-01 | 3.2905516990E-01          |
| Al1 | H14 | 1.3533948649E+01 | 2.0744750605E-03 | 7.7280180499E-03 | 1.0285620816E-01          |
| Al2 | H14 | 1.3529855496E+01 | 1.2392047779E-02 | 4.6160318578E-02 | 6.1442003820E-01          |
| Al3 | H14 | 1.3534047601E+01 | 3.9684968068E-03 | 1.4782653065E-02 | 1.9676521613E-01          |
| Al4 | H14 | 1.3533411856E+01 | 3.1447583457E-03 | 1.1715133474E-02 | 1.5592278026E-01          |
| C5  | H14 | 6.0582796529E+00 | 5.6127829982E-03 | 4.6692327108E-02 | 2.7829188570E-01          |
| C6  | H14 | 6.0564412416E+00 | 1.0145918960E-02 | 8.4397188438E-02 | 5.0305292764E-01          |
| C7  | H14 | 6.0349418364E+00 | 4.9349292544E-02 | 4.1063268029E-01 | 2.4468267675E+00          |
| C8  | H14 | 5.5797761976E+00 | 9.6261885661E-01 | 8.0079557058E+00 | 4.7728375906E+01 (Bonded) |
| C9  | H14 | 6.0367478957E+00 | 4.9537225819E-02 | 4.1206725652E-01 | 2.4561448376E+00          |
| C10 | H14 | 6.0545377428E+00 | 1.0159139165E-02 | 8.4533612513E-02 | 5.0370840924E-01          |
| H11 | H14 | 1.0167298624E+00 | 4.1261234487E-04 | 2.0458144440E-02 | 2.0458062882E-02          |
| H12 | H14 | 1.0161965577E+00 | 1.8764859558E-03 | 9.3021753431E-02 | 9.3039551912E-02          |
| H13 | H14 | 1.0126826314E+00 | 6.6156415696E-03 | 3.2832205522E-01 | 3.2801541911E-01          |
| Al1 | H15 | 1.3535549074E+01 | 4.0760505893E-03 | 1.5184464314E-02 | 2.0205909369E-01          |

|     |      |                  |                  |                  |                           |
|-----|------|------------------|------------------|------------------|---------------------------|
| Al2 | H15  | 1.3537232369E+01 | 2.8411383809E-03 | 1.0583226850E-02 | 1.4084168823E-01          |
| Al3 | H15  | 1.3537616164E+01 | 2.0341997632E-03 | 7.5773953790E-03 | 1.0083990656E-01          |
| Al4 | H15  | 1.3531071382E+01 | 1.3028132899E-02 | 4.8533559354E-02 | 6.4583416433E-01          |
| C5  | H15  | 6.0571774051E+00 | 1.0146971101E-02 | 8.4411902968E-02 | 5.0300842435E-01          |
| C6  | H15  | 6.0598619441E+00 | 5.6343711333E-03 | 4.6868606398E-02 | 2.7930858555E-01          |
| C7  | H15  | 6.0557007789E+00 | 1.0160535207E-02 | 8.4545240473E-02 | 5.0368082791E-01          |
| C8  | H15  | 6.0374965176E+00 | 4.9507909044E-02 | 4.1185266629E-01 | 2.4542195964E+00          |
| C9  | H15  | 5.5814410644E+00 | 9.6248074635E-01 | 8.0062376131E+00 | 4.7712358579E+01 (Bonded) |
| C10 | H15  | 6.0360957545E+00 | 4.9372243641E-02 | 4.1082359882E-01 | 2.4474943539E+00          |
| H11 | H15  | 1.0161933764E+00 | 1.8764628663E-03 | 9.3038777997E-02 | 9.3020529995E-02          |
| H12 | H15  | 1.0171234033E+00 | 4.1374975610E-04 | 2.0510533359E-02 | 2.0510515976E-02          |
| H13 | H15  | 1.0152516521E+00 | 1.8681152058E-03 | 9.2711102512E-02 | 9.2606717487E-02          |
| H14 | H15  | 1.0138123250E+00 | 6.6466755068E-03 | 3.2955413759E-01 | 3.2949081459E-01          |
| Al1 | H16  | 1.3520869919E+01 | 3.0104082145E-03 | 1.1214639048E-02 | 1.4940065787E-01          |
| Al2 | H16  | 1.3521860513E+01 | 3.1585034543E-03 | 1.1765410227E-02 | 1.5675033429E-01          |
| Al3 | H16  | 1.3519598820E+01 | 7.6425840793E-03 | 2.8468630433E-02 | 3.7928646481E-01          |
| Al4 | H16  | 1.3518880231E+01 | 6.9864858790E-03 | 2.6026678551E-02 | 3.4672559739E-01          |
| C5  | H16  | 6.0307857164E+00 | 4.9306234372E-02 | 4.1017492115E-01 | 2.4469717485E+00          |
| C6  | H16  | 6.0507898752E+00 | 1.0153432300E-02 | 8.4459686944E-02 | 5.0389493955E-01          |
| C7  | H16  | 6.0512356093E+00 | 5.4700632919E-02 | 4.5516088177E-02 | 2.7146851729E-01          |
| C8  | H16  | 6.0503619204E+00 | 1.0152990032E-02 | 8.4461979835E-02 | 5.0387299065E-01          |
| C9  | H16  | 6.0311894745E+00 | 4.9358844356E-02 | 4.1058341970E-01 | 2.4495826789E+00          |
| C10 | H16  | 5.5725114800E+00 | 9.6291997978E-01 | 8.0124017523E+00 | 4.7787830822E+01 (Bonded) |
| H11 | H16  | 1.0126808440E+00 | 6.6156576603E-03 | 3.2801752458E-01 | 3.2832211989E-01          |
| H12 | H16  | 1.0152530611E+00 | 1.8681177444E-03 | 9.2606921817E-02 | 9.2711021268E-02          |
| H13 | H16  | 1.0148412281E+00 | 4.0521916563E-04 | 2.0110277722E-02 | 2.0110232771E-02          |
| H14 | H16  | 1.0150602116E+00 | 1.8650231605E-03 | 9.2471205886E-02 | 9.2557443137E-02          |
| H15 | H16  | 1.0128725188E+00 | 6.6309248188E-03 | 3.2871001718E-01 | 3.2907979903E-01          |
| Al1 | Li17 | 2.9450152229E+01 | 9.5662357170E-02 | 3.5636987736E-01 | 2.1763505519E+00          |
| Al2 | Li17 | 2.9452431799E+01 | 9.5748077104E-02 | 3.5666112826E-01 | 2.1783007090E+00          |
| Al3 | Li17 | 2.9452389434E+01 | 9.5747067068E-02 | 3.5665788418E-01 | 2.1782777304E+00          |
| Al4 | Li17 | 2.9450148608E+01 | 9.5662404879E-02 | 3.5637009854E-01 | 2.1763516373E+00 (Bonded) |
| C5  | Li17 | 1.3208595748E+01 | 1.7227276797E-03 | 1.4331244298E-02 | 3.9192629655E-02          |
| C6  | Li17 | 1.3209529248E+01 | 1.7219671918E-03 | 1.4323906011E-02 | 3.9175328302E-02          |
| C7  | Li17 | 1.3205399102E+01 | 1.7105286721E-03 | 1.4233212618E-02 | 3.8915098161E-02          |
| C8  | Li17 | 1.3208594868E+01 | 1.7226638565E-03 | 1.4330714347E-02 | 3.9191177657E-02          |
| C9  | Li17 | 1.3209534269E+01 | 1.7219816806E-03 | 1.4324021080E-02 | 3.9175657926E-02          |
| C10 | Li17 | 1.3205400921E+01 | 1.7105075998E-03 | 1.4233035328E-02 | 3.8914618759E-02          |
| H11 | Li17 | 2.2161988487E+00 | 1.9890516224E-04 | 9.8621153476E-03 | 4.5251588236E-03          |
| H12 | Li17 | 2.2166314503E+00 | 1.9949491781E-04 | 9.8894249637E-03 | 4.5385759596E-03          |
| H13 | Li17 | 2.2141429081E+00 | 1.8862093238E-04 | 9.3609080126E-03 | 4.2911891620E-03          |
| H14 | Li17 | 2.2162076807E+00 | 1.9891207905E-04 | 9.8624189790E-03 | 4.5253161831E-03          |
| H15 | Li17 | 2.2166333290E+00 | 1.9949489835E-04 | 9.8894156180E-03 | 4.5385755169E-03          |
| H16 | Li17 | 2.2141478562E+00 | 1.8862333701E-04 | 9.3610064257E-03 | 4.2912438681E-03          |

### Benzene- $\text{NaAl}_4^-$ CH- $\pi$

| Atom A | Atom B | 2*D2(A,B)        | DI(A,B)          | %Deloc(A,B)      | %Deloc(B,A)               |
|--------|--------|------------------|------------------|------------------|---------------------------|
| Al1    | Al2    | 1.7882322313E+02 | 9.7845070927E-01 | 3.6541838008E+00 | 3.6527259048E+00 (Bonded) |
| Al1    | Al3    | 1.7882207642E+02 | 9.8081370214E-01 | 3.6630087832E+00 | 3.6615466560E+00 (Bonded) |
| Al2    | Al3    | 1.7903203266E+02 | 7.0403759045E-01 | 2.6282942209E+00 | 2.6282937110E+00          |
| Al1    | Al4    | 1.7889087699E+02 | 7.0004761189E-01 | 2.6144420142E+00 | 2.6144421320E+00          |
| Al2    | Al4    | 1.7882203432E+02 | 9.8081217279E-01 | 3.6615416570E+00 | 3.6630032365E+00 (Bonded) |
| Al3    | Al4    | 1.7882324917E+02 | 9.7845205350E-01 | 3.6527302144E+00 | 3.6541889856E+00 (Bonded) |
| Al1    | H5     | 1.2895886231E+01 | 2.8404099616E-02 | 1.0607974394E-01 | 1.4727885126E+00          |
| Al2    | H5     | 1.2901153291E+01 | 2.8175469730E-02 | 1.0518390675E-01 | 1.4609337636E+00 (Bonded) |
| Al3    | H5     | 1.2901155853E+01 | 2.8175356472E-02 | 1.0518346353E-01 | 1.4609278911E+00          |
| Al4    | H5     | 1.2895885729E+01 | 2.8403939551E-02 | 1.0607915093E-01 | 1.4727802130E+00          |
| Al1    | C6     | 8.0497772134E+01 | 1.2731388826E-02 | 4.7547448602E-02 | 1.0586347648E-01          |
| Al2    | C6     | 8.0530448966E+01 | 1.1640231015E-02 | 4.3454997748E-02 | 9.6790329730E-02          |
| Al3    | C6     | 8.0530464581E+01 | 1.1640249823E-02 | 4.3455059528E-02 | 9.6790486114E-02          |
| Al4    | C6     | 8.0497768549E+01 | 1.2731307954E-02 | 4.7547148715E-02 | 1.0586280402E-01          |
| H5     | C6     | 5.3402984532E+00 | 9.1625933458E-01 | 4.7509206091E+01 | 7.6188387494E+00 (Bonded) |
| Al1    | C7     | 8.0367608824E+01 | 3.6654569790E-03 | 1.3689247080E-02 | 3.0529925815E-02          |

|     |     |                  |                  |                  |                  |          |
|-----|-----|------------------|------------------|------------------|------------------|----------|
| A12 | C7  | 8.0399376185E+01 | 4.2857189762E-03 | 1.5999330959E-02 | 3.5696144617E-02 |          |
| A13 | C7  | 8.0400501491E+01 | 2.0663027680E-03 | 7.7138644923E-03 | 1.7210424398E-02 |          |
| A14 | C7  | 8.0368284173E+01 | 2.3075177557E-03 | 8.6178019013E-03 | 1.9219526052E-02 |          |
| H5  | C7  | 5.7669393080E+00 | 4.3574232658E-02 | 2.2593791097E+00 | 3.6293376191E-01 |          |
| C6  | C7  | 3.5403587576E+01 | 1.3869756223E+00 | 1.1532917829E+01 | 1.1552246582E+01 | (Bonded) |
| A11 | C8  | 8.0368288301E+01 | 2.3074988683E-03 | 8.6177309753E-03 | 1.9219368618E-02 |          |
| A12 | C8  | 8.0400486415E+01 | 2.0662540620E-03 | 7.7136841609E-03 | 1.7210018614E-02 |          |
| A13 | C8  | 8.0399392388E+01 | 4.2855053696E-03 | 1.5998530425E-02 | 3.5694365247E-02 |          |
| A14 | C8  | 8.0367605639E+01 | 3.6655821291E-03 | 1.3689715091E-02 | 3.0530968013E-02 |          |
| H5  | C8  | 5.7669393969E+00 | 4.3574126646E-02 | 2.2593736128E+00 | 3.6293287668E-01 |          |
| C6  | C8  | 3.5403587814E+01 | 1.3869755936E+00 | 1.1532917590E+01 | 1.1552246271E+01 | (Bonded) |
| C7  | C8  | 3.5998119305E+01 | 7.7120270403E-02 | 6.4234177288E-01 | 6.4234176890E-01 |          |
| A11 | H9  | 1.3307163975E+01 | 4.7907442849E-03 | 1.7891816107E-02 | 2.4095053011E-01 |          |
| A12 | H9  | 1.3310831108E+01 | 8.0808472609E-03 | 3.0167201927E-02 | 4.0642629108E-01 |          |
| A13 | H9  | 1.3313339485E+01 | 3.0692604904E-03 | 1.1458078594E-02 | 1.5436848602E-01 |          |
| A14 | H9  | 1.3308287969E+01 | 2.5415583021E-03 | 9.4918645432E-03 | 1.2782769937E-01 |          |
| H5  | H9  | 9.5550366017E-01 | 6.2735865329E-03 | 3.2529340142E-01 | 3.1553009530E-01 |          |
| C6  | H9  | 5.9536963220E+00 | 4.8299914306E-02 | 4.0162129303E-01 | 2.4292446568E+00 |          |
| C7  | H9  | 5.4881615074E+00 | 9.5936576090E-01 | 7.9906450078E+00 | 4.8251310216E+01 | (Bonded) |
| C8  | H9  | 5.9628021263E+00 | 1.0084597033E-02 | 8.3995528838E-02 | 5.0720490522E-01 |          |
| A11 | H10 | 1.3308294067E+01 | 2.5415656908E-03 | 9.4918917102E-03 | 1.2782801814E-01 |          |
| A12 | H10 | 1.3313342397E+01 | 3.0692779604E-03 | 1.1458146035E-02 | 1.5436930086E-01 |          |
| A13 | H10 | 1.3310839134E+01 | 8.0809709547E-03 | 3.0167657845E-02 | 4.0643234423E-01 |          |
| A14 | H10 | 1.3307168908E+01 | 4.7906842609E-03 | 1.7891592743E-02 | 2.4094741159E-01 |          |
| H5  | H10 | 9.5550408793E-01 | 6.2735236624E-03 | 3.2529014150E-01 | 3.1552680278E-01 |          |
| C6  | H10 | 5.9536987877E+00 | 4.8299925664E-02 | 4.0162138747E-01 | 2.4292442237E+00 |          |
| C7  | H10 | 5.9628045541E+00 | 1.0084601929E-02 | 8.3995570138E-02 | 5.0720494178E-01 |          |
| C8  | H10 | 5.4881637231E+00 | 9.5936633798E-01 | 7.9906497648E+00 | 4.8251319292E+01 | (Bonded) |
| H9  | H10 | 9.8744946390E-01 | 1.7083587640E-02 | 8.5921920545E-02 | 8.5921885023E-02 |          |
| A11 | C11 | 8.0460218620E+01 | 5.3162520838E-04 | 1.9854410714E-03 | 4.4229445629E-03 |          |
| A12 | C11 | 8.0492288955E+01 | 6.1861335149E-04 | 2.3093907467E-03 | 5.1466569237E-03 |          |
| A13 | C11 | 8.0492344357E+01 | 5.3904326359E-04 | 2.0123414415E-03 | 4.4846603101E-03 |          |
| A14 | C11 | 8.0460205158E+01 | 5.5130126581E-04 | 2.0589246106E-03 | 4.5866428035E-03 |          |
| H5  | C11 | 5.7908378232E+00 | 8.8921951889E-03 | 4.6107157427E-01 | 7.3980100536E-02 |          |
| C6  | C11 | 3.6100445669E+01 | 7.5041309686E-02 | 6.2398015111E-01 | 6.2431868813E-01 |          |
| C7  | C11 | 3.5382425816E+01 | 1.3901518403E+00 | 1.1578701591E+01 | 1.1565600025E+01 | (Bonded) |
| C8  | C11 | 3.6025931014E+01 | 1.0314189138E-01 | 8.5907822432E-01 | 8.5810616296E-01 |          |
| H9  | C11 | 5.9498554857E+00 | 4.9498608377E-02 | 2.4895329867E+00 | 4.1181192566E-01 |          |
| H10 | C11 | 5.9717711074E+00 | 5.6723051445E-03 | 2.8528852412E-01 | 4.7191688435E-02 |          |
| A11 | C12 | 8.0460213299E+01 | 5.5130148114E-04 | 2.0589253221E-03 | 4.5866443374E-03 |          |
| A12 | C12 | 8.0492333260E+01 | 5.3904224499E-04 | 2.0123380293E-03 | 4.4846515839E-03 |          |
| A13 | C12 | 8.0492309090E+01 | 6.1861503991E-04 | 2.3093966018E-03 | 5.1466706819E-03 |          |
| A14 | C12 | 8.0460219514E+01 | 5.3162406617E-04 | 1.9854368951E-03 | 4.4229348118E-03 |          |
| H5  | C12 | 5.7908381479E+00 | 8.8921965477E-03 | 4.6107164472E-01 | 7.3980107687E-02 |          |
| C6  | C12 | 3.6100447691E+01 | 7.5041321999E-02 | 6.2398025349E-01 | 6.2431875552E-01 |          |
| C7  | C12 | 3.6025932810E+01 | 1.0314190234E-01 | 8.5907832092E-01 | 8.5810620596E-01 |          |
| C8  | C12 | 3.5382428068E+01 | 1.3901518340E+00 | 1.1578701467E+01 | 1.1565599324E+01 | (Bonded) |
| H9  | C12 | 5.9717689662E+00 | 5.6723183966E-03 | 2.8528930858E-01 | 4.7191796039E-02 |          |
| H10 | C12 | 5.9498582877E+00 | 4.9498615423E-02 | 2.4895323119E+00 | 4.1181196117E-01 |          |
| C11 | C12 | 3.6081167709E+01 | 7.4409635339E-02 | 6.1906336807E-01 | 6.1906333332E-01 |          |
| A11 | H13 | 1.3651744203E+01 | 1.8355180612E-04 | 6.8550416509E-04 | 9.0002831689E-03 |          |
| A12 | H13 | 1.3657183951E+01 | 2.0164786767E-04 | 7.5278640296E-04 | 9.8876058362E-03 |          |
| A13 | H13 | 1.3657184509E+01 | 2.0582983300E-04 | 7.6839825451E-04 | 1.0092664413E-02 |          |
| A14 | H13 | 1.3651741385E+01 | 1.8795728832E-04 | 7.0195718871E-04 | 9.2163016769E-03 |          |
| H5  | H13 | 9.8247472960E-01 | 1.6373963617E-03 | 8.4901073601E-02 | 8.0288128058E-02 |          |
| C6  | H13 | 6.1263184852E+00 | 1.0515366840E-02 | 8.7436909314E-02 | 5.1561072149E-01 |          |
| C7  | H13 | 6.0957034343E+00 | 5.1227256731E-02 | 4.2667649811E-01 | 2.5118783971E+00 |          |
| C8  | H13 | 6.1181135701E+00 | 6.4070609566E-03 | 5.3364995309E-02 | 3.1416396334E-01 |          |
| H9  | H13 | 1.0104326331E+00 | 6.5728036399E-03 | 3.3057922259E-01 | 3.2229099360E-01 |          |
| H10 | H13 | 1.0134921376E+00 | 4.5463290868E-04 | 2.2865757082E-02 | 2.2292479722E-02 |          |
| C11 | H13 | 5.6433087428E+00 | 9.6988515307E-01 | 8.0691212471E+00 | 4.7557369243E+01 | (Bonded) |
| C12 | H13 | 6.1229793831E+00 | 1.0544560660E-02 | 8.7727225656E-02 | 5.1704221186E-01 |          |
| A11 | H14 | 1.3651741321E+01 | 1.8795633942E-04 | 7.0195361326E-04 | 9.2162556075E-03 |          |
| A12 | H14 | 1.3657181180E+01 | 2.0582906295E-04 | 7.6839552886E-04 | 1.0092627157E-02 |          |
| A13 | H14 | 1.3657185920E+01 | 2.0164732211E-04 | 7.5278422022E-04 | 9.8875795774E-03 |          |
| A14 | H14 | 1.3651742909E+01 | 1.8355054297E-04 | 6.8549947850E-04 | 9.0002216796E-03 |          |



|     |      |                  |                  |                  |                  |          |
|-----|------|------------------|------------------|------------------|------------------|----------|
| H5  | H14  | 9.8247468008E-01 | 1.6373974188E-03 | 8.4901128410E-02 | 8.0288183890E-02 |          |
| C6  | H14  | 6.1263181775E+00 | 1.0515371222E-02 | 8.7436945747E-02 | 5.1561096202E-01 |          |
| C7  | H14  | 6.1181132327E+00 | 6.4070500578E-03 | 5.3364904863E-02 | 3.1416344458E-01 |          |
| C8  | H14  | 6.0957031728E+00 | 5.1227245683E-02 | 4.2667640344E-01 | 2.5118779805E+00 |          |
| H9  | H14  | 1.0134916679E+00 | 4.5463307391E-04 | 2.2865774846E-02 | 2.2292488935E-02 |          |
| H10 | H14  | 1.0104329966E+00 | 6.5728139793E-03 | 3.3057960594E-01 | 3.2229151664E-01 |          |
| C11 | H14  | 6.1229787364E+00 | 1.0544555342E-02 | 8.7727186343E-02 | 5.1704197689E-01 |          |
| C12 | H14  | 5.6433087151E+00 | 9.6988528591E-01 | 8.0691218993E+00 | 4.7557378125E+01 | (Bonded) |
| H13 | H14  | 1.0387974749E+00 | 1.9818330828E-03 | 9.7177245572E-02 | 9.7177250414E-02 |          |
| A11 | C15  | 8.0513805629E+01 | 5.3063548043E-04 | 1.9817447709E-03 | 4.4117721252E-03 |          |
| A12 | C15  | 8.0546007850E+01 | 3.9662938977E-04 | 1.4806861837E-03 | 3.2976281277E-03 |          |
| A13 | C15  | 8.0546023475E+01 | 3.9663073666E-04 | 1.4806909246E-03 | 3.2976393259E-03 |          |
| A14 | C15  | 8.0513802003E+01 | 5.3063463695E-04 | 1.9817417101E-03 | 4.4117651124E-03 |          |
| H5  | C15  | 5.7967256602E+00 | 4.8358152508E-03 | 2.5074314083E-01 | 4.0205594448E-02 |          |
| C6  | C15  | 3.6110217266E+01 | 1.0363373417E-01 | 8.6173060383E-01 | 8.6162429109E-01 |          |
| C7  | C15  | 3.6064406014E+01 | 7.4246524760E-02 | 6.1840608306E-01 | 6.1729522509E-01 |          |
| C8  | C15  | 3.6064406239E+01 | 7.4246521720E-02 | 6.1840605391E-01 | 6.1729519981E-01 |          |
| H9  | C15  | 5.9735860514E+00 | 9.9956255859E-03 | 5.0273008544E-01 | 8.3104926000E-02 |          |
| H10 | C15  | 5.9735885204E+00 | 9.9956310468E-03 | 5.0273015226E-01 | 8.3104971402E-02 |          |
| C11 | C15  | 3.5447628826E+01 | 1.3895928637E+00 | 1.1560949527E+01 | 1.1553255083E+01 | (Bonded) |
| C12 | C15  | 3.5447630819E+01 | 1.3895929370E+00 | 1.1560949487E+01 | 1.1553255692E+01 | (Bonded) |
| H13 | C15  | 6.1062961082E+00 | 5.2073227323E-02 | 2.5533597371E+00 | 4.3294355777E-01 |          |
| H14 | C15  | 6.1062958070E+00 | 5.2073218725E-02 | 2.5533594427E+00 | 4.3294348628E-01 |          |
| A11 | H16  | 1.3709785704E+01 | 8.5622905908E-05 | 3.1977271086E-04 | 4.1806760209E-03 |          |
| A12 | H16  | 1.3715256346E+01 | 8.8223351294E-05 | 3.2935304521E-04 | 4.3076469471E-03 |          |
| A13 | H16  | 1.3715259007E+01 | 8.8223315565E-05 | 3.2935284793E-04 | 4.3076452026E-03 |          |
| A14 | H16  | 1.3709785087E+01 | 8.5622772461E-05 | 3.1977222688E-04 | 4.1806695051E-03 |          |
| H5  | H16  | 9.8727929402E-01 | 3.8226188157E-04 | 1.9820762340E-02 | 1.8664550859E-02 |          |
| C6  | H16  | 6.1543289896E+00 | 6.5878137049E-03 | 5.4778694671E-02 | 3.2166059414E-01 |          |
| C7  | H16  | 6.1420414695E+00 | 1.0557481403E-02 | 8.7934226448E-02 | 5.1548600078E-01 |          |
| C8  | H16  | 6.1420415062E+00 | 1.0557484262E-02 | 8.7934249719E-02 | 5.1548614039E-01 |          |
| H9  | H16  | 1.0170673786E+00 | 1.9158010317E-03 | 9.6355231406E-02 | 9.3542065049E-02 |          |
| H10 | H16  | 1.0170677987E+00 | 1.9158024718E-03 | 9.6355263999E-02 | 9.3542135364E-02 |          |
| C11 | H16  | 6.1282787023E+00 | 5.2010442135E-02 | 4.3270954543E-01 | 2.5394934447E+00 |          |
| C12 | H16  | 6.1282790378E+00 | 5.2010462155E-02 | 4.3270968769E-01 | 2.5394944222E+00 |          |
| H13 | H16  | 1.0407586956E+00 | 6.8934674924E-03 | 3.3801443177E-01 | 3.3658463165E-01 |          |
| H14 | H16  | 1.0407586418E+00 | 6.8934709553E-03 | 3.3801461841E-01 | 3.3658480074E-01 |          |
| C15 | H16  | 5.6727780773E+00 | 9.7120917270E-01 | 8.0747588766E+00 | 4.7420849088E+01 | (Bonded) |
| A11 | Na17 | 1.3868870084E+02 | 1.6452812662E-01 | 6.1445713040E-01 | 7.9365200487E-01 |          |
| A12 | Na17 | 1.3874327811E+02 | 1.6614764075E-01 | 6.2025790942E-01 | 8.0146422924E-01 | (Bonded) |
| A13 | Na17 | 1.3874330497E+02 | 1.6614778639E-01 | 6.2025833279E-01 | 8.0146493180E-01 |          |
| A14 | Na17 | 1.3868869471E+02 | 1.6452788882E-01 | 6.1445626998E-01 | 7.9365085777E-01 |          |
| H5  | Na17 | 9.9909576931E+00 | 8.4475170594E-03 | 4.3801445048E-01 | 4.0749195826E-02 |          |
| C6  | Na17 | 6.2324835057E+01 | 5.3202647500E-03 | 4.4238828140E-02 | 2.5663932801E-02 |          |
| C7  | Na17 | 6.2222899884E+01 | 6.2290853823E-04 | 5.1882620833E-03 | 3.0047908548E-03 |          |
| C8  | Na17 | 6.2222900274E+01 | 6.2290037292E-04 | 5.1881940416E-03 | 3.0047514670E-03 |          |
| H9  | Na17 | 1.0303971056E+01 | 9.7361687951E-04 | 4.8968070364E-02 | 4.6965403684E-03 |          |
| H10 | Na17 | 1.0303975314E+01 | 9.7362202243E-04 | 4.8968308783E-02 | 4.6965651769E-03 |          |
| C11 | Na17 | 6.2293632370E+01 | 1.3142726078E-04 | 1.0934310099E-03 | 6.3397980124E-04 |          |
| C12 | Na17 | 6.2293635868E+01 | 1.3142723442E-04 | 1.0934307292E-03 | 6.3397967409E-04 |          |
| H13 | Na17 | 1.0569396370E+01 | 1.1425934602E-04 | 5.6025952050E-03 | 5.5116508592E-04 |          |
| H14 | Na17 | 1.0569395843E+01 | 1.1425905450E-04 | 5.6025811897E-03 | 5.5116367968E-04 |          |
| C15 | Na17 | 6.2335164658E+01 | 4.1797201564E-05 | 3.4750734840E-04 | 2.0162165279E-04 |          |
| H16 | Na17 | 1.0614341797E+01 | 2.0767110392E-05 | 1.0139875483E-03 | 1.0017654207E-04 |          |

### Benzene- $\text{NaAl}_4^- \pi$ - $\pi$

| Atom A | Atom B | 2*D2(A,B)        | DI(A,B)          | %Deloc(A,B)      | %Deloc(B,A)               |
|--------|--------|------------------|------------------|------------------|---------------------------|
| A11    | A12    | 1.7826573145E+02 | 9.5236931115E-01 | 3.5615904302E+00 | 3.5618892226E+00 (Bonded) |
| A11    | A13    | 1.7826590413E+02 | 9.5207004849E-01 | 3.5604712730E+00 | 3.5607695124E+00 (Bonded) |
| A12    | A13    | 1.7839185238E+02 | 6.7018567223E-01 | 2.5065141171E+00 | 2.5065137940E+00          |
| A11    | A14    | 1.7842148900E+02 | 6.7076743631E-01 | 2.5084794881E+00 | 2.5084800294E+00          |
| A12    | A14    | 1.7826584406E+02 | 9.5206694998E-01 | 3.5607583830E+00 | 3.5604604538E+00 (Bonded) |
| A13    | A14    | 1.7826571645E+02 | 9.5236826017E-01 | 3.5618848328E+00 | 3.5615872685E+00 (Bonded) |

|     |     |                  |                  |                  |                  |          |
|-----|-----|------------------|------------------|------------------|------------------|----------|
| A11 | C5  | 8.0359541505E+01 | 1.8131677457E-02 | 6.7807318189E-02 | 1.5081792709E-01 |          |
| A12 | C5  | 8.0354451923E+01 | 1.4827250486E-02 | 5.5454352727E-02 | 1.2333195249E-01 |          |
| A13 | C5  | 8.0341466717E+01 | 4.0818383135E-02 | 1.5266193327E-01 | 3.3952423576E-01 | (Bonded) |
| A14 | C5  | 8.0362600480E+01 | 1.1979040210E-02 | 4.4798213972E-02 | 9.9640753994E-02 |          |
| A11 | C6  | 8.0352733417E+01 | 4.1746571385E-02 | 1.5612030690E-01 | 3.4722323656E-01 | (Bonded) |
| A12 | C6  | 8.0360826519E+01 | 1.2075937044E-02 | 4.5164359569E-02 | 1.0044048663E-01 |          |
| A13 | C6  | 8.0358519121E+01 | 1.6711456224E-02 | 6.2501329523E-02 | 1.3899598757E-01 |          |
| A14 | C6  | 8.0366154253E+01 | 1.4870209032E-02 | 5.5610365637E-02 | 1.2368158479E-01 |          |
| C5  | C6  | 3.5447583700E+01 | 1.3763301423E+00 | 1.1448210434E+01 | 1.1447498338E+01 | (Bonded) |
| A11 | C7  | 8.0334497770E+01 | 2.9267454684E-02 | 1.0945195871E-01 | 2.4350349170E-01 |          |
| A12 | C7  | 8.0326798502E+01 | 3.1185665149E-02 | 1.1663530449E-01 | 2.5946288930E-01 |          |
| A13 | C7  | 8.0335520761E+01 | 1.3761863780E-02 | 5.1469768490E-02 | 1.1449789259E-01 |          |
| A14 | C7  | 8.0342384155E+01 | 1.3460003055E-02 | 5.0336595118E-02 | 1.1198642921E-01 |          |
| C5  | C7  | 3.6088749347E+01 | 7.1990880207E-02 | 5.9881471796E-01 | 5.9895986482E-01 |          |
| C6  | C7  | 3.5439993337E+01 | 1.3739972072E+00 | 1.1428094367E+01 | 1.1431575487E+01 | (Bonded) |
| A11 | C8  | 8.0362693680E+01 | 1.1979420321E-02 | 4.4799625814E-02 | 9.9643821450E-02 |          |
| A12 | C8  | 8.0341531895E+01 | 4.0819384797E-02 | 1.5266569920E-01 | 3.3953224625E-01 | (Bonded) |
| A13 | C8  | 8.0354538132E+01 | 1.4827632993E-02 | 5.5455776166E-02 | 1.2333501746E-01 |          |
| A14 | C8  | 8.0359600061E+01 | 1.8131969420E-02 | 6.7808424681E-02 | 1.5082021291E-01 |          |
| C5  | C8  | 3.6085711043E+01 | 9.5648442005E-02 | 7.9559653469E-01 | 7.9559578189E-01 |          |
| C6  | C8  | 3.6099714743E+01 | 7.2136442248E-02 | 5.9998816956E-01 | 6.0002492430E-01 |          |
| C7  | C8  | 3.5438122791E+01 | 1.3733123558E+00 | 1.1425877564E+01 | 1.1423097905E+01 | (Bonded) |
| A11 | C9  | 8.0366157149E+01 | 1.4870356820E-02 | 5.5610906321E-02 | 1.2368283612E-01 |          |
| A12 | C9  | 8.0358494236E+01 | 1.6711755551E-02 | 6.2502457075E-02 | 1.3899850206E-01 |          |
| A13 | C9  | 8.0360822318E+01 | 1.2076313841E-02 | 4.5165762978E-02 | 1.0044363857E-01 |          |
| A14 | C9  | 8.0352701378E+01 | 4.1747208442E-02 | 1.5612272301E-01 | 3.4722859732E-01 | (Bonded) |
| C5  | C9  | 3.6099674187E+01 | 7.2136242559E-02 | 6.0002383105E-01 | 5.9998661599E-01 |          |
| C6  | C9  | 3.6090088160E+01 | 9.5803971908E-02 | 7.9684065295E-01 | 7.9684079547E-01 |          |
| C7  | C9  | 3.6090990116E+01 | 7.1990725005E-02 | 5.9895857354E-01 | 5.9877628700E-01 |          |
| C8  | C9  | 3.5447611227E+01 | 1.3763305461E+00 | 1.1448202961E+01 | 1.1447503745E+01 | (Bonded) |
| A11 | C10 | 8.0342406387E+01 | 1.3459756323E-02 | 5.0335661548E-02 | 1.1198436977E-01 |          |
| A12 | C10 | 8.0335515308E+01 | 1.3761587864E-02 | 5.1468743191E-02 | 1.1449559019E-01 |          |
| A13 | C10 | 8.0326813887E+01 | 3.1185148144E-02 | 1.1663335584E-01 | 2.5945857245E-01 |          |
| A14 | C10 | 8.0334485690E+01 | 2.9266468562E-02 | 1.0944829451E-01 | 2.4349527277E-01 |          |
| C5  | C10 | 3.5438091126E+01 | 1.3733116106E+00 | 1.1423102515E+01 | 1.1425870686E+01 | (Bonded) |
| C6  | C10 | 3.6090998723E+01 | 7.1990722294E-02 | 5.9877615736E-01 | 5.9895851545E-01 |          |
| C7  | C10 | 3.6068887982E+01 | 9.4209568317E-02 | 7.8381803558E-01 | 7.8381798907E-01 |          |
| C8  | C10 | 3.6088785614E+01 | 7.1990996672E-02 | 5.9881512010E-01 | 5.9896079826E-01 |          |
| C9  | C10 | 3.5439989088E+01 | 1.3739970696E+00 | 1.1428095267E+01 | 1.1431573665E+01 | (Bonded) |
| A11 | H11 | 1.3479436809E+01 | 3.2865291981E-03 | 1.2290684720E-02 | 1.6297246410E-01 |          |
| A12 | H11 | 1.3477916262E+01 | 4.0658773566E-03 | 1.5206500847E-02 | 2.0161879345E-01 |          |
| A13 | H11 | 1.3473540737E+01 | 1.2820403560E-02 | 4.7948680042E-02 | 6.3573838327E-01 |          |
| A14 | H11 | 1.3480006211E+01 | 2.1419054258E-03 | 8.0101189990E-03 | 1.0621284160E-01 |          |
| C5  | H11 | 5.5798074699E+00 | 9.6249685006E-01 | 8.0059762869E+00 | 4.7728309683E+01 | (Bonded) |
| C6  | H11 | 6.0366689608E+00 | 4.9527928732E-02 | 4.1194395476E-01 | 2.4559917472E+00 |          |
| C7  | H11 | 6.0545079562E+00 | 1.0158307612E-02 | 8.4516518435E-02 | 5.0373032550E-01 |          |
| C8  | H11 | 6.0582661024E+00 | 5.5910550858E-03 | 4.6505930984E-02 | 2.7724933185E-01 |          |
| C9  | H11 | 6.0563680837E+00 | 1.0127514595E-02 | 8.4234678641E-02 | 5.0220336086E-01 |          |
| C10 | H11 | 6.0349522068E+00 | 4.9270525508E-02 | 4.0992783338E-01 | 2.4432276319E+00 |          |
| A11 | H12 | 1.3475526616E+01 | 1.3396453393E-02 | 5.0098926586E-02 | 6.6424714621E-01 |          |
| A12 | H12 | 1.3480045128E+01 | 2.0974903371E-03 | 7.8446755255E-03 | 1.0400155398E-01 |          |
| A13 | H12 | 1.3479628816E+01 | 2.9335913911E-03 | 1.0971716634E-02 | 1.4545862644E-01 |          |
| A14 | H12 | 1.3480145471E+01 | 4.1529241082E-03 | 1.5530758688E-02 | 2.0591778335E-01 |          |
| C5  | H12 | 6.0368326146E+00 | 4.9475930402E-02 | 4.1153706170E-01 | 2.4532049351E+00 |          |
| C6  | H12 | 5.5807639806E+00 | 9.6236732292E-01 | 8.0044009731E+00 | 4.7717834648E+01 | (Bonded) |
| C7  | H12 | 6.0554354013E+00 | 4.9332537772E-02 | 4.1044379607E-01 | 2.4460949827E+00 |          |
| C8  | H12 | 6.0565086260E+00 | 1.0135378754E-02 | 8.4305237136E-02 | 5.0255065397E-01 |          |
| C9  | H12 | 6.0591421525E+00 | 5.6088106205E-03 | 4.6650770604E-02 | 2.7810617774E-01 |          |
| C10 | H12 | 6.0550266319E+00 | 1.0150795714E-02 | 8.4454014872E-02 | 5.0331508549E-01 |          |
| H11 | H12 | 1.0134456904E+00 | 6.6518410907E-03 | 3.2985160577E-01 | 3.2982359823E-01 |          |
| A11 | H13 | 1.3464411689E+01 | 7.1181555296E-03 | 2.6619877729E-02 | 3.5331878903E-01 |          |
| A12 | H13 | 1.3462863040E+01 | 7.9559062664E-03 | 2.9755323334E-02 | 3.9490162247E-01 |          |
| A13 | H13 | 1.3465216570E+01 | 3.2523186044E-03 | 1.2163765628E-02 | 1.6143300973E-01 |          |
| A14 | H13 | 1.3466430955E+01 | 3.0738109870E-03 | 1.1495181575E-02 | 1.5257255494E-01 |          |
| C5  | H13 | 6.0500893545E+00 | 1.0145265391E-02 | 8.4387553203E-02 | 5.0357327363E-01 |          |
| C6  | H13 | 6.0308919037E+00 | 4.9293494326E-02 | 4.0999406833E-01 | 2.4467458810E+00 |          |

|     |      |                  |                  |                  |                  |          |
|-----|------|------------------|------------------|------------------|------------------|----------|
| C7  | H13  | 5.5722457545E+00 | 9.6289775227E-01 | 8.0112523402E+00 | 4.7794666242E+01 | (Bonded) |
| C8  | H13  | 6.0305245559E+00 | 4.9286321683E-02 | 4.0995952275E-01 | 2.4463898577E+00 |          |
| C9  | H13  | 6.0504708899E+00 | 1.0133355722E-02 | 8.4283261678E-02 | 5.0298212192E-01 |          |
| C10 | H13  | 6.0509674876E+00 | 5.4550043847E-03 | 4.5385311105E-02 | 2.7076614656E-01 |          |
| H11 | H13  | 1.0147655091E+00 | 1.8622411283E-03 | 9.2344843798E-02 | 9.2434729417E-02 |          |
| H12 | H13  | 1.0124746808E+00 | 6.6163969165E-03 | 3.2806614118E-01 | 3.2841335604E-01 |          |
| A11 | H14  | 1.3479850053E+01 | 2.1417921540E-03 | 8.0096936659E-03 | 1.0620847831E-01 |          |
| A12 | H14  | 1.3473380207E+01 | 1.2819765534E-02 | 4.7946299991E-02 | 6.3571424854E-01 |          |
| A13 | H14  | 1.3477758982E+01 | 4.0656898384E-03 | 1.5205797564E-02 | 2.0161187453E-01 |          |
| A14 | H14  | 1.3479274853E+01 | 3.2863728255E-03 | 1.2290102584E-02 | 1.6296663348E-01 |          |
| C5  | H14  | 6.0581889141E+00 | 5.5908778366E-03 | 4.6504500643E-02 | 2.7724381487E-01 |          |
| C6  | H14  | 6.0562977125E+00 | 1.0127332616E-02 | 8.4233149978E-02 | 5.0220026460E-01 |          |
| C7  | H14  | 6.0348811878E+00 | 4.9268795264E-02 | 4.0991346218E-01 | 2.4431706706E+00 |          |
| C8  | H14  | 5.5797454685E+00 | 9.6248923906E-01 | 8.0059054038E+00 | 4.7728495633E+01 | (Bonded) |
| C9  | H14  | 6.0365972876E+00 | 4.9526014094E-02 | 4.1192810361E-01 | 2.4559257927E+00 |          |
| C10 | H14  | 6.0544368988E+00 | 1.0158092512E-02 | 8.4514723797E-02 | 5.0372560483E-01 |          |
| H11 | H14  | 1.0164656710E+00 | 4.1521172505E-04 | 2.0589525873E-02 | 2.0589768905E-02 |          |
| H12 | H14  | 1.0158242651E+00 | 1.8706887038E-03 | 9.2755865792E-02 | 9.2764837267E-02 |          |
| H13 | H14  | 1.0123839126E+00 | 6.6014564269E-03 | 3.2767176566E-01 | 3.2735699420E-01 |          |
| A11 | H15  | 1.3480239739E+01 | 4.1530007481E-03 | 1.5531041948E-02 | 2.0592018749E-01 |          |
| A12 | H15  | 1.3479718471E+01 | 2.9335829153E-03 | 1.0971686349E-02 | 1.4545722011E-01 |          |
| A13 | H15  | 1.3480138234E+01 | 2.0975344997E-03 | 7.8448396835E-03 | 1.0400303868E-01 |          |
| A14 | H15  | 1.3475614992E+01 | 1.3396675553E-02 | 5.0099768215E-02 | 6.6425365873E-01 |          |
| C5  | H15  | 6.0565439384E+00 | 1.0135466809E-02 | 8.4306049341E-02 | 5.0255161322E-01 |          |
| C6  | H15  | 6.0591842907E+00 | 5.6088916996E-03 | 4.6651436628E-02 | 2.7810831263E-01 |          |
| C7  | H15  | 6.0550672833E+00 | 1.0150937765E-02 | 8.4455201743E-02 | 5.0331871690E-01 |          |
| C8  | H15  | 6.0368788035E+00 | 4.9477207718E-02 | 4.1154729690E-01 | 2.4532516385E+00 |          |
| C9  | H15  | 5.5808017685E+00 | 9.6237176758E-01 | 8.0044393729E+00 | 4.7717731548E+01 | (Bonded) |
| C10 | H15  | 6.0354764066E+00 | 4.9333410269E-02 | 4.1045103084E-01 | 2.4461216620E+00 |          |
| H11 | H15  | 1.0158431383E+00 | 1.8707307512E-03 | 9.2765827362E-02 | 9.2757321851E-02 |          |
| H12 | H15  | 1.0166564771E+00 | 4.1673619124E-04 | 2.0663366463E-02 | 2.0663226385E-02 |          |
| H13 | H15  | 1.0148590395E+00 | 1.8614516393E-03 | 9.2395542120E-02 | 9.2297231286E-02 |          |
| H14 | H15  | 1.0134406206E+00 | 6.6517631558E-03 | 3.2985163455E-01 | 3.2981749806E-01 |          |
| A11 | H16  | 1.3466344863E+01 | 3.0738199958E-03 | 1.1495212785E-02 | 1.5257401028E-01 |          |
| A12 | H16  | 1.3465125883E+01 | 3.2522480306E-03 | 1.2163503248E-02 | 1.6143057340E-01 |          |
| A13 | H16  | 1.3462775870E+01 | 7.9557475908E-03 | 2.9754726047E-02 | 3.9489635580E-01 |          |
| A14 | H16  | 1.3464319769E+01 | 7.1181950684E-03 | 2.6620031337E-02 | 3.5332308627E-01 |          |
| C5  | H16  | 6.0304792771E+00 | 4.9285397891E-02 | 4.0995222663E-01 | 2.4463601691E+00 |          |
| C6  | H16  | 6.0504319900E+00 | 1.0133294335E-02 | 8.4282736024E-02 | 5.0298239850E-01 |          |
| C7  | H16  | 6.0509271632E+00 | 5.4549317963E-03 | 4.5384709867E-02 | 2.7076433269E-01 |          |
| C8  | H16  | 6.0500551394E+00 | 1.0145132208E-02 | 8.4386365554E-02 | 5.0356999043E-01 |          |
| C9  | H16  | 6.0308513823E+00 | 4.9292343611E-02 | 4.0998457070E-01 | 2.4467049311E+00 |          |
| C10 | H16  | 5.5722085090E+00 | 9.6289295864E-01 | 8.0112119821E+00 | 4.7794744121E+01 | (Bonded) |
| H11 | H16  | 1.0123891003E+00 | 6.6016357140E-03 | 3.2736202072E-01 | 3.2768283005E-01 |          |
| H12 | H16  | 1.0148454545E+00 | 1.8614252636E-03 | 9.2296549167E-02 | 9.2394843450E-02 |          |
| H13 | H16  | 1.0144984447E+00 | 4.0758723146E-04 | 2.0231115553E-02 | 2.0231249237E-02 |          |
| H14 | H16  | 1.0147468269E+00 | 1.8622049709E-03 | 9.2344140811E-02 | 9.2433545478E-02 |          |
| H15 | H16  | 1.0124750067E+00 | 6.6160930622E-03 | 3.2804885105E-01 | 3.2840044384E-01 |          |
| A11 | Na17 | 1.3905156336E+02 | 1.7666424396E-01 | 6.6067404032E-01 | 8.4878639887E-01 |          |
| A12 | Na17 | 1.3903991811E+02 | 1.7661098180E-01 | 6.6053026416E-01 | 8.4853049987E-01 |          |
| A13 | Na17 | 1.3903993580E+02 | 1.7661148043E-01 | 6.6053204389E-01 | 8.4853289555E-01 | (Bonded) |
| A14 | Na17 | 1.3905153324E+02 | 1.7666441756E-01 | 6.6067483211E-01 | 8.4878723292E-01 |          |
| C5  | Na17 | 6.2555015420E+01 | 3.7848369198E-03 | 3.1481988359E-02 | 1.8184314083E-02 |          |
| C6  | Na17 | 6.2558904374E+01 | 3.7896794443E-03 | 3.1520307381E-02 | 1.8207580075E-02 |          |
| C7  | Na17 | 6.2539860899E+01 | 3.7748585371E-03 | 3.1406599733E-02 | 1.8136372772E-02 |          |
| C8  | Na17 | 6.2555074551E+01 | 3.7849600175E-03 | 3.1482982487E-02 | 1.8184905508E-02 |          |
| C9  | Na17 | 6.2558893147E+01 | 3.7897555319E-03 | 3.1520945870E-02 | 1.8207945639E-02 |          |
| C10 | Na17 | 6.2539864649E+01 | 3.7747806022E-03 | 3.1405949455E-02 | 1.8135998332E-02 |          |
| H11 | Na17 | 1.0493115913E+01 | 4.3726347740E-04 | 2.1683028533E-02 | 2.1008398984E-03 |          |
| H12 | Na17 | 1.0494004566E+01 | 4.4207582497E-04 | 2.1919801946E-02 | 2.1239609051E-03 |          |
| H13 | Na17 | 1.0482918370E+01 | 4.2443667207E-04 | 2.1067459171E-02 | 2.0392132915E-03 |          |
| H14 | Na17 | 1.0492992063E+01 | 4.3724485371E-04 | 2.1682360949E-02 | 2.1007504206E-03 |          |
| H15 | Na17 | 1.0494075706E+01 | 4.4207864320E-04 | 2.1919793088E-02 | 2.1239744453E-03 |          |
| H16 | Na17 | 1.0482849102E+01 | 4.2443231827E-04 | 2.1067382274E-02 | 2.0391923736E-03 |          |

### Benzene-KAl<sub>4</sub><sup>-</sup> CH-π

| Atom A | Atom B | 2*D2(A,B)        | DI(A,B)          | %Deloc(A,B)      | %Deloc(B,A)               |
|--------|--------|------------------|------------------|------------------|---------------------------|
| A11    | A12    | 1.7902362937E+02 | 9.8609866018E-01 | 3.6806646152E+00 | 3.6791686456E+00 (Bonded) |
| A11    | A13    | 1.7902268921E+02 | 9.8795628154E-01 | 3.6875982837E+00 | 3.6860997290E+00 (Bonded) |
| A12    | A13    | 1.7923491370E+02 | 7.0949217545E-01 | 2.6471401612E+00 | 2.6471403285E+00          |
| A11    | A14    | 1.7909114212E+02 | 7.0517641742E-01 | 2.6321077108E+00 | 2.6321074997E+00          |
| A12    | A14    | 1.7902271404E+02 | 9.8795813955E-01 | 3.6861064283E+00 | 3.6876049230E+00 (Bonded) |
| A13    | A14    | 1.7902363303E+02 | 9.8609745923E-01 | 3.6791643974E+00 | 3.6806598373E+00 (Bonded) |
| A11    | H5     | 1.2842369632E+01 | 2.8446262365E-02 | 1.0617715605E-01 | 1.4819496720E+00          |
| A12    | H5     | 1.2847686324E+01 | 2.8267996503E-02 | 1.0546888522E-01 | 1.4726626510E+00 (Bonded) |
| A13    | H5     | 1.2847685613E+01 | 2.8267791567E-02 | 1.0546812727E-01 | 1.4726519746E+00          |
| A14    | H5     | 1.2842370660E+01 | 2.8446269248E-02 | 1.0617717322E-01 | 1.4819500306E+00          |
| A11    | C6     | 8.0538093663E+01 | 1.2535985970E-02 | 4.6791220635E-02 | 1.0424554036E-01          |
| A12    | C6     | 8.0571326412E+01 | 1.1570019770E-02 | 4.3168149078E-02 | 9.6212852011E-02          |
| A13    | C6     | 8.0571321356E+01 | 1.1569943840E-02 | 4.3167868509E-02 | 9.6212220579E-02          |
| A14    | C6     | 8.0538100169E+01 | 1.2535895465E-02 | 4.6790879067E-02 | 1.0424478775E-01          |
| H5     | C6     | 5.3130528258E+00 | 9.1540809560E-01 | 4.7689524537E+01 | 7.6122621551E+00 (Bonded) |
| A11    | C7     | 8.0419432501E+01 | 3.5489699470E-03 | 1.3246715194E-02 | 2.9557375316E-02          |
| A12    | C7     | 8.0451840789E+01 | 4.1317744433E-03 | 1.5415795190E-02 | 3.4411226290E-02          |
| A13    | C7     | 8.0452821917E+01 | 2.1593467450E-03 | 8.0565988602E-03 | 1.7983984969E-02          |
| A14    | C7     | 8.0420022638E+01 | 2.3815987703E-03 | 8.8894407551E-03 | 1.9834997128E-02          |
| H5     | C7     | 5.7402806077E+00 | 4.3305221920E-02 | 2.2560489177E+00 | 3.6066484545E-01          |
| C6     | C7     | 3.5404074837E+01 | 1.3869087762E+00 | 1.1533121938E+01 | 1.1550783421E+01 (Bonded) |
| A11    | C8     | 8.0420051322E+01 | 2.3814783041E-03 | 8.8889918217E-03 | 1.9833985183E-02          |
| A12    | C8     | 8.0452862156E+01 | 2.1592195498E-03 | 8.0561237808E-03 | 1.7982917788E-02          |
| A13    | C8     | 8.0451870994E+01 | 4.1313708451E-03 | 1.5414290326E-02 | 3.4407849941E-02          |
| A14    | C8     | 8.0419474048E+01 | 3.5489279988E-03 | 1.3246557557E-02 | 2.9557013063E-02          |
| H5     | C8     | 5.7402831331E+00 | 4.3305197153E-02 | 2.2560476274E+00 | 3.6066448188E-01          |
| C6     | C8     | 3.5404090475E+01 | 1.3869089884E+00 | 1.1533123703E+01 | 1.1550780151E+01 (Bonded) |
| C7     | C8     | 3.6003569851E+01 | 7.7561845425E-02 | 6.4596900219E-01 | 6.4596872045E-01          |
| A11    | H9     | 1.3318683361E+01 | 4.8590623326E-03 | 1.8136703266E-02 | 2.4431272786E-02          |
| A12    | H9     | 1.3322551757E+01 | 7.9551411631E-03 | 2.9680910360E-02 | 3.9998298129E-01          |
| A13    | H9     | 1.3324837677E+01 | 3.3816167649E-03 | 1.2616931411E-02 | 1.7002704634E-01          |
| A14    | H9     | 1.3319669636E+01 | 2.8886494036E-03 | 1.0782033504E-02 | 1.4524074138E-01          |
| H5     | H9     | 9.5127181902E-01 | 6.2902569302E-03 | 3.2770014124E-01 | 3.1627291941E-01          |
| C6     | H9     | 5.9551314403E+00 | 4.8256021861E-02 | 4.0128276201E-01 | 2.4263035807E+00          |
| C7     | H9     | 5.4904879525E+00 | 9.5925807446E-01 | 7.9891211691E+00 | 4.8231313132E+01 (Bonded) |
| C8     | H9     | 5.9650656066E+00 | 1.0107973996E-02 | 8.4183595587E-02 | 5.0822700573E-01          |
| A11    | H10    | 1.3319629722E+01 | 2.8886127635E-03 | 1.0781897608E-02 | 1.4523932285E-01          |
| A12    | H10    | 1.3324799661E+01 | 3.3815754340E-03 | 1.2616776406E-02 | 1.7002546427E-01          |
| A13    | H10    | 1.3322512075E+01 | 7.9550618321E-03 | 2.9680616250E-02 | 3.9998015945E-01          |
| A14    | H10    | 1.3318645602E+01 | 4.8589900375E-03 | 1.8136431966E-02 | 2.4430980563E-01          |
| H5     | H10    | 9.5126906664E-01 | 6.2901927738E-03 | 3.2769679892E-01 | 3.1627061634E-01          |
| C6     | H10    | 5.9551141893E+00 | 4.8255635573E-02 | 4.0127954976E-01 | 2.4262912368E+00          |
| C7     | H10    | 5.9650455992E+00 | 1.0107946166E-02 | 8.4183400523E-02 | 5.0822708916E-01          |
| C8     | H10    | 5.4904733132E+00 | 9.5925772587E-01 | 7.9891147815E+00 | 4.8231436317E+01 (Bonded) |
| H9     | H10    | 9.8804666745E-01 | 1.7026560354E-03 | 8.5609220904E-02 | 8.5609470664E-02          |
| A11    | C11    | 8.0521695045E+01 | 5.4844164159E-04 | 2.0470869957E-03 | 4.5619462700E-03          |
| A12    | C11    | 8.0554391975E+01 | 6.3590400538E-04 | 2.3725801207E-03 | 5.2894595986E-03          |
| A13    | C11    | 8.0554427986E+01 | 5.5369749006E-04 | 2.0658648629E-03 | 4.6056645008E-03          |
| A14    | C11    | 8.0521693222E+01 | 5.6500745839E-04 | 2.1089196006E-03 | 4.6997409967E-03          |
| H5     | C11    | 5.7647194310E+00 | 8.8661929085E-03 | 4.6189729619E-01 | 7.3749133181E-02          |
| C6     | C11    | 3.6105213574E+01 | 7.5086781115E-02 | 6.2439939627E-01 | 6.2457303577E-01          |
| C7     | C11    | 3.5392314656E+01 | 1.3903579652E+00 | 1.1579509777E+01 | 1.1565019598E+01 (Bonded) |
| C8     | C11    | 3.6035964753E+01 | 1.0308925004E-01 | 8.5857202821E-01 | 8.5749801622E-01          |
| H9     | C11    | 5.9528150357E+00 | 4.9564205794E-02 | 2.4920788195E+00 | 4.1227584960E-01          |
| H10    | C11    | 5.9747466122E+00 | 5.6661743068E-03 | 2.8489499523E-01 | 4.7131327717E-02          |
| A11    | C12    | 8.0521693777E+01 | 5.6501115360E-04 | 2.1089335623E-03 | 4.6997713240E-03          |
| A12    | C12    | 8.0554440097E+01 | 5.5369999647E-04 | 2.0658740837E-03 | 4.6056849478E-03          |
| A13    | C12    | 8.0554393903E+01 | 6.3590332899E-04 | 2.3725777471E-03 | 5.2894535115E-03          |
| A14    | C12    | 8.0521708521E+01 | 5.4844169874E-04 | 2.0470870448E-03 | 4.5619463478E-03          |
| H5     | C12    | 5.7647199337E+00 | 8.8661929932E-03 | 4.6189730060E-01 | 7.3749127459E-02          |
| C6     | C12    | 3.6105216722E+01 | 7.5086784352E-02 | 6.2439942319E-01 | 6.2457300827E-01          |

|     |     |                  |                  |                  |                  |          |
|-----|-----|------------------|------------------|------------------|------------------|----------|
| C7  | C12 | 3.6035952171E+01 | 1.0308922424E-01 | 8.5857218787E-01 | 8.5749772696E-01 |          |
| C8  | C12 | 3.5392333316E+01 | 1.3903584133E+00 | 1.1579508459E+01 | 1.1565022317E+01 | (Bonded) |
| H9  | C12 | 5.9747645271E+00 | 5.6662647081E-03 | 2.8489870943E-01 | 4.7132075570E-02 |          |
| H10 | C12 | 5.9527982484E+00 | 4.9563943657E-02 | 2.4920729098E+00 | 4.1227363322E-01 |          |
| C11 | C12 | 3.6095476472E+01 | 7.4470959748E-02 | 6.1945062387E-01 | 6.1945056989E-01 |          |
| A11 | H13 | 1.3683259747E+01 | 2.7995856983E-04 | 1.0449599450E-03 | 1.3703575082E-02 |          |
| A12 | H13 | 1.3688813218E+01 | 3.0050303199E-04 | 1.1211873394E-03 | 1.4709197378E-02 |          |
| A13 | H13 | 1.3688810544E+01 | 3.0412000208E-04 | 1.1346824533E-03 | 1.4886242936E-02 |          |
| A14 | H13 | 1.3683259096E+01 | 2.8345600693E-04 | 1.0580142263E-03 | 1.3874769669E-02 |          |
| H5  | H13 | 9.7955743772E-01 | 1.6325041092E-03 | 8.5047690911E-02 | 7.9908761662E-02 |          |
| C6  | H13 | 6.1365947226E+00 | 1.0558586926E-02 | 8.7802076530E-02 | 5.1682786058E-01 |          |
| C7  | H13 | 6.1068242344E+00 | 5.1317355722E-02 | 4.2739340315E-01 | 2.5119118074E+00 |          |
| C8  | H13 | 6.1292654323E+00 | 6.4403090830E-03 | 5.3637689961E-02 | 3.1524399887E-01 |          |
| H9  | H13 | 1.0125083286E+00 | 6.5742688117E-03 | 3.3055298268E-01 | 3.2180113767E-01 |          |
| H10 | H13 | 1.0155619245E+00 | 4.6115001760E-04 | 2.3186602627E-02 | 2.2572639566E-02 |          |
| C11 | H13 | 5.6550674070E+00 | 9.7019817502E-01 | 8.0701238017E+00 | 4.7489825170E+01 | (Bonded) |
| C12 | H13 | 6.1348783366E+00 | 1.0577386061E-02 | 8.7982857283E-02 | 5.1774805158E-01 |          |
| A11 | H14 | 1.3683257626E+01 | 2.8345611840E-04 | 1.0580147272E-03 | 1.3874775504E-02 |          |
| A12 | H14 | 1.3688811037E+01 | 3.0411942734E-04 | 1.1346802371E-03 | 1.4886215208E-02 |          |
| A13 | H14 | 1.3688811980E+01 | 3.0050256870E-04 | 1.1211856818E-03 | 1.4709175101E-02 |          |
| A14 | H14 | 1.3683260473E+01 | 2.7995732606E-04 | 1.0449552187E-03 | 1.3703514574E-02 |          |
| H5  | H14 | 9.7955741093E-01 | 1.6325043099E-03 | 8.5047701368E-02 | 7.9908773662E-02 |          |
| C6  | H14 | 6.1365945565E+00 | 1.0558584935E-02 | 8.7802059975E-02 | 5.1682777720E-01 |          |
| C7  | H14 | 6.1292625937E+00 | 6.4403032340E-03 | 5.3637664641E-02 | 3.1524372115E-01 |          |
| C8  | H14 | 6.1068267329E+00 | 5.1317374075E-02 | 4.2739336959E-01 | 2.5119127742E+00 |          |
| H9  | H14 | 1.0155648578E+00 | 4.6115505587E-04 | 2.3186788304E-02 | 2.2572886797E-02 |          |
| H10 | H14 | 1.0125053450E+00 | 6.5742537225E-03 | 3.3055318836E-01 | 3.2180040783E-01 |          |
| C11 | H14 | 6.1348776366E+00 | 1.0577381717E-02 | 8.7982828821E-02 | 5.1774785307E-01 |          |
| C12 | H14 | 5.6550676537E+00 | 9.7019841747E-01 | 8.0701251151E+00 | 4.7489838329E+01 | (Bonded) |
| H13 | H14 | 1.0424282505E+00 | 1.9864067918E-03 | 9.7231796232E-02 | 9.7231798878E-02 |          |
| A11 | C15 | 8.057579695E+01  | 5.1989706620E-04 | 1.9405428811E-03 | 4.3216208117E-03 |          |
| A12 | C15 | 8.0608405245E+01 | 3.9392844013E-04 | 1.4697608100E-03 | 3.2745123138E-03 |          |
| A13 | C15 | 8.0608400149E+01 | 3.9392798736E-04 | 1.4697592136E-03 | 3.2745085501E-03 |          |
| A14 | C15 | 8.0575586159E+01 | 5.1989640096E-04 | 1.9405402424E-03 | 4.3216152818E-03 |          |
| H5  | C15 | 5.7706270685E+00 | 4.7702131268E-03 | 2.4851123455E-01 | 3.9652180527E-02 |          |
| C6  | C15 | 3.6115082910E+01 | 1.0370817779E-01 | 8.6240644006E-01 | 8.6206952990E-01 |          |
| C7  | C15 | 3.6074516000E+01 | 7.4241401845E-02 | 6.1831489449E-01 | 6.1712828972E-01 |          |
| C8  | C15 | 3.6074531740E+01 | 7.4241421417E-02 | 6.1831478783E-01 | 6.1712845242E-01 |          |
| H9  | C15 | 5.9765952938E+00 | 1.0001889837E-02 | 5.0289311448E-01 | 8.3140256191E-02 |          |
| H10 | C15 | 5.9765778647E+00 | 1.0001846155E-02 | 5.0289238530E-01 | 8.3139893084E-02 |          |
| C11 | C15 | 3.5462088583E+01 | 1.3895870646E+00 | 1.1558607235E+01 | 1.1550879527E+01 | (Bonded) |
| C12 | C15 | 3.5462091701E+01 | 1.3895871307E+00 | 1.1558606777E+01 | 1.1550880076E+01 | (Bonded) |
| H13 | C15 | 6.1181605616E+00 | 5.2227588549E-02 | 2.5564664138E+00 | 4.3413946392E-01 |          |
| H14 | C15 | 6.1181603821E+00 | 5.2227613133E-02 | 2.5564676867E+00 | 4.3413966827E-01 |          |
| A11 | H16 | 1.3741011097E+01 | 1.2453672868E-04 | 4.6483982694E-04 | 6.0703107860E-03 |          |
| A12 | H16 | 1.3746597026E+01 | 1.2706430548E-04 | 4.7408137500E-04 | 6.1935128076E-03 |          |
| A13 | H16 | 1.3746596157E+01 | 1.2706431087E-04 | 4.7408142507E-04 | 6.1935130702E-03 |          |
| A14 | H16 | 1.3741012199E+01 | 1.2453648051E-04 | 4.6483886335E-04 | 6.0702986896E-03 |          |
| H5  | H16 | 9.8431356479E-01 | 3.8452915055E-04 | 2.0032608897E-02 | 1.8743156938E-02 |          |
| C6  | H16 | 6.1644405287E+00 | 6.6412749687E-03 | 5.5226872418E-02 | 3.2371657344E-01 |          |
| C7  | H16 | 6.1530373712E+00 | 1.0586217794E-02 | 8.8166656017E-02 | 5.1600546074E-01 |          |
| C8  | H16 | 6.1530400511E+00 | 1.0586229704E-02 | 8.8166716749E-02 | 5.1600604123E-01 |          |
| H9  | H16 | 1.0191178445E+00 | 1.9181118379E-03 | 9.6442297580E-02 | 9.3494787455E-02 |          |
| H10 | H16 | 1.0191148707E+00 | 1.9181075329E-03 | 9.6442362490E-02 | 9.3494577616E-02 |          |
| C11 | H16 | 6.1399783033E+00 | 5.2136288563E-02 | 4.3367047485E-01 | 2.5412862387E+00 |          |
| C12 | H16 | 6.1399788777E+00 | 5.2136214486E-02 | 4.3366982089E-01 | 2.5412826280E+00 |          |
| H13 | H16 | 1.0443663864E+00 | 6.9059465243E-03 | 3.3803629146E-01 | 3.3661749525E-01 |          |
| H14 | H16 | 1.0443663632E+00 | 6.9059358199E-03 | 3.3803577670E-01 | 3.3661697348E-01 |          |
| C15 | H16 | 5.6843616200E+00 | 9.7162000616E-01 | 8.0765472872E+00 | 4.7359806749E+01 | (Bonded) |
| A11 | K17 | 2.4543736689E+02 | 1.7029287705E-01 | 6.3562703419E-01 | 4.6455730441E-01 |          |
| A12 | K17 | 2.4553642440E+02 | 1.7183937025E-01 | 6.4113871021E-01 | 4.6877612275E-01 | (Bonded) |
| A13 | K17 | 2.4553640899E+02 | 1.7183913265E-01 | 6.4113786423E-01 | 4.6877547457E-01 |          |
| A14 | K17 | 2.4543738650E+02 | 1.7029304695E-01 | 6.3562761734E-01 | 4.6455776788E-01 |          |
| H5  | K17 | 1.7587172986E+01 | 7.5265338727E-03 | 3.9210579798E-01 | 2.0532310851E-02 |          |
| C6  | K17 | 1.1020195508E+02 | 4.5226917221E-03 | 3.7609362645E-02 | 1.2337858820E-02 |          |
| C7  | K17 | 1.1003540041E+02 | 6.2115028939E-04 | 5.1732115249E-03 | 1.6944919193E-03 |          |

|     |     |                  |                  |                  |                  |
|-----|-----|------------------|------------------|------------------|------------------|
| C8  | K17 | 1.1003544842E+02 | 6.2110722753E-04 | 5.1728506308E-03 | 1.6943744469E-03 |
| H9  | K17 | 1.8225976603E+01 | 1.0716396062E-03 | 5.3881835124E-02 | 2.9234223730E-03 |
| H10 | K17 | 1.8225923435E+01 | 1.0716258695E-03 | 5.3881301644E-02 | 2.9233848996E-03 |
| C11 | K17 | 1.1017351570E+02 | 1.2503123254E-04 | 1.0400117746E-03 | 3.4108398051E-04 |
| C12 | K17 | 1.1017352530E+02 | 1.2503161791E-04 | 1.0400148894E-03 | 3.4108503178E-04 |
| H13 | K17 | 1.8722139515E+01 | 1.3828244798E-04 | 6.7687297786E-03 | 3.7723316671E-04 |
| H14 | K17 | 1.8722139005E+01 | 1.3828225554E-04 | 6.7687205431E-03 | 3.7723264174E-04 |
| C15 | K17 | 1.1024726132E+02 | 4.9252466382E-05 | 4.0940889568E-04 | 1.3436024697E-04 |
| H16 | K17 | 1.8801102008E+01 | 3.6338074723E-05 | 1.7712317424E-03 | 9.9129912730E-05 |

### Benzene-KAl<sub>4</sub><sup>-</sup> π-π

| Atom A | Atom B | 2*D2(A,B)        | DI(A,B)          | %Deloc(A,B)      | %Deloc(B,A)               |
|--------|--------|------------------|------------------|------------------|---------------------------|
| Al1    | Al2    | 1.7855669667E+02 | 9.6355899873E-01 | 3.6006322106E+00 | 3.6005719753E+00 (Bonded) |
| Al1    | Al3    | 1.7855677786E+02 | 9.6345146034E-01 | 3.6002303606E+00 | 3.6001695807E+00 (Bonded) |
| Al2    | Al3    | 1.7870171706E+02 | 6.7956345928E-01 | 2.5393537398E+00 | 2.5393533509E+00 (Bonded) |
| Al1    | Al4    | 1.7869588691E+02 | 6.7908860373E-01 | 2.5376217789E+00 | 2.5376224849E+00 (Bonded) |
| Al2    | Al4    | 1.7855670186E+02 | 9.6344899875E-01 | 3.6001609337E+00 | 3.6002221636E+00 (Bonded) |
| Al3    | Al4    | 1.7855667514E+02 | 9.6355727948E-01 | 3.6005649995E+00 | 3.6006267877E+00 (Bonded) |
| Al1    | C5     | 8.0401043610E+01 | 1.6071455068E-02 | 6.0055895762E-02 | 1.3371793676E-01          |
| Al2    | C5     | 8.0403512859E+01 | 1.3823345206E-02 | 5.1654283150E-02 | 1.1501318283E-01          |
| Al3    | C5     | 8.0392222869E+01 | 3.6427954845E-02 | 1.3612187050E-01 | 3.0308836018E-01 (Bonded) |
| Al4    | C5     | 8.0403398091E+01 | 1.1317756132E-02 | 4.2292260952E-02 | 9.4166146892E-02          |
| Al1    | C6     | 8.0391407051E+01 | 3.6490697491E-02 | 1.3635862562E-01 | 3.0360822863E-01 (Bonded) |
| Al2    | C6     | 8.0405323827E+01 | 1.1347551560E-02 | 4.2402879521E-02 | 9.4413378346E-02          |
| Al3    | C6     | 8.0403094727E+01 | 1.5830380180E-02 | 5.9154047214E-02 | 1.3171120355E-01          |
| Al4    | C6     | 8.0402714881E+01 | 1.3830300173E-02 | 5.1681151027E-02 | 1.1507022955E-01          |
| C5     | C6     | 3.5425028507E+01 | 1.3777056900E+00 | 1.1462805425E+01 | 1.1462723732E+01 (Bonded) |
| Al1    | C7     | 8.0375879951E+01 | 2.6657123679E-02 | 9.9612476546E-02 | 2.2184778260E-01          |
| Al2    | C7     | 8.0377040870E+01 | 2.7025009143E-02 | 1.0098550341E-01 | 2.2490942479E-01          |
| Al3    | C7     | 8.0384228008E+01 | 1.2675356416E-02 | 4.7364537262E-02 | 1.0548773935E-01          |
| Al4    | C7     | 8.0382876486E+01 | 1.2619327879E-02 | 4.7155982288E-02 | 1.0502145474E-01          |
| C5     | C7     | 3.6068465036E+01 | 7.2468963596E-02 | 6.0295724626E-01 | 6.0310628688E-01          |
| C6     | C7     | 3.5416962883E+01 | 1.3759878951E+00 | 1.1448431413E+01 | 1.1451342879E+01 (Bonded) |
| Al1    | C8     | 8.0403412735E+01 | 1.1317738369E-02 | 4.2292182809E-02 | 9.4166008157E-02          |
| Al2    | C8     | 8.0392202844E+01 | 3.6427907005E-02 | 1.3612171258E-01 | 3.0308799130E-01 (Bonded) |
| Al3    | C8     | 8.0403517491E+01 | 1.3823242400E-02 | 5.1653891081E-02 | 1.1501233852E-01          |
| Al4    | C8     | 8.0401013631E+01 | 1.6071208097E-02 | 6.0054989586E-02 | 1.3371589477E-01          |
| C5     | C8     | 3.6065044273E+01 | 9.7152461148E-02 | 8.0832921480E-01 | 8.0832929255E-01          |
| C6     | C8     | 3.6077556530E+01 | 7.2642696849E-02 | 6.0439843657E-01 | 6.0440280214E-01          |
| C7     | C8     | 3.5416871774E+01 | 1.3756485435E+00 | 1.1448518703E+01 | 1.1445690627E+01 (Bonded) |
| Al1    | C9     | 8.0402743024E+01 | 1.3830306268E-02 | 5.1681159429E-02 | 1.1507027200E-01          |
| Al2    | C9     | 8.0403088199E+01 | 1.5830363298E-02 | 5.9153993191E-02 | 1.3171105363E-01          |
| Al3    | C9     | 8.0405341858E+01 | 1.1347674400E-02 | 4.2403332048E-02 | 9.4414393608E-02          |
| Al4    | C9     | 8.0391390429E+01 | 3.6490759228E-02 | 1.3635889425E-01 | 3.0360872047E-01 (Bonded) |
| C5     | C9     | 3.6077562523E+01 | 7.2642847764E-02 | 6.0440399966E-01 | 6.0439964877E-01          |
| C6     | C9     | 3.6065589188E+01 | 9.7104274122E-02 | 8.0792253054E-01 | 8.0792247248E-01          |
| C7     | C9     | 3.6068726535E+01 | 7.2465779318E-02 | 6.0307978646E-01 | 6.0292641211E-01          |
| C8     | C9     | 3.5425027694E+01 | 1.3777055603E+00 | 1.1462805448E+01 | 1.1462721829E+01 (Bonded) |
| Al1    | C10    | 8.0382943238E+01 | 1.2619518021E-02 | 4.7156679692E-02 | 1.0502297903E-01          |
| Al2    | C10    | 8.0384260017E+01 | 1.2675685662E-02 | 4.7365774822E-02 | 1.0549042105E-01          |
| Al3    | C10    | 8.0377097120E+01 | 2.7026101671E-02 | 1.0098957044E-01 | 2.2491839264E-01          |
| Al4    | C10    | 8.0375901978E+01 | 2.6657312766E-02 | 9.9613210836E-02 | 2.2184923347E-01          |
| C5     | C10    | 3.5416894864E+01 | 1.3756492668E+00 | 1.1445695545E+01 | 1.1448518388E+01 (Bonded) |
| C6     | C10    | 3.6068743894E+01 | 7.2465831761E-02 | 6.0292689177E-01 | 6.0307988919E-01          |
| C7     | C10    | 3.6047879642E+01 | 9.5835195196E-02 | 7.9756637683E-01 | 7.9756593548E-01          |
| C8     | C10    | 3.6068481489E+01 | 7.2469071921E-02 | 6.0295820554E-01 | 6.0310685466E-01          |
| C9     | C10    | 3.5416985102E+01 | 1.3759886040E+00 | 1.1448436489E+01 | 1.1451342442E+01 (Bonded) |
| Al1    | H11    | 1.3512231584E+01 | 3.1477714212E-03 | 1.1762608398E-02 | 1.5583502792E-01          |
| Al2    | H11    | 1.3512046283E+01 | 3.9705277635E-03 | 1.4836840309E-02 | 1.9656678395E-01          |
| Al3    | H11    | 1.3508055577E+01 | 1.1956079178E-02 | 4.4676783763E-02 | 5.9190318583E-01          |
| Al4    | H11    | 1.3512687083E+01 | 2.2292548936E-03 | 8.3302934422E-03 | 1.1036252386E-01          |
| C5     | H11    | 5.5879039613E+00 | 9.6293295707E-01 | 8.0118077494E+00 | 4.7671404358E+01 (Bonded) |
| C6     | H11    | 6.0445481837E+00 | 4.9731022923E-02 | 4.1376977738E-01 | 2.4620070230E+00          |

|     |     |                  |                  |                  |                  |          |
|-----|-----|------------------|------------------|------------------|------------------|----------|
| C7  | H11 | 6.0627769982E+00 | 1.0187137425E-02 | 8.4780108911E-02 | 5.0432913722E-01 |          |
| C8  | H11 | 6.0664940011E+00 | 5.7517098849E-03 | 4.7855458599E-02 | 2.8474680990E-01 |          |
| C9  | H11 | 6.0643284004E+00 | 1.0171461816E-02 | 8.4628124289E-02 | 5.0355309329E-01 |          |
| C10 | H11 | 6.0431146450E+00 | 4.9518559395E-02 | 4.1210659682E-01 | 2.4514887052E+00 |          |
| A11 | H12 | 1.3509132829E+01 | 1.2026394218E-02 | 4.4940291622E-02 | 5.9532517901E-01 |          |
| A12 | H12 | 1.3514260637E+01 | 2.2229796760E-03 | 8.3067028938E-03 | 1.1004094408E-01 |          |
| A13 | H12 | 1.3513832796E+01 | 3.0827997534E-03 | 1.1519627456E-02 | 1.5260337237E-01 |          |
| A14 | H12 | 1.3513154687E+01 | 3.9751597992E-03 | 1.4854401667E-02 | 1.9677657960E-01 |          |
| C5  | H12 | 6.0451214256E+00 | 4.9702180241E-02 | 4.1353274898E-01 | 2.4603350608E+00 |          |
| C6  | H12 | 5.5885610278E+00 | 9.6290949509E-01 | 8.0115554437E+00 | 4.7665514464E+01 | (Bonded) |
| C7  | H12 | 6.0436871038E+00 | 4.9570780528E-02 | 4.1254142323E-01 | 2.4538305711E+00 |          |
| C8  | H12 | 6.0648818926E+00 | 1.0180078463E-02 | 8.4700433988E-02 | 5.0392968364E-01 |          |
| C9  | H12 | 6.0671403703E+00 | 5.7516823460E-03 | 4.7854880374E-02 | 2.8471720287E-01 |          |
| C10 | H12 | 6.0633808702E+00 | 1.0189963741E-02 | 8.4803583348E-02 | 5.0441902022E-01 |          |
| H11 | H12 | 1.0167900679E+00 | 6.6976153206E-03 | 3.3157524191E-01 | 3.3154235322E-01 |          |
| A11 | H13 | 1.3500685145E+01 | 6.9564797648E-03 | 2.5995009280E-02 | 3.4463660263E-01 |          |
| A12 | H13 | 1.3500830404E+01 | 7.1177943304E-03 | 2.6597365419E-02 | 3.5262841828E-01 |          |
| A13 | H13 | 1.3502825780E+01 | 3.1311797556E-03 | 1.1700411045E-02 | 1.5512431426E-01 |          |
| A14 | H13 | 1.3502612136E+01 | 3.0949857683E-03 | 1.1565361917E-02 | 1.5333119860E-01 |          |
| C5  | H13 | 6.0599493778E+00 | 1.0181146778E-02 | 8.4709314448E-02 | 5.0439244489E-01 |          |
| C6  | H13 | 6.0403079842E+00 | 4.9550382844E-02 | 4.1226682407E-01 | 2.4548156797E+00 |          |
| C7  | H13 | 5.5818833702E+00 | 9.6331555650E-01 | 8.0169722258E+00 | 4.7724396804E+01 | (Bonded) |
| C8  | H13 | 6.0402565708E+00 | 4.9565594077E-02 | 4.1239636260E-01 | 2.4555692717E+00 |          |
| C9  | H13 | 6.0599947879E+00 | 1.0177647040E-02 | 8.4679586302E-02 | 5.0421906155E-01 |          |
| C10 | H13 | 6.0607293643E+00 | 5.6302790147E-03 | 4.6856676612E-02 | 2.7893421631E-01 |          |
| H11 | H13 | 1.0183723532E+00 | 1.8750798297E-03 | 9.2828569332E-02 | 9.2894849698E-02 |          |
| H12 | H13 | 1.0160783612E+00 | 6.6652929368E-03 | 3.2994234506E-01 | 3.3021067996E-01 |          |
| A11 | H14 | 1.3512681413E+01 | 2.2292405450E-03 | 8.3302375073E-03 | 1.1036189057E-01 |          |
| A12 | H14 | 1.3508044150E+01 | 1.1955921389E-02 | 4.4676200990E-02 | 5.9189578756E-01 |          |
| A13 | H14 | 1.3512038939E+01 | 3.9704825120E-03 | 1.4836668943E-02 | 1.9656468076E-01 |          |
| A14 | H14 | 1.3512218370E+01 | 3.1478092042E-03 | 1.1762752858E-02 | 1.5583700723E-01 |          |
| C5  | H14 | 6.0664903447E+00 | 5.7517145176E-03 | 4.7855492541E-02 | 2.8474723807E-01 |          |
| C6  | H14 | 6.0643237216E+00 | 1.0171471286E-02 | 8.4628209158E-02 | 5.0355391369E-01 |          |
| C7  | H14 | 6.0431071041E+00 | 4.9518452058E-02 | 4.1210593157E-01 | 2.4514851031E+00 |          |
| C8  | H14 | 5.5878994587E+00 | 9.6293231900E-01 | 8.0118032111E+00 | 4.7671406056E+01 | (Bonded) |
| C9  | H14 | 6.0445443555E+00 | 4.9731075740E-02 | 4.1377018710E-01 | 2.4620113568E+00 |          |
| C10 | H14 | 6.0627761221E+00 | 1.0187131434E-02 | 8.4780012137E-02 | 5.0432919276E-01 |          |
| H11 | H14 | 1.0198216793E+00 | 4.3059459193E-04 | 2.1317215031E-02 | 2.1317229916E-02 |          |
| H12 | H14 | 1.0191957839E+00 | 1.8847587471E-03 | 9.3298483167E-02 | 9.3307803441E-02 |          |
| H13 | H14 | 1.0159814009E+00 | 6.6555609525E-03 | 3.2972853984E-01 | 3.2949350898E-01 |          |
| A11 | H15 | 1.3513175417E+01 | 3.9753008430E-03 | 1.4854924588E-02 | 1.9678331336E-01 |          |
| A12 | H15 | 1.3513847684E+01 | 3.0829684234E-03 | 1.1520259497E-02 | 1.5261152937E-01 |          |
| A13 | H15 | 1.3514279699E+01 | 2.2230777162E-03 | 8.3070679725E-03 | 1.1004565846E-01 |          |
| A14 | H15 | 1.3509145918E+01 | 1.2026780100E-02 | 4.4941746089E-02 | 5.9534353009E-01 |          |
| C5  | H15 | 6.0648901130E+00 | 1.0180112744E-02 | 8.4700711063E-02 | 5.0393074517E-01 |          |
| C6  | H15 | 6.0671475584E+00 | 5.7517413642E-03 | 4.7855374853E-02 | 2.8471976536E-01 |          |
| C7  | H15 | 6.0633851528E+00 | 1.0189985925E-02 | 8.4803814897E-02 | 5.0441948235E-01 |          |
| C8  | H15 | 6.0451284354E+00 | 4.9702300194E-02 | 4.1353378678E-01 | 2.4603378964E+00 |          |
| C9  | H15 | 5.5885687622E+00 | 9.6291020605E-01 | 8.0115607834E+00 | 4.7665489556E+01 | (Bonded) |
| C10 | H15 | 6.0436979565E+00 | 4.9571094663E-02 | 4.1254380926E-01 | 2.4538430272E+00 |          |
| H11 | H15 | 1.0191977822E+00 | 1.8847594548E-03 | 9.3307773328E-02 | 9.3298400562E-02 |          |
| H12 | H15 | 1.0200257610E+00 | 4.3119568320E-04 | 2.1344855544E-02 | 2.1344828630E-02 |          |
| H13 | H15 | 1.0184746059E+00 | 1.8753744642E-03 | 9.2909446422E-02 | 9.2833829546E-02 |          |
| H14 | H15 | 1.0167906447E+00 | 6.6976097384E-03 | 3.3157519708E-01 | 3.3154165885E-01 |          |
| A11 | H16 | 1.3502617502E+01 | 3.0950480045E-03 | 1.1565591264E-02 | 1.5333426326E-01 |          |
| A12 | H16 | 1.3502825346E+01 | 3.1311911718E-03 | 1.1700455496E-02 | 1.5512486100E-01 |          |
| A13 | H16 | 1.3500834113E+01 | 7.1177950442E-03 | 2.6597364013E-02 | 3.5262841080E-01 |          |
| A14 | H16 | 1.3500682956E+01 | 6.9566269017E-03 | 2.5995566333E-02 | 3.4464385019E-01 |          |
| C5  | H16 | 6.0402579364E+00 | 4.9565503002E-02 | 4.1239556517E-01 | 2.4555644614E+00 |          |
| C6  | H16 | 6.0599950857E+00 | 1.0177653334E-02 | 8.4679644752E-02 | 5.0421931210E-01 |          |
| C7  | H16 | 6.0607267487E+00 | 5.6302725826E-03 | 4.6856649012E-02 | 2.7893386377E-01 |          |
| C8  | H16 | 6.0599495364E+00 | 1.0181136330E-02 | 8.4709235663E-02 | 5.0439186599E-01 |          |
| C9  | H16 | 6.0403091118E+00 | 4.9550472791E-02 | 4.1226754282E-01 | 2.4548198376E+00 |          |
| C10 | H16 | 5.5818868801E+00 | 9.6331672041E-01 | 8.0169774759E+00 | 4.7724448669E+01 | (Bonded) |
| H11 | H16 | 1.0159822455E+00 | 6.6555427724E-03 | 3.2949237888E-01 | 3.2972759911E-01 |          |
| H12 | H16 | 1.0184734456E+00 | 1.8753718624E-03 | 9.2833817806E-02 | 9.2909306236E-02 |          |

|     |     |                  |                  |                  |                           |
|-----|-----|------------------|------------------|------------------|---------------------------|
| H13 | H16 | 1.0183707893E+00 | 4.2390234199E-04 | 2.1000889520E-02 | 2.1000886969E-02          |
| H14 | H16 | 1.0183717666E+00 | 1.8750772200E-03 | 9.2828504948E-02 | 9.2894709120E-02          |
| H15 | H16 | 1.0160797423E+00 | 6.6653491594E-03 | 3.2994471213E-01 | 3.3021342521E-01          |
| A11 | K17 | 2.4558763158E+02 | 1.7962944585E-01 | 6.7124023498E-01 | 4.8916097165E-01          |
| A12 | K17 | 2.4559167920E+02 | 1.7975427505E-01 | 6.7169546029E-01 | 4.8950090238E-01          |
| A13 | K17 | 2.4559171696E+02 | 1.7975399343E-01 | 6.7169430509E-01 | 4.8950013549E-01 (Bonded) |
| A14 | K17 | 2.4558756344E+02 | 1.7962905035E-01 | 6.7123894378E-01 | 4.8915989462E-01          |
| C5  | K17 | 1.1033785622E+02 | 3.4195253395E-03 | 2.8451180753E-02 | 9.3119384168E-03          |
| C6  | K17 | 1.1033864146E+02 | 3.4218026022E-03 | 2.8469925164E-02 | 9.3181397834E-03          |
| C7  | K17 | 1.1031058118E+02 | 3.4350253369E-03 | 2.8587208558E-02 | 9.3541474975E-03          |
| C8  | K17 | 1.1033784564E+02 | 3.4194712312E-03 | 2.8450733296E-02 | 9.3117910709E-03          |
| C9  | K17 | 1.1033864938E+02 | 3.4218199394E-03 | 2.8470067367E-02 | 9.3181869954E-03          |
| C10 | K17 | 1.1031064218E+02 | 3.4351066510E-03 | 2.8587869456E-02 | 9.3543689295E-03          |
| H11 | K17 | 1.8543740959E+01 | 5.5447357127E-04 | 2.7450025080E-02 | 1.5099241084E-03          |
| H12 | K17 | 1.8545579870E+01 | 5.5575082846E-04 | 2.7510528546E-02 | 1.5134022930E-03          |
| H13 | K17 | 1.8530516586E+01 | 5.4094917523E-04 | 2.6799601558E-02 | 1.4730949200E-03          |
| H14 | K17 | 1.8543728013E+01 | 5.5446926374E-04 | 2.7449830996E-02 | 1.5099123783E-03          |
| H15 | K17 | 1.8545603243E+01 | 5.5577390322E-04 | 2.7511636093E-02 | 1.5134651294E-03          |
| H16 | K17 | 1.8530518834E+01 | 5.4095530953E-04 | 2.6799902207E-02 | 1.4731116247E-03          |

### Benzene-MgAl<sub>4</sub> π-π

| Atom A | Atom B | 2*D2(A,B)        | DI(A,B)          | %Deloc(A,B)      | %Deloc(B,A)               |
|--------|--------|------------------|------------------|------------------|---------------------------|
| A11    | A12    | 1.7208978533E+02 | 7.7002872327E-01 | 2.9317116752E+00 | 2.9316151242E+00 (Bonded) |
| A11    | A13    | 1.7209051050E+02 | 7.685899585E-01  | 2.9262340432E+00 | 2.9261375742E+00 (Bonded) |
| A12    | A13    | 1.7222164100E+02 | 5.1768968975E-01 | 1.9709224841E+00 | 1.9709224178E+00          |
| A11    | A14    | 1.7221083308E+02 | 5.1664790223E-01 | 1.9670210229E+00 | 1.9670205952E+00          |
| A12    | A14    | 1.7209054211E+02 | 7.6859017223E-01 | 2.9261383441E+00 | 2.9262340783E+00 (Bonded) |
| A13    | A14    | 1.7208982810E+02 | 7.7002980951E-01 | 2.9316191611E+00 | 2.9317151732E+00 (Bonded) |
| A11    | C5     | 7.9348481986E+01 | 4.2557882001E-02 | 1.6202959158E-01 | 3.5208750373E-01          |
| A12    | C5     | 7.9354994497E+01 | 3.4760850633E-02 | 1.3233978470E-01 | 2.8758153723E-01          |
| A13    | C5     | 7.9313922440E+01 | 1.1691030585E-01 | 4.4509509700E-01 | 9.6721584373E-01 (Bonded) |
| A14    | C5     | 7.9356279631E+01 | 2.6997113185E-02 | 1.0278543165E-01 | 2.2335101612E-01          |
| A11    | C6     | 7.9289197055E+01 | 1.1553193531E-01 | 4.3986193420E-01 | 9.5608700844E-01 (Bonded) |
| A12    | C6     | 7.9336025199E+01 | 2.7102134518E-02 | 1.0318190095E-01 | 2.2428429545E-01          |
| A13    | C6     | 7.9327378859E+01 | 4.4400154341E-02 | 1.6903805751E-01 | 3.6743442948E-01          |
| A14    | C6     | 7.9329609680E+01 | 3.4741197054E-02 | 1.3226928787E-01 | 2.8750152131E-01          |
| C5     | C6     | 3.5840850799E+01 | 1.3487574513E+00 | 1.1158465174E+01 | 1.1161671215E+01 (Bonded) |
| A11    | C7     | 7.9211419004E+01 | 8.3817135032E-02 | 3.1911494458E-01 | 6.9445000237E-01          |
| A12    | C7     | 7.9214653521E+01 | 8.2568423104E-02 | 3.1435040102E-01 | 6.8410405102E-01          |
| A13    | C7     | 7.9240101243E+01 | 3.1678311280E-02 | 1.2060408986E-01 | 2.6246427220E-01          |
| A14    | C7     | 7.9237344042E+01 | 3.2001529884E-02 | 1.2183862179E-01 | 2.6514223488E-01          |
| C5     | C7     | 3.6438644206E+01 | 6.6989141464E-02 | 5.5421084147E-01 | 5.5502504865E-01          |
| C6     | C7     | 3.5792338704E+01 | 1.3386478751E+00 | 1.1078009200E+01 | 1.1091097539E+01 (Bonded) |
| A11    | C8     | 7.9354026042E+01 | 2.6993199955E-02 | 1.0277055526E-01 | 2.2332493934E-01          |
| A12    | C8     | 7.9311695664E+01 | 1.1688179927E-01 | 4.4498658315E-01 | 9.6700727502E-01 (Bonded) |
| A13    | C8     | 7.9352762384E+01 | 3.4753699421E-02 | 1.3231255451E-01 | 2.8753048279E-01          |
| A14    | C8     | 7.9346265115E+01 | 4.2549573405E-02 | 1.6199792323E-01 | 3.5202869298E-01          |
| C5     | C8     | 3.6486926301E+01 | 7.5529394091E-02 | 6.2486558479E-01 | 6.2488320695E-01          |
| C6     | C8     | 3.6480694234E+01 | 6.7011067479E-02 | 5.5455152609E-01 | 5.5440787327E-01          |
| C7     | C8     | 3.5801628198E+01 | 1.3389640743E+00 | 1.1093717343E+01 | 1.1077755552E+01 (Bonded) |
| A11    | C9     | 7.9329582125E+01 | 3.4741086258E-02 | 1.3226889480E-01 | 2.8750064192E-01          |
| A12    | C9     | 7.9327365961E+01 | 4.4399902523E-02 | 1.6903710448E-01 | 3.6743239350E-01          |
| A13    | C9     | 7.9336017895E+01 | 2.7101373628E-02 | 1.0317900066E-01 | 2.2427802796E-01          |
| A14    | C9     | 7.9289204532E+01 | 1.1553078406E-01 | 4.3985745543E-01 | 9.5607760602E-01 (Bonded) |
| C5     | C9     | 3.6481716908E+01 | 6.7015703849E-02 | 5.5443059592E-01 | 5.5458996683E-01          |
| C6     | C9     | 3.6467150713E+01 | 7.5171071346E-02 | 6.2207981309E-01 | 6.2207989427E-01          |
| C7     | C9     | 3.6428139515E+01 | 6.7036737587E-02 | 5.5541939674E-01 | 5.5476403200E-01          |
| C8     | C9     | 3.5839831977E+01 | 1.3487260532E+00 | 1.1158520091E+01 | 1.1161412835E+01 (Bonded) |
| A11    | C10    | 7.9237244541E+01 | 3.2000830655E-02 | 1.2183598613E-01 | 2.6513671794E-01          |
| A12    | C10    | 7.9240016222E+01 | 3.1677783695E-02 | 1.2060208532E-01 | 2.6246017459E-01          |
| A13    | C10    | 7.9214574536E+01 | 8.2566487155E-02 | 3.1434301999E-01 | 6.8408872421E-01          |
| A14    | C10    | 7.9211354475E+01 | 8.3815432513E-02 | 3.1910839323E-01 | 6.9443662039E-01          |
| C5     | C10    | 3.5802608068E+01 | 1.3389853788E+00 | 1.1077619407E+01 | 1.1093905422E+01 (Bonded) |



|     |     |                  |                  |                  |                  |          |
|-----|-----|------------------|------------------|------------------|------------------|----------|
| C6  | C10 | 3.6428106368E+01 | 6.7036529628E-02 | 5.5476223865E-01 | 5.5541825272E-01 |          |
| C7  | C10 | 3.6383862632E+01 | 6.9469021547E-02 | 5.7557159594E-01 | 5.7557219593E-01 |          |
| C8  | C10 | 3.6437579017E+01 | 6.6986400311E-02 | 5.5420379247E-01 | 5.5500291592E-01 |          |
| C9  | C10 | 3.5792296746E+01 | 1.3386462584E+00 | 1.1077997267E+01 | 1.1091095705E+01 | (Bonded) |
| Al1 | H11 | 1.2905377060E+01 | 3.9951187136E-03 | 1.5210518546E-02 | 2.0324386784E-01 |          |
| Al2 | H11 | 1.2904692525E+01 | 6.2143806541E-03 | 2.3659081490E-02 | 3.1614448804E-01 |          |
| Al3 | H11 | 1.2896095876E+01 | 2.3408548074E-02 | 8.9119859022E-02 | 1.1908642001E+00 |          |
| Al4 | H11 | 1.2906138531E+01 | 2.4777896791E-03 | 9.4336264759E-03 | 1.2605271437E-01 |          |
| C5  | H11 | 5.4628917671E+00 | 9.5408505352E-01 | 7.8932834306E+00 | 4.8537215144E+01 | (Bonded) |
| C6  | H11 | 5.9150859047E+00 | 4.6284444518E-02 | 3.8302791326E-01 | 2.3546307880E+00 |          |
| C7  | H11 | 5.9262626658E+00 | 9.9158006890E-03 | 8.2155370849E-02 | 5.0444700877E-01 |          |
| C8  | H11 | 5.9378837758E+00 | 3.7660151457E-03 | 3.1157665833E-02 | 1.9158867093E-01 |          |
| C9  | H11 | 5.9333262189E+00 | 9.8022664067E-03 | 8.1118876460E-02 | 4.9867117373E-01 |          |
| C10 | H11 | 5.9082296682E+00 | 4.5969430233E-02 | 3.8087085892E-01 | 2.3386050510E+00 |          |
| Al1 | H12 | 1.2897749829E+01 | 2.2947038167E-02 | 8.7365701657E-02 | 1.1672186030E+00 |          |
| Al2 | H12 | 1.2908392148E+01 | 2.5127134644E-03 | 9.5662779483E-03 | 1.2781108735E-01 |          |
| Al3 | H12 | 1.2907550898E+01 | 4.1960833511E-03 | 1.5975119666E-02 | 2.1343698091E-01 |          |
| Al4 | H12 | 1.2906164930E+01 | 6.1224497803E-03 | 2.3309849433E-02 | 3.1142307898E-01 |          |
| C5  | H12 | 5.9176195905E+00 | 4.6330965227E-02 | 3.8330276614E-01 | 2.3566598929E+00 |          |
| C6  | H12 | 5.4623598219E+00 | 9.5343767989E-01 | 7.8901939680E+00 | 4.8497334980E+01 | (Bonded) |
| C7  | H12 | 5.9090873640E+00 | 4.5965466705E-02 | 3.8083762288E-01 | 2.3380685317E+00 |          |
| C8  | H12 | 5.9357136337E+00 | 9.8078099895E-03 | 8.1143716736E-02 | 4.9888173764E-01 |          |
| C9  | H12 | 5.9372013629E+00 | 3.7530481235E-03 | 3.1058434289E-02 | 1.9090165606E-01 |          |
| C10 | H12 | 5.9270946085E+00 | 9.9386102722E-03 | 8.2344440897E-02 | 5.0553499381E-01 |          |
| H11 | H12 | 9.6307760299E-01 | 6.0652662409E-03 | 3.0855858327E-01 | 3.0851439463E-01 |          |
| Al1 | H13 | 1.2855568655E+01 | 1.2154365819E-02 | 4.6275022085E-02 | 6.2052807361E-01 |          |
| Al2 | H13 | 1.2856213764E+01 | 1.1711328397E-02 | 4.4586788021E-02 | 5.9790927460E-01 |          |
| Al3 | H13 | 1.2859876400E+01 | 4.3869210260E-03 | 1.6701667363E-02 | 2.2396953440E-01 |          |
| Al4 | H13 | 1.2859405988E+01 | 4.4852940264E-03 | 1.7076747408E-02 | 2.2899186213E-01 |          |
| C5  | H13 | 5.9139782650E+00 | 9.8235671975E-03 | 8.1271790081E-02 | 5.0153165702E-01 |          |
| C6  | H13 | 5.8943153918E+00 | 4.5749069160E-02 | 3.7859740300E-01 | 2.3356695182E+00 |          |
| C7  | H13 | 5.4328054034E+00 | 9.5480357780E-01 | 7.9108328699E+00 | 4.8746469676E+01 | (Bonded) |
| C8  | H13 | 5.8958423848E+00 | 4.5761493414E-02 | 3.7860212045E-01 | 2.3363038251E+00 |          |
| C9  | H13 | 5.9122716053E+00 | 9.8350979913E-03 | 8.1390574978E-02 | 5.0212034929E-01 |          |
| C10 | H13 | 5.9085277821E+00 | 3.3464984712E-03 | 2.7726768434E-02 | 1.7085187995E-01 |          |
| H11 | H13 | 9.6165938823E-01 | 1.7804122694E-03 | 9.0574999623E-02 | 9.0897033398E-02 |          |
| H12 | H13 | 9.5970952738E-01 | 5.9558667384E-03 | 3.0294970547E-01 | 3.0407037019E-01 |          |
| Al1 | H14 | 1.2906207631E+01 | 2.4778051313E-03 | 9.4336873585E-03 | 1.2605279815E-01 |          |
| Al2 | H14 | 1.2896167171E+01 | 2.3408923078E-02 | 8.9121289716E-02 | 1.1908766425E+00 |          |
| Al3 | H14 | 1.2904764835E+01 | 6.2144631847E-03 | 2.3659394900E-02 | 3.1614692517E-01 |          |
| Al4 | H14 | 1.2905451776E+01 | 3.9951289302E-03 | 1.5210554136E-02 | 2.0324325519E-01 |          |
| C5  | H14 | 5.9380842364E+00 | 3.7663049936E-03 | 3.1159185118E-02 | 1.9160234885E-01 |          |
| C6  | H14 | 5.9333600508E+00 | 9.8023233996E-03 | 8.1119337521E-02 | 4.9867129473E-01 |          |
| C7  | H14 | 5.9082685608E+00 | 4.5970103767E-02 | 3.8087604232E-01 | 2.3386262858E+00 |          |
| C8  | H14 | 5.4627963592E+00 | 9.5400703640E-01 | 7.8928605681E+00 | 4.8532975768E+01 | (Bonded) |
| C9  | H14 | 5.9151179662E+00 | 4.6284942804E-02 | 3.8303208681E-01 | 2.3546430181E+00 |          |
| C10 | H14 | 5.9262895054E+00 | 9.9158487692E-03 | 8.2155854848E-02 | 5.0444664417E-01 |          |
| H11 | H14 | 9.6583432933E-01 | 2.8586449382E-04 | 1.4542798241E-02 | 1.4542717215E-02 |          |
| H12 | H14 | 9.6520804333E-01 | 1.8151511596E-03 | 9.2329048537E-02 | 9.2341758373E-02 |          |
| H13 | H14 | 9.5958362987E-01 | 5.9426549128E-03 | 3.0339585464E-01 | 3.0231928683E-01 |          |
| Al1 | H15 | 1.2906152608E+01 | 6.1226939182E-03 | 2.3310784002E-02 | 3.1143572384E-01 |          |
| Al2 | H15 | 1.2907540942E+01 | 4.1963405503E-03 | 1.5976099400E-02 | 2.1345021885E-01 |          |
| Al3 | H15 | 1.2908383124E+01 | 2.5128447965E-02 | 9.5667776278E-03 | 1.2781786066E-01 |          |
| Al4 | H15 | 1.2897742847E+01 | 2.2947831188E-02 | 8.7368701907E-02 | 1.1672597899E+00 |          |
| C5  | H15 | 5.9358765850E+00 | 9.8083313634E-03 | 8.1145741825E-02 | 4.9890862072E-01 |          |
| C6  | H15 | 5.9371977988E+00 | 3.7530838594E-03 | 3.1058725969E-02 | 1.9090361269E-01 |          |
| C7  | H15 | 5.9270964708E+00 | 9.9386210972E-03 | 8.2344444747E-02 | 5.0553591225E-01 |          |
| C8  | H15 | 5.9174515661E+00 | 4.6323300413E-02 | 3.8325016197E-01 | 2.3562717307E+00 |          |
| C9  | H15 | 5.4623551223E+00 | 9.5343688687E-01 | 7.8901884349E+00 | 4.8497329928E+01 | (Bonded) |
| C10 | H15 | 5.9090770378E+00 | 4.5965119596E-02 | 3.8083514397E-01 | 2.3380525769E+00 |          |
| H11 | H15 | 9.6520196563E-01 | 1.8151351200E-03 | 9.2341456886E-02 | 9.2328299851E-02 |          |
| H12 | H15 | 9.6610549125E-01 | 2.8483642339E-04 | 1.4488421982E-02 | 1.4488432524E-02 |          |
| H13 | H15 | 9.6179411969E-01 | 1.7852812580E-03 | 9.1145614373E-02 | 9.0809759276E-02 |          |
| H14 | H15 | 9.6308226848E-01 | 6.0652949951E-03 | 3.0855832692E-01 | 3.0851608170E-01 |          |
| Al1 | H16 | 1.2859410354E+01 | 4.4853231495E-03 | 1.7076862001E-02 | 2.2899322117E-01 |          |
| Al2 | H16 | 1.2859883147E+01 | 4.3869186470E-03 | 1.6701658868E-02 | 2.2396928794E-01 |          |

|     |      |                  |                  |                  |                           |
|-----|------|------------------|------------------|------------------|---------------------------|
| A13 | H16  | 1.2856221397E+01 | 1.1711283790E-02 | 4.4586616693E-02 | 5.9790666350E-01          |
| A14 | H16  | 1.2855578559E+01 | 1.2154506998E-02 | 4.6275549530E-02 | 6.2053493503E-01          |
| C5  | H16  | 5.8960094388E+00 | 4.5767826614E-02 | 3.7864383907E-01 | 2.3366258557E+00          |
| C6  | H16  | 5.9122756734E+00 | 9.8351110271E-03 | 8.1390672235E-02 | 5.0212073458E-01          |
| C7  | H16  | 5.9085372365E+00 | 3.3465087499E-03 | 2.7726824693E-02 | 1.7085230936E-01          |
| C8  | H16  | 5.9138146978E+00 | 9.8234743180E-03 | 8.1273313643E-02 | 5.0152663524E-01          |
| C9  | H16  | 5.8943177716E+00 | 4.5749370380E-02 | 3.7859994516E-01 | 2.3356835930E+00          |
| C10 | H16  | 5.4328024501E+00 | 9.5480375970E-01 | 7.9108426234E+00 | 4.8746451756E+01 (Bonded) |
| H11 | H16  | 9.5957883028E-01 | 5.9426026149E-03 | 3.0231831069E-01 | 3.0339301530E-01          |
| H12 | H16  | 9.6179535581E-01 | 1.7852844849E-03 | 9.0809857344E-02 | 9.1145728250E-02          |
| H13 | H16  | 9.5900896471E-01 | 2.6200880215E-04 | 1.3376577576E-02 | 1.3376570111E-02          |
| H14 | H16  | 9.6166528615E-01 | 1.7804167878E-03 | 9.0574724843E-02 | 9.0897213351E-02          |
| H15 | H16  | 9.5970938425E-01 | 5.9558267270E-03 | 3.0294789068E-01 | 3.0406815774E-01          |
| A11 | Mg17 | 1.4873574918E+02 | 3.5314558858E-01 | 1.3445226312E+00 | 1.5572158926E+00          |
| A12 | Mg17 | 1.4874105552E+02 | 3.5234158460E-01 | 1.3414173876E+00 | 1.5536705906E+00 (Bonded) |
| A13 | Mg17 | 1.4874106111E+02 | 3.5234041546E-01 | 1.3414128913E+00 | 1.5536654351E+00          |
| A14 | Mg17 | 1.4873578139E+02 | 3.5314593572E-01 | 1.3445236604E+00 | 1.5572174233E+00          |
| C5  | Mg17 | 6.8521743909E+01 | 1.4501770879E-02 | 1.1997524473E-01 | 6.3946397219E-02          |
| C6  | Mg17 | 6.8502076486E+01 | 1.4468538303E-02 | 1.1973469903E-01 | 6.3799856253E-02          |
| C7  | Mg17 | 6.8421254179E+01 | 1.4420758585E-02 | 1.1948029278E-01 | 6.3589168824E-02          |
| C8  | Mg17 | 6.8519811770E+01 | 1.4500913011E-02 | 1.1997153075E-01 | 6.3942614398E-02          |
| C9  | Mg17 | 6.8502067693E+01 | 1.4468244049E-02 | 1.1973227955E-01 | 6.3798558724E-02          |
| C10 | Mg17 | 6.8421183160E+01 | 1.4420133330E-02 | 1.1947523690E-01 | 6.3586411727E-02          |
| H11 | Mg17 | 1.1143982905E+01 | 8.6050755023E-04 | 4.3776642286E-02 | 3.7944577994E-03          |
| H12 | Mg17 | 1.1145580576E+01 | 8.5760414120E-04 | 4.3622688921E-02 | 3.7816550494E-03          |
| H13 | Mg17 | 1.1104530091E+01 | 8.0035753475E-04 | 4.0861393071E-02 | 3.5292228281E-03          |
| H14 | Mg17 | 1.1144044992E+01 | 8.6051839527E-04 | 4.3776950097E-02 | 3.7945056212E-03          |
| H15 | Mg17 | 1.1145572451E+01 | 8.5763469710E-04 | 4.3624274911E-02 | 3.7817897874E-03          |
| H16 | Mg17 | 1.1104536288E+01 | 8.0036053820E-04 | 4.0861523603E-02 | 3.5292360720E-03          |

### Benzene-CaAl<sub>4</sub> π-π

| Atom A | Atom B | 2*D2(A,B)        | DI(A,B)          | %Deloc(A,B)      | %Deloc(B,A)               |
|--------|--------|------------------|------------------|------------------|---------------------------|
| A11    | A12    | 1.7384783809E+02 | 8.2119772887E-01 | 3.1105190497E+00 | 3.1103467511E+00 (Bonded) |
| A11    | A13    | 1.7384799845E+02 | 8.2093690558E-01 | 3.1095311076E+00 | 3.1093583294E+00 (Bonded) |
| A12    | A13    | 1.7399859770E+02 | 5.3904460949E-01 | 2.0416710749E+00 | 2.0416707241E+00          |
| A11    | A14    | 1.7397918476E+02 | 5.3918892974E-01 | 2.0423308277E+00 | 2.0423308883E+00          |
| A12    | A14    | 1.7384796480E+02 | 8.2093398821E-01 | 3.1093478139E+00 | 3.1095201494E+00 (Bonded) |
| A13    | A14    | 1.7384786276E+02 | 8.2119794433E-01 | 3.1103470327E+00 | 3.1105199580E+00 (Bonded) |
| A11    | C5     | 7.9472010362E+01 | 2.9661476873E-02 | 1.1235124698E-01 | 2.4629319696E-01          |
| A12    | C5     | 7.9479970010E+01 | 2.2548577229E-02 | 8.5404393435E-02 | 1.8723144489E-01          |
| A13    | C5     | 7.9456484298E+01 | 6.9547320149E-02 | 2.6341554110E-01 | 5.7748411830E-01 (Bonded) |
| A14    | C5     | 7.9478540274E+01 | 1.6596941269E-02 | 6.2865618961E-02 | 1.3781221152E-01          |
| A11    | C6     | 7.9466588979E+01 | 7.4235100237E-02 | 2.8118647352E-01 | 6.1627820056E-01 (Bonded) |
| A12    | C6     | 7.9499572658E+01 | 1.7076008997E-02 | 6.4676639057E-02 | 1.4176005776E-01          |
| A13    | C6     | 7.9496183415E+01 | 2.3881818633E-02 | 9.0454127697E-02 | 1.9825990894E-01          |
| A14    | C6     | 7.9492135296E+01 | 2.3137754489E-02 | 8.7640802827E-02 | 1.9208290493E-01          |
| C5     | C6     | 3.5585799970E+01 | 1.3626046459E+00 | 1.1314347423E+01 | 1.1311947267E+01 (Bonded) |
| A11    | C7     | 7.9417728850E+01 | 4.6241773032E-02 | 1.7515381601E-01 | 3.8418948969E-01          |
| A12    | C7     | 7.9418348112E+01 | 5.3804550893E-02 | 2.0378869081E-01 | 4.4702314800E-01          |
| A13    | C7     | 7.9435228521E+01 | 2.0071036001E-02 | 7.6020510890E-02 | 1.6675573996E-01          |
| A14    | C7     | 7.9431534640E+01 | 1.8625485271E-02 | 7.0549304296E-02 | 1.5474570312E-01          |
| C5     | C7     | 3.6203223486E+01 | 7.0411011142E-02 | 5.8465575095E-01 | 5.8499423065E-01          |
| C6     | C7     | 3.5565452100E+01 | 1.3613318403E+00 | 1.1301380805E+01 | 1.1310322912E+01 (Bonded) |
| A11    | C8     | 7.9478554289E+01 | 1.6596384904E-02 | 6.2863509708E-02 | 1.3780757203E-01          |
| A12    | C8     | 7.9456481870E+01 | 6.9547621837E-02 | 2.6341672903E-01 | 5.7748654067E-01 (Bonded) |
| A13    | C8     | 7.9479995082E+01 | 2.2548516188E-02 | 8.5404147563E-02 | 1.8723091123E-01          |
| A14    | C8     | 7.9472019548E+01 | 2.9661156181E-02 | 1.1235003560E-01 | 2.4629049884E-01          |
| C5     | C8     | 3.6215680800E+01 | 8.7466407223E-02 | 7.2627472846E-01 | 7.2627462446E-01          |
| C6     | C8     | 3.6231833615E+01 | 7.0547741420E-02 | 5.8566682064E-01 | 5.8579100289E-01          |
| C7     | C8     | 3.5558203261E+01 | 1.3604618390E+00 | 1.1303094700E+01 | 1.1296553072E+01 (Bonded) |
| A11    | C9     | 7.9492108322E+01 | 2.3137689824E-02 | 8.7640555295E-02 | 1.9208243905E-01          |
| A12    | C9     | 7.9496140512E+01 | 2.3881571178E-02 | 9.0453205985E-02 | 1.9825792786E-01          |
| A13    | C9     | 7.9499557121E+01 | 1.7075678087E-02 | 6.4675374597E-02 | 1.4175736299E-01          |

|     |     |                  |                  |                  |                           |
|-----|-----|------------------|------------------|------------------|---------------------------|
| A14 | C9  | 7.9466557561E+01 | 7.4234499551E-02 | 2.8118420658E-01 | 6.1627344144E-01 (Bonded) |
| C5  | C9  | 3.6231814906E+01 | 7.0547984080E-02 | 5.8579310169E-01 | 5.8566905144E-01          |
| C6  | C9  | 3.6230633411E+01 | 8.8301194762E-02 | 7.3305082422E-01 | 7.3305109496E-01          |
| C7  | C9  | 3.6210884729E+01 | 7.0439810881E-02 | 5.8523350688E-01 | 5.8477102868E-01          |
| C8  | C9  | 3.5585791700E+01 | 1.3626047831E+00 | 1.1314346942E+01 | 1.1311952584E+01 (Bonded) |
| A11 | C10 | 7.9431558240E+01 | 1.8625546564E-02 | 7.0549534373E-02 | 1.5474617092E-01          |
| A12 | C10 | 7.9435236046E+01 | 2.0071238965E-02 | 7.6021292691E-02 | 1.6675738157E-01          |
| A13 | C10 | 7.9418383395E+01 | 5.3803842598E-02 | 2.0378597307E-01 | 4.4701714357E-01          |
| A14 | C10 | 7.9417747390E+01 | 4.6242536435E-02 | 1.7515671280E-01 | 3.8419572935E-01          |
| C5  | C10 | 3.5558207713E+01 | 1.3604619671E+00 | 1.1296555753E+01 | 1.1303092737E+01 (Bonded) |
| C6  | C10 | 3.6210907788E+01 | 7.0439880052E-02 | 5.8477138695E-01 | 5.8523392483E-01          |
| C7  | C10 | 3.6174839734E+01 | 8.5262552296E-02 | 7.0838495819E-01 | 7.0838476847E-01          |
| C8  | C10 | 3.6203238312E+01 | 7.0411147767E-02 | 5.8465680170E-01 | 5.8499520909E-01          |
| C9  | C10 | 3.5565448439E+01 | 1.3613318050E+00 | 1.1301384686E+01 | 1.1310319589E+01 (Bonded) |
| A11 | H11 | 1.3038483399E+01 | 3.4214601138E-03 | 1.2959749507E-02 | 1.7317384812E-01          |
| A12 | H11 | 1.3039015498E+01 | 3.8019928183E-03 | 1.4400327222E-02 | 1.9243413776E-01          |
| A13 | H11 | 1.3033435274E+01 | 1.4966923371E-02 | 5.6688312503E-02 | 7.5753614787E-01          |
| A14 | H11 | 1.3039265800E+01 | 1.8558846864E-03 | 7.0296892446E-03 | 9.3933783278E-02          |
| C5  | H11 | 5.4701100285E+00 | 9.5683669758E-01 | 7.9450652517E+00 | 4.8429351048E+01 (Bonded) |
| C6  | H11 | 5.9260460469E+00 | 4.7488964950E-02 | 3.9423956824E-01 | 2.4036073870E+00          |
| C7  | H11 | 5.9401151713E+00 | 9.9427333816E-03 | 8.2606989600E-02 | 5.0324169895E-01          |
| C8  | H11 | 5.9461112485E+00 | 4.8359610503E-03 | 4.0155253968E-02 | 2.4476742578E-01          |
| C9  | H11 | 5.9448302384E+00 | 9.9161870432E-03 | 8.2321329733E-02 | 5.0189808207E-01          |
| C10 | H11 | 5.9213901321E+00 | 4.7395996180E-02 | 3.9377899061E-01 | 2.3989018638E+00          |
| A11 | H12 | 1.3047613940E+01 | 1.6702366760E-02 | 6.3264946011E-02 | 8.4435274088E-01          |
| A12 | H12 | 1.3055788325E+01 | 1.8000758838E-03 | 6.8179197046E-03 | 9.0999019971E-02          |
| A13 | H12 | 1.3055401412E+01 | 2.5783885664E-03 | 9.7658345129E-03 | 1.3034496754E-01          |
| A14 | H12 | 1.3053937253E+01 | 4.0549664402E-02 | 1.5359334651E-02 | 2.0499023146E-01          |
| C5  | H12 | 5.9319644272E+00 | 4.7516368239E-02 | 3.9455075996E-01 | 2.4020892570E+00          |
| C6  | H12 | 5.4786795953E+00 | 9.5661338910E-01 | 7.9415259922E+00 | 4.8359561772E+01 (Bonded) |
| C7  | H12 | 5.9285258002E+00 | 4.7501618518E-02 | 3.9465663578E-01 | 2.4013436161E+00          |
| C8  | H12 | 5.9507517127E+00 | 9.9435027374E-03 | 8.2565569408E-02 | 5.0267269969E-01          |
| C9  | H12 | 5.9545296959E+00 | 4.9087876990E-03 | 4.0751342124E-02 | 2.4815335501E-01          |
| C10 | H12 | 5.9473016289E+00 | 9.9531493401E-03 | 8.2693506128E-02 | 5.0316036324E-01          |
| H11 | H12 | 9.7392175426E-01 | 6.2857021374E-03 | 3.1814464909E-01 | 3.1776034525E-01          |
| A11 | H13 | 1.3013898514E+01 | 7.0258137125E-03 | 2.6612259903E-02 | 3.5622703992E-01          |
| A12 | H13 | 1.3013467362E+01 | 9.3303253075E-03 | 3.5339292824E-02 | 4.7307177528E-01          |
| A13 | H13 | 1.3016650126E+01 | 2.9692705946E-03 | 1.1246328667E-02 | 1.5054974668E-01          |
| A14 | H13 | 1.3016130507E+01 | 2.5610570387E-03 | 9.7007293887E-03 | 1.2985225702E-01          |
| C5  | H13 | 5.9331696482E+00 | 9.9319419167E-03 | 8.2469586297E-02 | 5.0357530307E-01          |
| C6  | H13 | 5.9157143559E+00 | 4.7362420475E-02 | 3.9318903283E-01 | 2.4013979789E+00          |
| C7  | H13 | 5.4560312382E+00 | 9.5733710990E-01 | 7.9538225201E+00 | 4.8539482944E+01 (Bonded) |
| C8  | H13 | 5.9144554367E+00 | 4.7362065401E-02 | 3.9326945458E-01 | 2.4013799757E+00          |
| C9  | H13 | 5.9344350949E+00 | 9.9165551410E-03 | 8.2324385575E-02 | 5.0279515351E-01          |
| C10 | H13 | 5.9323711677E+00 | 4.6604298534E-03 | 3.8720134851E-02 | 2.3629592234E-01          |
| H11 | H13 | 9.7328364140E-01 | 1.7914685367E-03 | 9.0673423032E-02 | 9.0832117109E-02          |
| H12 | H13 | 9.7221628790E-01 | 6.2825480610E-03 | 3.1760089756E-01 | 3.1854153699E-01          |
| A11 | H14 | 1.3039277688E+01 | 1.8559130478E-03 | 7.0297964628E-03 | 9.3935135803E-02          |
| A12 | H14 | 1.3033444415E+01 | 1.4967192114E-02 | 5.6689340128E-02 | 7.5754908103E-01          |
| A13 | H14 | 1.3039029214E+01 | 3.8020757260E-03 | 1.4400638767E-02 | 1.9243816411E-01          |
| A14 | H14 | 1.3038494534E+01 | 3.4214482750E-03 | 1.2959705048E-02 | 1.7317309598E-01          |
| C5  | H14 | 5.9461156504E+00 | 4.8359601359E-03 | 4.0155252126E-02 | 2.4476716334E-01          |
| C6  | H14 | 5.9448376941E+00 | 9.9161791552E-03 | 8.2321233846E-02 | 5.0189723959E-01          |
| C7  | H14 | 5.9213936885E+00 | 4.7396199283E-02 | 3.9378078352E-01 | 2.3989100252E+00          |
| C8  | H14 | 5.4701152426E+00 | 9.5683847916E-01 | 7.9450789073E+00 | 4.8429398451E+01 (Bonded) |
| C9  | H14 | 5.9260490769E+00 | 4.7489018782E-02 | 3.9424016075E-01 | 2.4036079890E+00          |
| C10 | H14 | 5.9401219927E+00 | 9.9427754047E-03 | 8.2607316616E-02 | 5.0324338149E-01          |
| H11 | H14 | 9.7571660515E-01 | 3.3722741320E-04 | 1.7068434789E-02 | 1.7068419716E-02          |
| H12 | H14 | 9.7616187434E-01 | 1.8071877074E-03 | 9.1358543134E-02 | 9.1468952666E-02          |
| H13 | H14 | 9.7104959729E-01 | 6.2612773663E-03 | 3.1746305746E-01 | 3.1690813339E-01          |
| A11 | H15 | 1.3054002860E+01 | 4.0549622450E-03 | 1.5359318305E-02 | 2.0498899541E-01          |
| A12 | H15 | 1.3055464351E+01 | 2.5784651504E-03 | 9.7661262584E-03 | 1.3034818796E-01          |
| A13 | H15 | 1.3055855800E+01 | 1.8000558799E-03 | 6.8178427665E-03 | 9.0997554159E-02          |
| A14 | H15 | 1.3047678754E+01 | 1.6702400853E-02 | 6.3265077025E-02 | 8.4435024669E-01          |
| C5  | H15 | 5.9507805854E+00 | 9.9435522468E-03 | 8.2565992330E-02 | 5.0267269157E-01          |
| C6  | H15 | 5.9545616507E+00 | 4.9087914417E-03 | 4.0751358144E-02 | 2.4815230464E-01          |

|     |      |                  |                  |                  |                  |          |
|-----|------|------------------|------------------|------------------|------------------|----------|
| C7  | H15  | 5.9473297666E+00 | 9.9531515706E-03 | 8.2693546807E-02 | 5.0315796260E-01 |          |
| C8  | H15  | 5.9319947002E+00 | 4.7517028269E-02 | 3.9455618400E-01 | 2.4021106243E+00 |          |
| C9  | H15  | 5.4787048772E+00 | 9.5661793817E-01 | 7.9415666903E+00 | 4.8359550173E+01 | (Bonded) |
| C10 | H15  | 5.9285569398E+00 | 4.7501993663E-02 | 3.9465964690E-01 | 2.4013505855E+00 |          |
| H11 | H15  | 9.7616588630E-01 | 1.8071993894E-03 | 9.1469624713E-02 | 9.1358677332E-02 |          |
| H12 | H15  | 9.7808006839E-01 | 3.4219842553E-04 | 1.7299115909E-02 | 1.7299029496E-02 |          |
| H13 | H15  | 9.7446309905E-01 | 1.7986700439E-03 | 9.1197252268E-02 | 9.0927496508E-02 |          |
| H14 | H15  | 9.7392746810E-01 | 6.2857615259E-03 | 3.1814737402E-01 | 3.1776176022E-01 |          |
| A11 | H16  | 1.3016077536E+01 | 2.5610648628E-03 | 9.7007587370E-03 | 1.2985318593E-01 |          |
| A12 | H16  | 1.3016594553E+01 | 2.9692308928E-03 | 1.1246180227E-02 | 1.5054835073E-01 |          |
| A13 | H16  | 1.3013416423E+01 | 9.3299652682E-03 | 3.5337923076E-02 | 4.7305545921E-01 |          |
| A14 | H16  | 1.3013844753E+01 | 7.0258587498E-03 | 2.6612431283E-02 | 3.5623078347E-01 |          |
| C5  | H16  | 5.9144305200E+00 | 4.7361522272E-02 | 3.9326500104E-01 | 2.4013622799E+00 |          |
| C6  | H16  | 5.9344129507E+00 | 9.9165444042E-03 | 8.2324266037E-02 | 5.0279666988E-01 |          |
| C7  | H16  | 5.9323452609E+00 | 4.6604165709E-03 | 3.8720034867E-02 | 2.3629621737E-01 |          |
| C8  | H16  | 5.9331461835E+00 | 9.9318958010E-03 | 8.2469191569E-02 | 5.0357502884E-01 |          |
| C9  | H16  | 5.9156879451E+00 | 4.7362168404E-02 | 3.9318708543E-01 | 2.4013950406E+00 |          |
| C10 | H16  | 5.4560102897E+00 | 9.5733353794E-01 | 7.9537907130E+00 | 4.8539500780E+01 | (Bonded) |
| H11 | H16  | 9.7104477598E-01 | 6.2612138400E-03 | 3.1690519793E-01 | 3.1746113765E-01 |          |
| H12 | H16  | 9.7445423332E-01 | 1.7986620378E-03 | 9.0927545981E-02 | 9.1197220118E-02 |          |
| H13 | H16  | 9.7230915034E-01 | 3.2847392377E-04 | 1.6654482789E-02 | 1.6654551050E-02 |          |
| H14 | H16  | 9.7328051160E-01 | 1.7914632103E-03 | 9.0673073371E-02 | 9.0832219336E-02 |          |
| H15 | H16  | 9.7221714970E-01 | 6.2825735015E-03 | 3.1760059721E-01 | 3.1854413252E-01 |          |
| A11 | Ca17 | 2.5252397119E+02 | 4.2198301858E-01 | 1.5983802339E+00 | 1.1020074539E+00 | (Bonded) |
| A12 | Ca17 | 2.5253756317E+02 | 4.2279971716E-01 | 1.6013850019E+00 | 1.1041402599E+00 |          |
| A13 | Ca17 | 2.5253760641E+02 | 4.2280010969E-01 | 1.6013862135E+00 | 1.1041412850E+00 |          |
| A14 | Ca17 | 2.5252396433E+02 | 4.2198174552E-01 | 1.5983754592E+00 | 1.1020041293E+00 |          |
| C5  | Ca17 | 1.1528395861E+02 | 1.1640512808E-02 | 9.6656654216E-02 | 3.0399166118E-02 |          |
| C6  | Ca17 | 1.1530846702E+02 | 1.1547818603E-02 | 9.5866629748E-02 | 3.0157095465E-02 |          |
| C7  | Ca17 | 1.1521714465E+02 | 1.1854297299E-02 | 9.8488793387E-02 | 3.0957463711E-02 |          |
| C8  | Ca17 | 1.1528397526E+02 | 1.1640238038E-02 | 9.6654358832E-02 | 3.0398448557E-02 |          |
| C9  | Ca17 | 1.1530842453E+02 | 1.1547606009E-02 | 9.5864900265E-02 | 3.0156540278E-02 |          |
| C10 | Ca17 | 1.1521717549E+02 | 1.1854344308E-02 | 9.8489157567E-02 | 3.0957586473E-02 |          |
| H11 | Ca17 | 1.8913235892E+01 | 1.2007398706E-03 | 6.0774270948E-02 | 3.1357287600E-03 |          |
| H12 | Ca17 | 1.8936105174E+01 | 1.2114954996E-03 | 6.1244586494E-02 | 3.1638170546E-03 |          |
| H13 | Ca17 | 1.8880207005E+01 | 1.1692509600E-03 | 5.9284066651E-02 | 3.0534955595E-03 |          |
| H14 | Ca17 | 1.8913252585E+01 | 1.2007601888E-03 | 6.0775245661E-02 | 3.1357818209E-03 |          |
| H15 | Ca17 | 1.8936199763E+01 | 1.2115047292E-03 | 6.1244747146E-02 | 3.1638411576E-03 |          |
| H16 | Ca17 | 1.8880129624E+01 | 1.1692437055E-03 | 5.9283941811E-02 | 3.0534766144E-03 |          |
